# Supplementary material for: Synthesis of tetracyclic dibenzo[b,f][1,4]oxazepine-fused β-lactams via visible-light-induced Staudinger annulation
Source: Royal Society of Chemistry journal article supplement (doi:10.1039/d3ob01078c), 2023-01-01

## Supporting Information

# Synthesis of Tetracyclic Dibenzo[*b,f*][1,4]oxazepine-Fused $\beta$ -lactams *via* Visible-Light-Induced Staudinger annulation

Jiao-Mei Wang,<sup>‡</sup><sup>a</sup> Yu Zhao,<sup>‡</sup><sup>b</sup> Wen-Ping Li,<sup>c</sup> Xiang-Jun Kong,<sup>a</sup> Chang-Sheng Yao<sup>\*,c</sup> and Kai

Zhang<sup>\*,c</sup>

<sup>a</sup> School of Materials and Chemical Engineering, Xuzhou University of Technology, Xuzhou 221018, PR China

<sup>b</sup> College of Chemistry and Chemical Engineering, Yan'an University, Yan'an, Shanxi 716000, P. R. China.

<sup>c</sup> Jiangsu Key Lab of Green Synthetic Chemistry for Functional Materials, School of Chemistry and Materials Science, Jiangsu Normal University, Xuzhou, Jiangsu 221116, P R China. E-mail: [zhangkai@jsnu.edu.cn](mailto:zhangkai@jsnu.edu.cn).

<sup>‡</sup> Jiaomei Wang and Yu Zhao contributed equally to this work.

## Table of Contents

---

|                                                                       |            |
|-----------------------------------------------------------------------|------------|
| <b>1. General Information.....</b>                                    | <b>S2</b>  |
| <b>2. Preparation of the Materials.....</b>                           | <b>S2</b>  |
| <b>3. General Procedures for the Synthesis of Products.....</b>       | <b>S3</b>  |
| <b>4. Characterization Data of the Products.....</b>                  | <b>S4</b>  |
| <b>5. X-Ray Structures of Product 3aa.....</b>                        | <b>S13</b> |
| <b>6. Copies of <sup>1</sup>H and <sup>13</sup>C NMR Spectra.....</b> | <b>S14</b> |

## 1. General Information

Unless otherwise noted, materials were purchased from commercial suppliers and used without further purification. All the solvents were treated according to standard methods. Flash column chromatography was performed using 200-300 mesh silica gel.  $^1\text{H}$  NMR spectra were recorded on 400 MHz spectrophotometers. Chemical shifts ( $\delta$ ) are reported in ppm from the resonance of tetramethyl silane as the internal standard (TMS: 0.00 ppm). Data are reported as follows: chemical shift, multiplicity (s = singlet, d = doublet, t = triplet, dd = doublet of doublets, m = multiplet), coupling constants (Hz) and integration.  $^{13}\text{C}$  NMR spectra were recorded on 100 MHz with complete proton decoupling spectrophotometers ( $\text{CDCl}_3$ : 77.0 ppm). The high resolution mass spectra (HRMS) were measured on a Shimadzu LCMS-IT-TOF mass spectrometer or DIONEX UltiMate 3000 & Bruker Compact TOF mass spectrometer by ESI.

## 2. Preparation of the Substrates

All the solvents were treated according to standard methods and all chemicals were used without purification. The dibenzoxazepine-imines **1**<sup>1</sup> and  $\alpha$ -diazo ketones **2**<sup>2</sup> were known compounds or prepared from conventional methods.

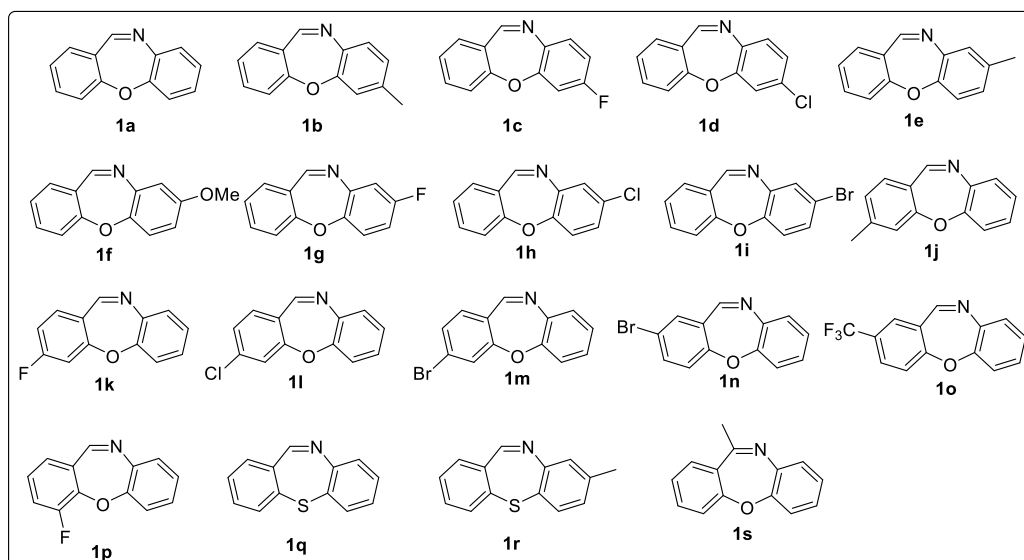

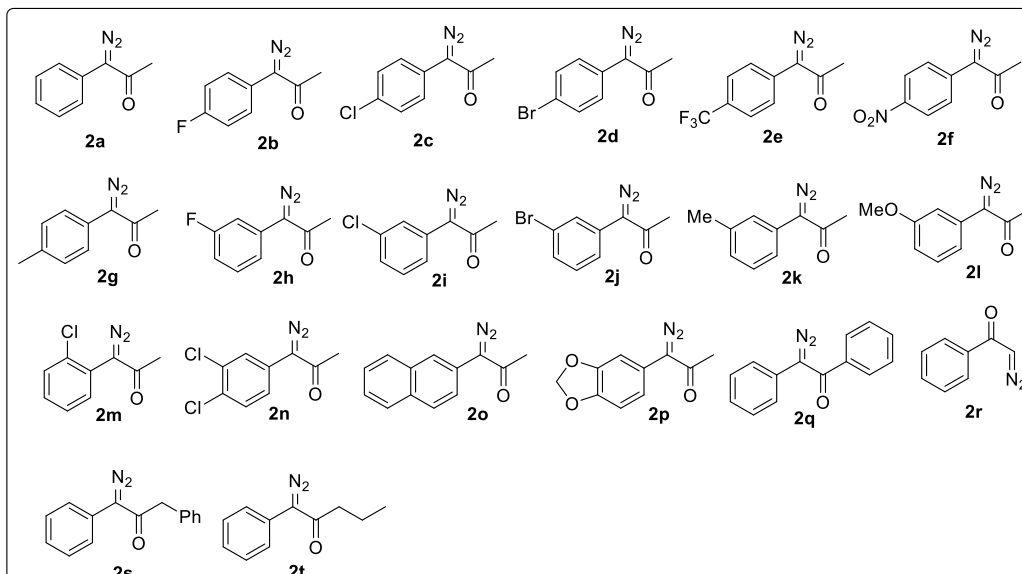

### 3. General Procedures for the Synthesis of Products

#### 3.1 General procedure for the synthesis of products 3.

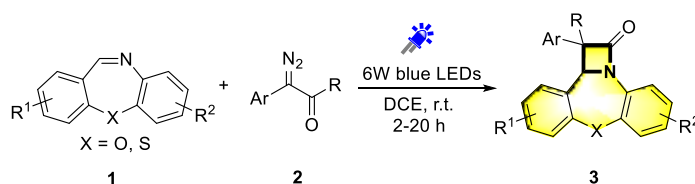

**Procedure:** An oven-dried 10 mL Schlenk tube equipped with a magnetic stir bar was charged with dibenzoxazepine-imines **1** (0.15 mmol, 1.0 equiv.),  $\alpha$ -diazo ketones **2** (0.3 mmol, 2.0 equiv.) and 2 mL of anhydrous DCE under Argon and irradiation of 6W blue LEDs, after 2 h of stirring at room temperature until the reaction was completed, as monitored by TLC analysis. The product was purified by flash column chromatography on silica gel (PE/EA=20/1) to give product **3**. All the products **3** were prepared according to the above procedure.

#### 3.2 General procedure of the sunlight reaction.

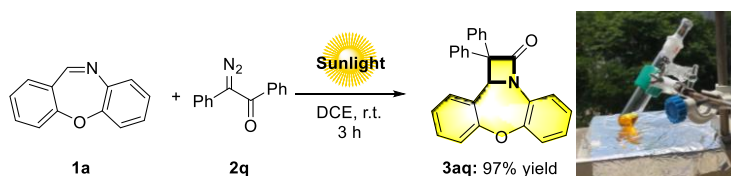

**Procedure:** An oven-dried 10 mL Schlenk tube equipped with a magnetic stir bar was

charged with dibenzoxazepine-imine **1a** (0.15 mmol, 1.0 equiv.),  $\alpha$ -diazo ketone **2q** (0.3 mmol, 1.5 equiv.) and 2 mL of anhydrous DCE under Ar and irradiation of sunlight, after 3 h of stirring at ambient temperature until the reaction was completed, as monitored by TLC analysis. The product **3aq** was purified by flash column chromatography on silica gel (PE/EA=20/1).

### 3.3 General procedure of gram-scale reaction.

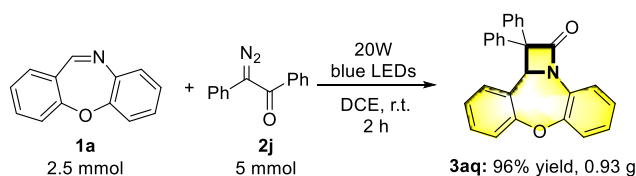

**Procedure:** An oven-dried 100 mL Schlenk bottle equipped with a magnetic stir bar was charged with dibenzoxazepine-imine **1a** (2.5 mmol, 1.0 equiv.),  $\alpha$ -diazo ketone **2q** (5 mmol, 1.5 equiv.) and 33 mL of anhydrous DCE under Argon and irradiation of 20W blue LEDs, after 4 h of stirring at room temperature until the reaction was completed, as monitored by TLC analysis. The product **3aq** was purified by flash column chromatography on silica gel (PE/EA=20/1).

## 4. Characterization Data of Products

### 1-methyl-1-phenyl-1,12b-dihydro-2H-azeto[1,2-d]dibenzo[b,f][1,4]oxazepin-2-one (**3aa**)

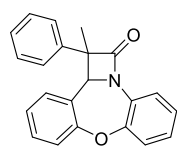

White solid, 41.2 mg, 84% yield, >20:1 d.r.; m.p.: 125-126 °C;  $^1\text{H}$  NMR (400 MHz,  $\text{CDCl}_3$ ):  $\delta$  (ppm) 7.75 (dd,  $J = 7.3, 2.2$  Hz, 1H), 7.60 (d,  $J = 7.3$  Hz, 2H), 7.44 (t,  $J = 7.6$  Hz, 2H), 7.40-7.31 (m, 4H), 7.27 (dd,  $J = 7.1, 5.2$  Hz, 1H), 7.18 (m, 3H), 5.42 (s, 1H), 1.65 (s, 3H);  $^{13}\text{C}$  NMR (100 MHz,  $\text{CDCl}_3$ ):  $\delta$  (ppm) 169.2, 155.76, 150.3, 140.9, 129.6, 129.1, 129.0, 128.0, 127.5, 127.3, 126.6, 126.0, 125.1, 124.6, 124.5, 122.5, 121.5, 65.0, 64.4, 21.6; IR (KBr,  $\tilde{\nu}$ ,  $\text{cm}^{-1}$ ): 1752; HRMS (ESI) for:  $\text{C}_{22}\text{H}_{18}\text{NO}_2$   $[\text{M}+\text{H}]^+$ : calcd 328.1332 found 328.1340.

### 1-(4-fluorophenyl)-1-methyl-1,12b-dihydro-2H-azeto[1,2-d]dibenzo[b,f][1,4]oxazepin-2-one (**3ab**)

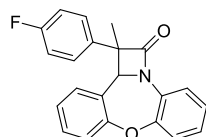

White solid, 45.1 mg, 87% yield, >20:1 d.r.; m.p.: 166-168 °C;  $^1\text{H}$  NMR (400 MHz,  $\text{CDCl}_3$ ):  $\delta$  (ppm) 7.74 (d,  $J = 7.4$  Hz, 1H), 7.60-7.52 (m, 2H), 7.37-7.24 (m, 4H), 7.21-7.10 (m, 5H), 5.37 (s,

1H), 1.62 (s, 3H); <sup>13</sup>C NMR (100 MHz, CDCl<sub>3</sub>): δ (ppm) 169.0, 162.1 (d, *J* = 246.6 Hz), 155.7, 150.3, 136.7 (d, *J* = 3.3 Hz), 129.7, 129.0, 127.8, 127.7, 127.6, 127.4, 126.4, 125.2, 124.6 (d, *J* = 2.7 Hz), 122.5, 121.5, 115.8 (d, *J* = 21.4 Hz), 65.1, 63.8, 21.7; <sup>19</sup>F NMR (400 MHz, CDCl<sub>3</sub>): δ (ppm) -114.60; IR (KBr,  $\tilde{\nu}$ , cm<sup>-1</sup>): 1750; HRMS (ESI) for: C<sub>22</sub>H<sub>17</sub>FNO<sub>2</sub> [M+H]<sup>+</sup>: calcd 346.1238, found 346.1246.

**1-(4-chlorophenyl)-1-methyl-1,12b-dihydro-2H-azeto[1,2-*d*]dibenzo[*b,f*][1,4]oxazepin-2-one (3ac)**

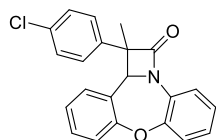

White solid, 45.6 mg, 84% yield, >20:1 d.r.; m.p.: 172-174 °C; <sup>1</sup>H NMR (400 MHz, CDCl<sub>3</sub>): δ (ppm) 7.73 (d, *J* = 7.5 Hz, 1H), 7.53 (d, *J* = 8.1 Hz, 2H), 7.41 (d, *J* = 8.1 Hz, 2H), 7.38-7.28 (m, 4H), 7.23-7.12 (m, 3H), 5.37 (s, 1H), 1.62 (s, 3H); <sup>13</sup>C NMR (100 MHz, CDCl<sub>3</sub>): δ (ppm) 168.8, 155.7, 150.4, 139.4, 133.4, 129.7, 129.1, 129.0, 127.9, 127.4, 126.3, 125.2, 124.6, 122.5, 121.6, 64.9, 63.9, 21.6; IR (KBr,  $\tilde{\nu}$ , cm<sup>-1</sup>): 1748; HRMS (ESI) for: C<sub>22</sub>H<sub>17</sub>ClNO<sub>2</sub> [M+H]<sup>+</sup>: calcd 362.0942, found 362.0949.

**1-(4-bromophenyl)-1-methyl-1,12b-dihydro-2H-azeto[1,2-*d*]dibenzo[*b,f*][1,4]oxazepin-2-one (3ad)**

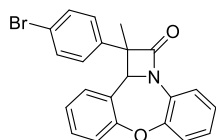

White solid, 53.6 mg, 88% yield, >20:1 d.r.; m.p.: 161-162 °C; <sup>1</sup>H NMR (400 MHz, CDCl<sub>3</sub>): δ (ppm) 7.73 (d, *J* = 5.7 Hz, 1H), 7.59-7.54 (m, 2H), 7.47 (d, *J* = 8.1 Hz, 2H), 7.38-7.24 (m, 4H), 7.23-7.11 (m, 3H), 5.36 (s, 1H), 1.61 (s, 3H); <sup>13</sup>C NMR (100 MHz, CDCl<sub>3</sub>): δ (ppm) 168.7, 155.7, 150.4, 139.9, 132.1, 129.7, 129.0, 127.9, 127.8, 127.4, 126.3, 125.2, 124.6, 122.5, 121.5, 121.5, 64.9, 63.9, 21.5; IR (KBr,  $\tilde{\nu}$ , cm<sup>-1</sup>): 1751; HRMS (ESI) for: C<sub>22</sub>H<sub>17</sub>BrNO<sub>2</sub> [M+H]<sup>+</sup>: calcd 406.0437, found 406.0442.

**1-methyl-1-(4-(trifluoromethyl)phenyl)-1,12b-dihydro-2H-azeto[1,2-*d*]dibenzo[*b,f*][1,4]oxazepin-2-one (3ae)**

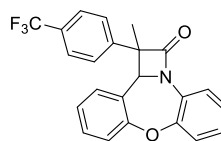

White solid, 55.2 mg, 93% yield, >20:1 d.r.; m.p.: 113-114 °C; <sup>1</sup>H NMR (400 MHz, CDCl<sub>3</sub>): δ (ppm) 7.74-7.69 (m, 5H), 7.41-7.11 (m, 7H), 5.42 (s, 1H), 1.66 (d, *J* = 1.7 Hz, 3H); <sup>13</sup>C NMR (100 MHz, CDCl<sub>3</sub>): δ (ppm) 168.4, 155.8, 150.5, 144.9, 130.0 (q, *J* = 30), 129.9, 128.9, 127.9, 127.6, 126.5, 126.2, 126.0 (q, *J* = 3.3), 125.2, 124.7, 124.6, 124.0 (q, *J* = 270), 122.6, 121.6, 64.7, 64.2, 21.6; <sup>19</sup>F NMR (400 MHz, CDCl<sub>3</sub>): δ (ppm) -62.50; IR (KBr,  $\tilde{\nu}$ , cm<sup>-1</sup>): 1755; HRMS (ESI) for: C<sub>23</sub>H<sub>17</sub>F<sub>3</sub>NO<sub>2</sub> [M+H]<sup>+</sup>: calcd 396.1206, found 396.1203.

**1-methyl-1-(4-nitrophenyl)-1,12b-dihydro-2H-azeto[1,2-*d*]dibenzo[*b,f*][1,4]oxazepin-2-one (3af)**

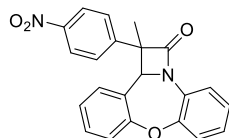

White solid, 45.2 mg, 81% yield, >20:1 d.r.; m.p.: 150-152 °C; <sup>1</sup>H NMR (400 MHz, CDCl<sub>3</sub>): δ (ppm) 8.31 (d, *J* = 7.6 Hz, 2H), 7.79 (d, *J* = 7.6 Hz, 2H), 7.73 (d, *J* = 7.3 Hz, 1H), 7.43-7.14 (m, 7H),

5.44 (s, 1H), 1.68 (s, 3H);  $^{13}\text{C}$  NMR (100 MHz,  $\text{CDCl}_3$ ):  $\delta$  (ppm) 167.9, 155.9, 150.5, 148.1, 147.3, 130.1, 128.8, 127.8, 127.7, 127.1, 125.9, 125.3, 124.8, 124.7, 124.2, 122.7, 121.6, 64.6, 64.2, 21.7; IR (KBr,  $\tilde{\nu}$ ,  $\text{cm}^{-1}$ ): 1757; HRMS (ESI) for:  $\text{C}_{22}\text{H}_{17}\text{N}_2\text{O}_4$   $[\text{M}+\text{H}]^+$ : calcd 373.1183, found 373.1177.

**1-methyl-1-(p-tolyl)-1,12b-dihydro-2H-azeto[1,2-d]dibenzo[b,f][1,4]oxazepin-2-one (3ag)**

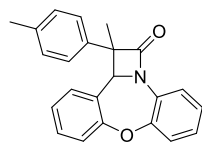

White solid, 43.5 mg, 85% yield, >20:1 d.r.; m.p.: 130-131 °C;  $^1\text{H}$  NMR (400 MHz,  $\text{CDCl}_3$ ):  $\delta$  (ppm) 7.74 (d,  $J = 7.4$  Hz, 1H), 7.48 (d,  $J = 7.7$  Hz, 2H), 7.38-7.09 (m, 9H), 5.38 (s, 1H), 2.38 (s, 3H), 1.62 (s, 3H);  $^{13}\text{C}$  NMR (100 MHz,  $\text{CDCl}_3$ ):  $\delta$  (ppm) 169.3, 155.7, 150.4, 138.0, 137.2, 129.6, 129.5, 129.1, 128.0, 127.2, 126.6, 125.9, 125.1, 124.6, 124.5, 122.4, 121.5, 65.1, 64.2, 21.5, 21.1; IR (KBr,  $\tilde{\nu}$ ,  $\text{cm}^{-1}$ ): 1749; HRMS (ESI) for:  $\text{C}_{23}\text{H}_{19}\text{NNaO}_2$   $[\text{M}+\text{Na}]^+$ : calcd 364.1308, found 364.1306.

**1-(3-fluorophenyl)-1-methyl-1,12b-dihydro-2H-azeto[1,2-d]dibenzo[b,f][1,4]oxazepin-2-one (3ah)**

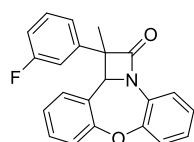

White solid, 50.3 mg, 97% yield, >20:1 d.r.; m.p.: 126-128 °C;  $^1\text{H}$  NMR (400 MHz,  $\text{CDCl}_3$ ):  $\delta$  (ppm) 7.74 (dd,  $J = 7.5, 2.0$  Hz, 1H), 7.45-7.12 (m, 10H), 7.06-7.02 (m, 1H), 5.38 (s, 1H), 1.63 (s, 3H);  $^{13}\text{C}$  NMR (100 MHz,  $\text{CDCl}_3$ ):  $\delta$  (ppm) 168.6, 163.0 (d,  $J = 247.0$  Hz), 155.7, 150.4, 143.3 (d,  $J = 7.2$  Hz), 130.6 (d,  $J = 8.4$  Hz), 129.7, 128.9, 127.9, 127.5, 126.2, 125.2, 124.7, 124.6, 122.5, 121.7 (d,  $J = 2.9$  Hz), 121.5, 114.5 (d,  $J = 21.0$  Hz), 113.3 (d,  $J = 22.2$  Hz), 65.0, 64.1 (d,  $J = 1.8$  Hz), 21.4;  $^{19}\text{F}$  NMR (400 MHz,  $\text{CDCl}_3$ ):  $\delta$  (ppm) -111.63; IR (KBr,  $\tilde{\nu}$ ,  $\text{cm}^{-1}$ ): 1755; HRMS (ESI) for:  $\text{C}_{22}\text{H}_{16}\text{FNNaO}_2$   $[\text{M}+\text{Na}]^+$ : calcd 368.1057, found 368.1058.

**1-(3-chlorophenyl)-1-methyl-1,12b-dihydro-2H-azeto[1,2-d]dibenzo[b,f][1,4]oxazepin-2-one (3ai)**

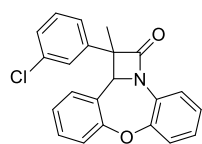

White solid, 44.5 mg, 82% yield, >20:1 d.r.; m.p.: 117-119 °C;  $^1\text{H}$  NMR (400 MHz,  $\text{CDCl}_3$ ):  $\delta$  (ppm) 7.74 (d,  $J = 5.5$  Hz, 1H), 7.57 (d,  $J = 1.9$  Hz, 1H), 7.52-7.47 (m, 1H), 7.41-7.11 (m, 9H), 5.38 (s, 1H), 1.63 (s, 3H);  $^{13}\text{C}$  NMR (100 MHz,  $\text{CDCl}_3$ ):  $\delta$  (ppm) 168.6, 155.8, 150.4, 142.8, 134.9, 130.3, 129.8, 128.9, 127.9, 127.8, 127.5, 126.3, 126.3, 125.2, 124.6, 124.2, 122.5, 121.6, 64.9, 64.0, 21.4; IR (KBr,  $\tilde{\nu}$ ,  $\text{cm}^{-1}$ ): 1750; HRMS (ESI) for:  $\text{C}_{22}\text{H}_{16}\text{ClNNaO}_2$   $[\text{M}+\text{Na}]^+$ : calcd 384.0762, found 384.0764.

**1-(3-bromophenyl)-1-methyl-1,12b-dihydro-2H-azeto[1,2-d]dibenzo[b,f][1,4]oxazepin-2-one (3aj)**

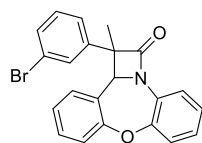

White solid, 54.2 mg, 89% yield; >20:1 d.r.; m.p.: 134-136 °C;  $^1\text{H}$  NMR (400 MHz,  $\text{CDCl}_3$ ):  $\delta$  (ppm) 7.77-7.70 (m, 2H), 7.55-7.47 (m, 2H), 7.39-7.12 (m, 8H), 5.39 (s, 1H), 1.63 (s, 3H);  $^{13}\text{C}$  NMR (100 MHz,  $\text{CDCl}_3$ ):  $\delta$  (ppm) 168.5, 155.8, 150.4, 143.1, 130.7, 130.5,

129.8, 129.2, 129.0, 127.9, 127.5, 126.3, 125.2, 124.7, 124.7, 124.6, 123.1, 122.6, 121.6, 64.9, 64.0, 21.5; **IR** (KBr,  $\tilde{\nu}$ ,  $\text{cm}^{-1}$ ): 1753; **HRMS** (ESI) for:  $\text{C}_{22}\text{H}_{17}\text{BrNO}_2$   $[\text{M}+\text{H}]^+$ : calcd 406.0437, found 406.0436.

**1-methyl-1-(m-tolyl)-1,12b-dihydro-2H-azeto[1,2-d]dibenzo[b,f][1,4]oxazepin-2-one (3ak)**

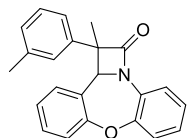

White solid, 46.1 mg, 90% yield, >20:1 d.r.; m.p.: 93-95 °C;  **$^1\text{H}$  NMR** (400 MHz,  $\text{CDCl}_3$ ):  $\delta$  (ppm) 7.76 (dd,  $J = 7.0, 2.3$  Hz, 1H), 7.47-7.10 (m, 11H), 5.42 (s, 1H), 2.41 (s, 3H), 1.64 (s, 3H);  **$^{13}\text{C}$  NMR** (100 MHz,  $\text{CDCl}_3$ ):  $\delta$  (ppm) 169.2, 155.8, 150.1, 140.9, 138.7, 129.5, 129.1, 128.8, 128.2, 127.9, 127.1, 126.7, 126.6, 125.1, 124.5, 124.4, 123.0, 122.4, 121.5, 64.9, 64.3, 21.7, 21.5; **IR** (KBr,  $\tilde{\nu}$ ,  $\text{cm}^{-1}$ ): 1751; **HRMS** (ESI) for:  $\text{C}_{23}\text{H}_{20}\text{NO}_2$   $[\text{M}+\text{H}]^+$ : calcd 342.1489, found 342.1487.

**1-(3-methoxyphenyl)-1-methyl-1,12b-dihydro-2H-azeto[1,2-d]dibenzo[b,f][1,4]oxazepin-2-one (3al)**

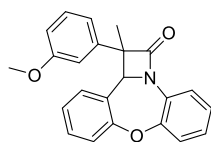

White solid, 50.9 mg, 95% yield, >20:1 d.r.; m.p.: 79-81 °C;  **$^1\text{H}$  NMR** (400 MHz,  $\text{CDCl}_3$ ):  $\delta$  (ppm) 7.74 (d,  $J = 7.4$  Hz, 1H), 7.40-7.23 (m, 5H), 7.20-7.11 (m, 5H), 6.90-6.85 (m, 1H), 5.40 (s, 1H), 3.85 (s, 3H), 1.63 (s, 3H);  **$^{13}\text{C}$  NMR** (100 MHz,  $\text{CDCl}_3$ ):  $\delta$  (ppm) 169.0, 159.9, 155.7, 150.2, 142.5, 130.0, 129.5, 129.0, 127.9, 127.2, 126.5, 125.0, 124.5, 124.5, 122.4, 121.5, 118.2, 112.5, 112.0, 64.9, 64.3, 55.3, 21.6; **IR** (KBr,  $\tilde{\nu}$ ,  $\text{cm}^{-1}$ ): 1755; **HRMS** (ESI) for:  $\text{C}_{23}\text{H}_{20}\text{NO}_3$   $[\text{M}+\text{H}]^+$ : calcd 358.1438, found 358.1439.

**1-(2-chlorophenyl)-1-methyl-1,12b-dihydro-2H-azeto[1,2-d]dibenzo[b,f][1,4]oxazepin-2-one (3am)**

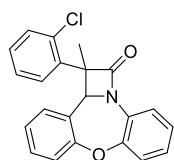

White solid, 47.8 mg, 88% yield, >20:1 d.r.; m.p.: 85-87 °C;  **$^1\text{H}$  NMR** (400 MHz,  $\text{CDCl}_3$ ):  $\delta$  (ppm) 8.01 (d,  $J = 7.8$  Hz, 1H), 7.95-7.91 (m, 1H), 7.43-7.38 (m, 1H), 7.31 (t,  $J = 4.7$  Hz, 2H), 7.26-7.01 (m, 5H), 6.85-6.81 (m, 1H), 6.58 (d,  $J = 7.8$  Hz, 1H), 5.76 (s, 1H), 2.18 (s, 3H);  **$^{13}\text{C}$  NMR** (100 MHz,  $\text{CDCl}_3$ ):  $\delta$  (ppm) 168.1, 157.6, 146.1, 135.4, 134.0, 130.8, 130.0, 129.6, 129.4, 129.4, 127.5, 125.4, 125.2, 125.1, 124.9, 121.3, 121.3, 121.1, 63.8, 62.1, 24.9; **IR** (KBr,  $\tilde{\nu}$ ,  $\text{cm}^{-1}$ ): 1744; **HRMS** (ESI) for:  $\text{C}_{22}\text{H}_{17}\text{ClNO}_2$   $[\text{M}+\text{H}]^+$ : calcd 362.0942, found 362.0945.

**1-(3,4-dichlorophenyl)-1-methyl-1,12b-dihydro-2H-azeto[1,2-d]dibenzo[b,f][1,4]oxazepin-2-one (3an)**

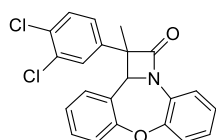

White solid, 55.9 mg, 94% yield; >20:1 d.r.; m.p.: 141-143 °C;  **$^1\text{H}$  NMR** (400 MHz,  $\text{CDCl}_3$ ):  $\delta$  (ppm) 7.73 (dd,  $J = 7.6, 1.9$  Hz, 1H), 7.68 (d,  $J = 2.1$  Hz, 1H), 7.53-7.42 (m, 2H), 7.38-7.13 (m, 7H), 5.35 (s, 1H), 1.61 (s, 3H);  **$^{13}\text{C}$  NMR** (100 MHz,  $\text{CDCl}_3$ ):  $\delta$  (ppm) 168.2, 155.7, 150.4, 141.0, 133.1, 131.7, 130.9, 129.9, 128.8, 128.1, 127.8, 127.6, 126.0, 125.5, 125.2, 124.7, 124.6, 122.6, 121.6, 64.8, 63.5, 21.4; **IR** (KBr,  $\tilde{\nu}$ ,  $\text{cm}^{-1}$ ): 1765; **HRMS** (ESI) for:  $\text{C}_{22}\text{H}_{16}\text{Cl}_2\text{NO}_2$   $[\text{M}+\text{H}]^+$ : calcd 396.0553, found 396.0556.

**1-methyl-1-(naphthalen-2-yl)-1,12b-dihydro-2H-azeto[1,2-d]dibenzo[b,f][1,4]oxazepin-2-one (3ao)**

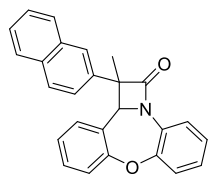

White solid, 47.6 mg, 84% yield; >20:1 d.r.; m.p.: 123-125 °C;  $^1\text{H NMR}$  (400 MHz,  $\text{CDCl}_3$ ):  $\delta$  (ppm) 8.07 (s, 1H), 7.96-7.84 (m, 3H), 7.79 (dd,  $J = 7.3, 2.1$  Hz, 1H), 7.68 (dd,  $J = 8.6, 1.9$  Hz, 1H), 7.58-7.06 (m, 9H), 5.51 (s, 1H), 1.74 (s, 3H);  $^{13}\text{C NMR}$  (100 MHz,  $\text{CDCl}_3$ ):  $\delta$  (ppm) 169.2, 155.8, 150.3, 138.2, 133.4, 132.6, 129.6, 129.2, 128.9, 128.1, 128.0, 127.7, 127.3, 126.7, 126.5, 126.2, 125.2, 124.7, 124.6, 124.1, 122.5, 121.5, 65.0, 64.6, 21.5; **IR** (KBr,  $\tilde{\nu}$ ,  $\text{cm}^{-1}$ ): 1749; **HRMS** (ESI) for:  $\text{C}_{26}\text{H}_{20}\text{NO}_2$   $[\text{M}+\text{H}]^+$ : calcd 378.1489, found 378.1488.

**1-(benzo[d][1,3]dioxol-5-yl)-1-methyl-1,12b-dihydro-2H-azeto[1,2-d]dibenzo[b,f][1,4]oxazepin-2-one (3ap)**

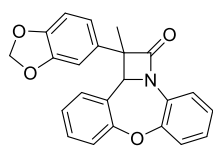

White solid, 50.1 mg, 90% yield; >20:1 d.r.; m.p.: 133-135 °C;  $^1\text{H NMR}$  (400 MHz,  $\text{CDCl}_3$ ):  $\delta$  (ppm) 7.74 (dd,  $J = 7.4, 1.9$  Hz, 1H), 7.37-7.02 (m, 9H), 6.86 (d,  $J = 8.0$  Hz, 1H), 5.98 (s, 2H), 5.33 (s, 1H), 1.60 (s, 3H);  $^{13}\text{C NMR}$  (100 MHz,  $\text{CDCl}_3$ ):  $\delta$  (ppm) 169.2, 155.6, 150.4, 148.1, 146.9, 134.7, 129.6, 129.1, 127.9, 127.3, 126.5, 125.1, 124.6, 124.5, 122.4, 121.5, 119.1, 108.6, 106.7, 101.2, 65.4, 64.1, 21.5; **IR** (KBr,  $\tilde{\nu}$ ,  $\text{cm}^{-1}$ ): 1751; **HRMS** (ESI) for:  $\text{C}_{23}\text{H}_{18}\text{NO}_4$   $[\text{M}+\text{H}]^+$ : calcd 372.1230, found 372.1236.

**1,1-diphenyl-1,12b-dihydro-2H-azeto[1,2-d]dibenzo[b,f][1,4]oxazepin-2-one (3aq)<sup>3</sup>**

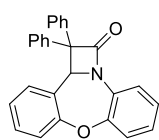

White solid, 57.2 mg, 98% yield; m.p.: 195-197 °C;  $^1\text{H NMR}$  (400 MHz,  $\text{CDCl}_3$ ):  $\delta$  (ppm) 8.07 (dd,  $J = 7.6, 2.2$  Hz, 1H), 7.70 (d,  $J = 7.6$  Hz, 2H), 7.49 (t,  $J = 7.5$  Hz, 2H), 7.41 (t,  $J = 7.3$  Hz, 1H), 7.31-7.23 (m, 1H), 7.22-7.10 (m, 7H), 7.04 (d,  $J = 6.3$  Hz, 2H), 6.76 (t,  $J = 7.5$  Hz, 1H), 6.38 (d,  $J = 7.8$  Hz, 1H), 6.18 (s, 1H);  $^{13}\text{C NMR}$  (100 MHz,  $\text{CDCl}_3$ ):  $\delta$  (ppm) 166.7, 157.5, 147.0, 138.6, 137.8, 129.4, 129.2, 129.0, 128.8, 128.3, 128.1, 127.9, 127.8, 127.4, 125.9, 125.2, 124.0, 122.1, 121.6, 121.6, 72.2, 64.0; **IR** (KBr,  $\tilde{\nu}$ ,  $\text{cm}^{-1}$ ): 1758; **HRMS** (ESI) for:  $\text{C}_{27}\text{H}_{20}\text{NO}_2$   $[\text{M}+\text{H}]^+$ : calcd 390.1489, found 390.1485.

**1-phenyl-1,12b-dihydro-2H-azeto[1,2-d]dibenzo[b,f][1,4]oxazepin-2-one (3ar)**

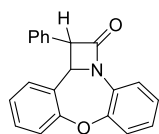

White solid, 42.3 mg, 90% yield; >20:1 d.r.; m.p.: 112-114 °C;  $^1\text{H NMR}$  (400 MHz,  $\text{CDCl}_3$ ):  $\delta$  (ppm) 8.09 (d,  $J = 8.0$  Hz, 1H), 7.58-7.19 (m, 10H), 7.09 (t,  $J = 7.7$  Hz, 1H), 7.01 (t,  $J = 7.7$  Hz, 1H), 5.68 (d,  $J = 2.9$  Hz, 1H), 4.84 (d,  $J = 3.0$  Hz, 1H);  $^{13}\text{C NMR}$  (100 MHz,  $\text{CDCl}_3$ ):  $\delta$  (ppm) 163.9, 158.3, 144.0, 134.1, 130.4, 130.4, 130.0, 129.1, 128.0, 127.5, 126.2, 125.3, 125.3, 124.4, 121.7, 121.6, 120.1, 60.2, 58.6; **IR** (KBr,  $\tilde{\nu}$ ,  $\text{cm}^{-1}$ ): 1756; **HRMS** (ESI) for:  $\text{C}_{21}\text{H}_{16}\text{NO}_2$   $[\text{M}+\text{H}]^+$ : calcd 314.1176, found 314.1175.

**1-benzyl-1-phenyl-1,12b-dihydro-2H-azeto[1,2-d]dibenzo[b,f][1,4]oxazepin-2-one (3as)**

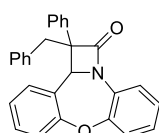

White solid, 38.1 mg, 63% yield; 1:1.7 d.r.; m.p.: 101-103 °C;  $^1\text{H NMR}$  (400 MHz,  $\text{CDCl}_3$ ):  $\delta$  (ppm) 7.58-6.97 (m, 16.45H, major+minor), 6.79-6.75 (m, 0.65H, minor), 6.68 (d,  $J = 7.4$  Hz, 0.71H, minor), 6.46



(d,  $J = 7.7$  Hz, 0.64H, minor), 5.32 (s, 0.35H, minor), 5.24 (s, 0.61H, major), 3.74-3.63 (m, 1.33H, major), 3.34-2.98 (m, 0.77H, minor);  $^{13}\text{C}$  NMR (100 MHz,  $\text{CDCl}_3$ ):  $\delta$  (ppm, major+minor) 168.3, 168.0, 156.1, 155.3, 153.3, 149.9, 139.1, 136.2, 135.9, 135.3, 130.7, 130.4, 129.7, 129.2, 128.9, 128.8, 128.7, 128.5, 128.4, 128.3, 127.8, 127.7, 127.4, 127.2, 127.0, 126.6, 126.5, 126.3, 125.7, 125.2, 125.0, 124.7, 123.9, 123.8, 122.9, 121.7, 121.5, 121.3, 69.2, 65.4, 61.1, 42.4, 39.8; **IR** (KBr,  $\tilde{\nu}$ ,  $\text{cm}^{-1}$ ): 1757; **HRMS** (ESI) for:  $\text{C}_{28}\text{H}_{22}\text{NO}_2$   $[\text{M}+\text{H}]^+$ : calcd 404.1645, found 404.1646.

**1-phenyl-1-propyl-1,12b-dihydro-2H-azeto[1,2-d]dibenzo[*b,f*][1,4]oxazepin-2-one (3at)**

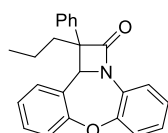

White solid, 34.7 mg, 65% yield; 1:1 d.r.; m.p.: 97-99 °C;  $^1\text{H}$  NMR (400 MHz,  $\text{CDCl}_3$ ):  $\delta$  (ppm, major+minor) 8.01-7.91 (m, 0.50H), 7.65-7.60 (m, 1.47H), 7.50-7.01 (m, 10.91H), 6.72 (t,  $J = 7.4$  Hz, 0.51H), 6.26 (d,  $J = 7.8$  Hz, 0.49H), 5.40 (s, 0.50H), 5.23 (s, 0.49H), 2.58-2.27 (m, 1.05H), 1.96-1.79 (m, 1.66H), 1.70-1.46 (m, 1.39H), 1.05 (t,  $J = 7.4$  Hz, 1.57H), 0.72 (t,  $J = 7.3$  Hz, 1.50H);  $^{13}\text{C}$  NMR (100 MHz,  $\text{CDCl}_3$ ):  $\delta$  (ppm, major+minor) 168.7, 168.6, 156.8, 155.4, 151.8, 148.5, 140.0, 136.0, 129.5, 129.0, 128.9, 128.8, 128.4, 128.3, 127.9, 127.8(8), 127.7(7), 127.7(0), 127.6(7), 127.6(1), 127.3, 126.6, 126.3, 126.3, 125.5, 125.2, 125.1, 124.5, 124.0, 123.1, 122.6, 121.5, 121.4(7), 121.4(4), 68.8, 68.4, 65.2, 63.6, 37.8, 37.5, 18.2, 18.0, 14.5, 14.3; **IR** (KBr,  $\tilde{\nu}$ ,  $\text{cm}^{-1}$ ): 1747; **HRMS** (ESI) for:  $\text{C}_{24}\text{H}_{22}\text{NO}_2$   $[\text{M}+\text{H}]^+$ : calcd 356.1645, found 356.1649.

**6-methyl-1,1-diphenyl-1,12b-dihydro-2H-azeto[1,2-d]dibenzo[*b,f*][1,4]oxazepin-2-one (3bq)**

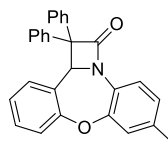

White solid, 53.3 mg, 88% yield; m.p.: 179-181 °C;  $^1\text{H}$  NMR (400 MHz,  $\text{CDCl}_3$ ):  $\delta$  (ppm) 7.88 (d,  $J = 8.1$  Hz, 1H), 7.70 (d,  $J = 7.5$  Hz, 2H), 7.48 (t,  $J = 7.5$  Hz, 2H), 7.40 (t,  $J = 7.4$  Hz, 1H), 7.20-7.00 (m, 8H), 6.95 (d,  $J = 8.1$  Hz, 1H), 6.75 (t,  $J = 7.4$  Hz, 1H), 6.42 (d,  $J = 7.7$  Hz, 1H), 6.09 (s, 1H), 2.32 (s, 3H);  $^{13}\text{C}$  NMR (100 MHz,  $\text{CDCl}_3$ ):  $\delta$  (ppm) 166.6, 157.2, 147.5, 138.7, 137.9, 136.5, 129.1, 128.9, 128.8, 128.3(0), 128.2(5), 128.1(9), 127.8, 127.7, 127.1, 126.6, 125.7, 123.9, 122.2, 121.9, 121.7, 72.4, 64.0, 21.0; **IR** (KBr,  $\tilde{\nu}$ ,  $\text{cm}^{-1}$ ): 1755; **HRMS** (ESI) for:  $\text{C}_{28}\text{H}_{22}\text{NO}_2$   $[\text{M}+\text{H}]^+$ : calcd 404.1645, found 404.1640.

**6-fluoro-1,1-diphenyl-1,12b-dihydro-2H-azeto[1,2-d]dibenzo[*b,f*][1,4]oxazepin-2-one (3cq)**

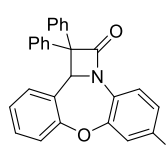

White solid, 60.5 mg, 99% yield; m.p.: 249-252 °C;  $^1\text{H}$  NMR (400 MHz,  $\text{CDCl}_3$ ):  $\delta$  (ppm) 8.04 (d,  $J = 8.6$  Hz, 1H), 7.67 (d,  $J = 7.5$  Hz, 2H), 7.51-7.40 (m, 3H), 7.28-7.09 (m, 7H), 7.01 (d,  $J = 7.2$  Hz, 2H), 6.82-6.70 (m, 1H), 6.34 (d,  $J = 7.8$  Hz, 1H), 6.18 (s, 1H);  $^{13}\text{C}$  NMR (100 MHz,  $\text{CDCl}_3$ ):  $\delta$  (ppm) 166.8, 160.0 (d,  $J = 247.1$  Hz), 156.6, 148.8 (d,  $J = 11.3$  Hz), 138.5, 137.6, 129.3, 128.89, 128.85, 128.5, 128.27, 128.25, 127.9, 127.8, 126.8, 125.6 (d,  $J = 3$  Hz), 124.3, 123.6 (d,  $J = 9.5$  Hz), 121.7, 112.0 (d,  $J = 22.3$  Hz), 109.3 (d,  $J = 24.7$  Hz), 72.8, 64.1;  $^{19}\text{F}$  NMR (400 MHz,  $\text{CDCl}_3$ ):  $\delta$  (ppm) -113.61; **IR** (KBr,  $\tilde{\nu}$ ,  $\text{cm}^{-1}$ ): 1755; **HRMS** (ESI) for:  $\text{C}_{27}\text{H}_{19}\text{FNO}_2$   $[\text{M}+\text{H}]^+$ : calcd 408.1394, found 408.1393.

**6-chloro-1,1-diphenyl-1,12b-dihydro-2H-azeto[1,2-d]dibenzo[*b,f*][1,4]oxazepin-2-one (3dq)**

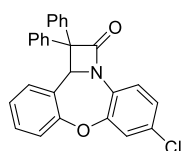

White solid, 63.5 mg, >99% yield; m.p.: 219-221 °C;  $^1\text{H NMR}$  (400 MHz,  $\text{CDCl}_3$ ):  $\delta$  (ppm) 7.98-7.94 (m, 1H), 7.70 (d,  $J = 7.5$  Hz, 2H), 7.52-7.40 (m, 3H), 7.16 (t,  $J = 4.0$  Hz, 6H), 7.04-6.98 (m, 3H), 6.93-6.74 (m, 3H), 6.47 (d,  $J = 7.7$  Hz, 1H), 6.08 (s, 1H);  $^{13}\text{C NMR}$  (100 MHz,  $\text{CDCl}_3$ ):  $\delta$  (ppm) 166.6, 157.2, 146.9, 138.4, 137.6, 130.1, 129.4, 129.0, 128.9, 128.4, 128.2, 128.1, 128.0, 127.3, 125.2, 124.3, 122.5, 122.0, 121.6, 72.3, 63.8; **IR** (KBr,  $\tilde{\nu}$ ,  $\text{cm}^{-1}$ ): 1756; **HRMS** (ESI) for:  $\text{C}_{27}\text{H}_{19}\text{ClNO}_2$   $[\text{M}+\text{H}]^+$ : calcd 424.1099, found 404.1091.

**5-methyl-1,1-diphenyl-1,12b-dihydro-2H-azeto[1,2-d]dibenzo[b,f][1,4]oxazepin-2-one (3eq)**

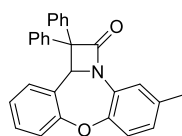

White solid, 54.5 mg, 90% yield; m.p.: 185-187 °C;  $^1\text{H NMR}$  (400 MHz,  $\text{CDCl}_3$ ):  $\delta$  (ppm) 7.89 (s, 1H), 7.75-7.64 (m, 2H), 7.54-7.37 (m, 3H), 7.23-7.10 (m, 6H), 7.08-7.02 (m, 2H), 6.91 (d,  $J = 8.2$  Hz, 1H), 6.75 (t,  $J = 7.3$  Hz, 1H), 6.37 (d,  $J = 7.8$  Hz, 1H), 6.15 (s, 1H);  $^{13}\text{C NMR}$  (100 MHz,  $\text{CDCl}_3$ ):  $\delta$  (ppm) 166.7, 157.6, 145.0, 138.7, 137.9, 135.1, 129.2, 129.0, 128.9, 128.8, 128.3, 128.1, 127.8, 127.8, 127.4, 126.5, 123.9, 122.3, 121.6, 121.2, 72.1, 64.0, 20.8; **IR** (KBr,  $\tilde{\nu}$ ,  $\text{cm}^{-1}$ ): 1759; **HRMS** (ESI) for:  $\text{C}_{28}\text{H}_{22}\text{NO}_2$   $[\text{M}+\text{H}]^+$ : calcd 404.1645, found 404.1646.

**5-methoxy-1,1-diphenyl-1,12b-dihydro-2H-azeto[1,2-d]dibenzo[b,f][1,4]oxazepin-2-one (3fq)**

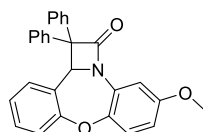

White solid, 52.2 mg, 83% yield; m.p.: 137-140 °C;  $^1\text{H NMR}$  (400 MHz,  $\text{CDCl}_3$ ):  $\delta$  (ppm) 7.70-7.68 (m, 3H), 7.50-7.39 (m, 3H), 7.25-7.10 (m, 6H), 7.05-7.04 (m, 2H), 6.82-6.71 (m, 1H), 6.64-6.61 (m, 1H), 6.32 (d,  $J = 7.7$  Hz, 1H), 6.21 (s, 1H), 3.79 (s, 2H);  $^{13}\text{C NMR}$  (100 MHz,  $\text{CDCl}_3$ ):  $\delta$  (ppm) 166.8, 158.1, 156.6, 140.5, 138.6, 137.9, 129.7, 129.2, 129.0, 128.9, 128.3, 128.2, 128.0, 127.9, 127.6, 123.9, 122.2, 121.5, 111.8, 105.9, 72.0, 63.9, 55.8; **IR** (KBr,  $\tilde{\nu}$ ,  $\text{cm}^{-1}$ ): 1748; **HRMS** (ESI) for:  $\text{C}_{28}\text{H}_{22}\text{NO}_3$   $[\text{M}+\text{H}]^+$ : calcd 420.1594, found 420.1593.

**5-fluoro-1,1-diphenyl-1,12b-dihydro-2H-azeto[1,2-d]dibenzo[b,f][1,4]oxazepin-2-one (3gq)**

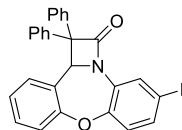

White solid, 61.1 mg, >99% yield; m.p.: 207-209 °C;  $^1\text{H NMR}$  (400 MHz,  $\text{CDCl}_3$ ):  $\delta$  (ppm) 7.91 (d,  $J = 9.0$  Hz, 1H), 7.67 (d,  $J = 7.5$  Hz, 1H), 7.51-7.40 (m, 3H), 7.29-7.14 (m, 6H), 7.03 (d,  $J = 7.3$  Hz, 2H), 6.78-6.75 (m, 2H), 6.29-6.26 (m, 2H);  $^{13}\text{C NMR}$  (100 MHz,  $\text{CDCl}_3$ ):  $\delta$  (ppm) 166.8, 159.2 (d,  $J = 243.8$  Hz), 157.9, 142.1, 138.3, 137.6, 130.1 (d,  $J = 11.7$  Hz), 129.4, 129.1, 128.9, 128.4, 128.2, 128.05, 127.99, 127.9, 127.8, 124.3, 122.5 (d,  $J = 9.5$  Hz), 121.49, 111.7 (d,  $J = 23.4$  Hz), 108.3 (d,  $J = 28.0$  Hz), 72.04, 63.82;  $^{19}\text{F NMR}$  (400 MHz,  $\text{CDCl}_3$ ):  $\delta$  (ppm) -115.57; **IR** (KBr,  $\tilde{\nu}$ ,  $\text{cm}^{-1}$ ): 1751; **HRMS** (ESI) for:  $\text{C}_{27}\text{H}_{19}\text{FNO}_2$   $[\text{M}+\text{H}]^+$ : calcd 408.1394, found 408.1399.

**5-chloro-1,1-diphenyl-1,12b-dihydro-2H-azeto[1,2-d]dibenzo[b,f][1,4]oxazepin-2-one (3hq)**

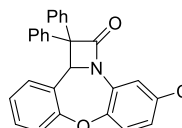

White solid, 63.6 mg, >99% yield; m.p.: 190-191 °C;  $^1\text{H NMR}$  (400 MHz,  $\text{CDCl}_3$ ):  $\delta$  (ppm) 8.17 (d,  $J = 2.4$  Hz, 1H), 7.67 (d,  $J = 7.6$  Hz, 2H), 7.51-7.41 (m, 3H), 7.25-7.15 (m, 6H), 7.06-7.01 (m, 3H), 6.77

(p,  $J = 3.9$  Hz, 1H), 6.30 (d,  $J = 7.8$  Hz, 1H), 6.23 (s, 1H);  $^{13}\text{C}$  NMR (100 MHz,  $\text{CDCl}_3$ ):  $\delta$  (ppm) 166.7, 157.5, 144.7, 138.3, 137.6, 130.2, 130.1, 129.4, 129.0, 128.9, 128.4, 128.2, 128.04, 128.01, 127.96, 127.5, 125.3, 124.3, 122.7, 121.5, 121.2, 72.1, 63.9; **IR** (KBr,  $\tilde{\nu}$ ,  $\text{cm}^{-1}$ ): 1750; **HRMS** (ESI) for:  $\text{C}_{27}\text{H}_{19}\text{ClNO}_2$   $[\text{M}+\text{H}]^+$ : calcd 424.1099, found 404.1106.

**5-bromo-1,1-diphenyl-1,12b-dihydro-2H-azeto[1,2-d]dibenzo[*b,f*][1,4]oxazepin-2-one (3iq)**

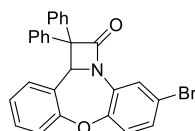

White solid, 70.2 mg, >99% yield; m.p.: 193-194 °C;  $^1\text{H}$  NMR (400 MHz,  $\text{CDCl}_3$ ):  $\delta$  (ppm) 8.31 (d,  $J = 2.2$  Hz, 1H), 7.75-7.64 (m, 2H), 7.51-7.40 (m, 3H), 7.29-7.11 (m, 7H), 7.02 (d,  $J = 7.2$  Hz, 2H), 6.79-6.75 (m, 1H), 6.31 (d,  $J = 7.8$  Hz, 1H), 6.22 (s, 1H);  $^{13}\text{C}$  NMR (100 MHz,  $\text{CDCl}_3$ ):  $\delta$  (ppm) 166.7, 157.4, 145.3, 138.3, 137.5, 130.5, 129.4, 129.0, 128.9, 128.39, 128.36, 128.2, 128.04, 128.01, 127.96, 127.5, 124.3, 124.1, 123.0, 121.6, 117.5, 72.2, 63.9; **IR** (KBr,  $\tilde{\nu}$ ,  $\text{cm}^{-1}$ ): 1756; **HRMS** (ESI) for:  $\text{C}_{27}\text{H}_{19}\text{BrNO}_2$   $[\text{M}+\text{H}]^+$ : calcd 468.0594, found 468.0597.

**10-methyl-1,1-diphenyl-1,12b-dihydro-2H-azeto[1,2-d]dibenzo[*b,f*][1,4]oxazepin-2-one (3jq)**

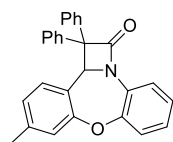

White solid, 57.5 mg, 95% yield; m.p.: 155-157 °C;  $^1\text{H}$  NMR (400 MHz,  $\text{CDCl}_3$ ):  $\delta$  (ppm) 8.08 (d,  $J = 7.9$  Hz, 1H), 7.68 (d,  $J = 7.6$  Hz, 2H), 7.49-7.37 (m, 3H), 7.27 – 7.00 (m, 9H), 6.56 (d,  $J = 7.9$  Hz, 1H), 6.20 (d,  $J = 7.9$  Hz, 1H), 6.15 (s, 1H), 2.22 (s, 3H);  $^{13}\text{C}$  NMR (100 MHz,  $\text{CDCl}_3$ ):  $\delta$  (ppm) 166.7, 157.4, 146.7, 139.5, 138.7, 137.9, 129.4, 129.0, 128.8, 128.2, 127.79, 127.76, 127.67, 125.7, 125.1, 124.7, 124.4, 122.1, 121.8, 121.5, 71.9, 63.8, 20.9; **IR** (KBr,  $\tilde{\nu}$ ,  $\text{cm}^{-1}$ ): 1759; **HRMS** (ESI) for:  $\text{C}_{28}\text{H}_{22}\text{NO}_2$   $[\text{M}+\text{H}]^+$ : calcd 404.1645, found 404.1649.

**10-fluoro-1,1-diphenyl-1,12b-dihydro-2H-azeto[1,2-d]dibenzo[*b,f*][1,4]oxazepin-2-one (3kq)**

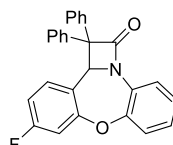

White solid, 59.9 mg, 98% yield; m.p.: 197-199 °C;  $^1\text{H}$  NMR (400 MHz,  $\text{CDCl}_3$ ):  $\delta$  (ppm) 8.06 (d,  $J = 7.6$  Hz, 1H), 7.67 (d,  $J = 7.5$  Hz, 2H), 7.50-7.39 (m, 3H), 7.30-7.09 (m, 6H), 7.02 (d,  $J = 7.0$  Hz, 2H), 6.92 (d,  $J = 9.2$  Hz, 1H), 6.48 (t,  $J = 8.4$  Hz, 1H), 6.32 (t,  $J = 7.5$  Hz, 1H), 6.10 (s, 1H);  $^{13}\text{C}$  NMR (100 MHz,  $\text{CDCl}_3$ ):  $\delta$  (ppm) 166.5, 162.2 (d,  $J = 249.6$  Hz), 158.1 (d,  $J = 10.8$  Hz), 146.5, 138.4, 137.6, 129.15, 129.07 (d,  $J = 4.7$  Hz), 128.9, 128.9, 128.4, 128.2, 128.0, 127.9, 126.0, 125.4, 123.4 (d,  $J = 3.8$  Hz), 122.1, 121.5, 111.0 (d,  $J = 21.1$  Hz), 109.5 (d,  $J = 23.2$  Hz), 72.3, 63.5;  $^{19}\text{F}$  NMR (400 MHz,  $\text{CDCl}_3$ ):  $\delta$  (ppm) -130.98; **IR** (KBr,  $\tilde{\nu}$ ,  $\text{cm}^{-1}$ ): 1750; **HRMS** (ESI) for:  $\text{C}_{27}\text{H}_{19}\text{FNO}_2$   $[\text{M}+\text{H}]^+$ : calcd 408.1394, found 408.1393.

**10-chloro-1,1-diphenyl-1,12b-dihydro-2H-azeto[1,2-d]dibenzo[*b,f*][1,4]oxazepin-2-one (3lq)**

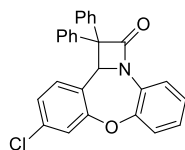

White solid, 63.5 mg, >99% yield; m.p.: 192-194 °C;  $^1\text{H}$  NMR (400 MHz,  $\text{CDCl}_3$ ):  $\delta$  (ppm) 8.11-8.03 (m, 1H), 7.67 (d,  $J = 7.7$  Hz, 2H), 7.57-7.37 (m, 3H), 7.30-7.10 (m, 6H), 7.02 (d,  $J = 7.3$  Hz, 2H), 6.75 (dd,  $J = 8.5, 2.0$  Hz, 1H), 6.28 (d,  $J = 8.5$  Hz, 1H), 6.11 (s, 1H);  $^{13}\text{C}$  NMR (100 MHz,  $\text{CDCl}_3$ ):  $\delta$  (ppm) 166.5, 157.7, 146.5, 138.3, 137.5, 134.2, 129.1,

128.9, 128.4, 128.2, 128.1, 128.0, 126.0, 125.5, 124.2, 122.2, 122.1, 121.5, 72.3, 63.5; **IR** (KBr,  $\tilde{\nu}$ ,  $\text{cm}^{-1}$ ): 1748; **HRMS** (ESI) for:  $\text{C}_{27}\text{H}_{18}\text{ClNNaO}_2$   $[\text{M}+\text{Na}]^+$ : calcd 446.0918, found 446.0927.

**10-bromo-1,1-diphenyl-1,12b-dihydro-2H-azeto[1,2-d]dibenzo[b,f][1,4]oxazepin-2-one (3mq)**

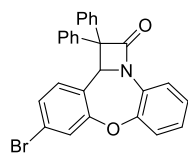

White solid, 70.2 mg, >99% yield; m.p.: 181-183 °C;  **$^1\text{H}$  NMR** (400 MHz,  $\text{CDCl}_3$ ):  $\delta$  (ppm) 8.07 (d,  $J = 7.7$  Hz, 1H), 7.66 (d,  $J = 7.6$  Hz, 2H), 7.52-7.33 (m, 4H), 7.28-7.08 (m, 6H), 7.02 (d,  $J = 7.1$  Hz, 2H), 6.89 (dd,  $J = 8.2, 1.9$  Hz, 1H), 6.21 (d,  $J = 8.3$  Hz, 1H), 6.09 (s, 1H);  **$^{13}\text{C}$  NMR** (100 MHz,  $\text{CDCl}_3$ ):  $\delta$  (ppm) 166.4, 157.7, 146.3, 138.3, 137.5, 129.1, 129.1, 128.9, 128.4, 128.2, 128.1, 128.0, 127.1, 126.6, 126.0, 125.5, 125.1, 122.0, 121.9, 121.5, 72.3, 63.5; **IR** (KBr,  $\tilde{\nu}$ ,  $\text{cm}^{-1}$ ): 1752; **HRMS** (ESI) for:  $\text{C}_{27}\text{H}_{19}\text{BrNO}_2$   $[\text{M}+\text{H}]^+$ : calcd 468.0594, found 468.0599.

**11-bromo-1,1-diphenyl-1,12b-dihydro-2H-azeto[1,2-d]dibenzo[b,f][1,4]oxazepin-2-one (3nq)**

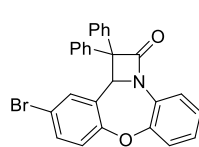

White solid, 66 mg, 94% yield; m.p.: 174-176 °C;  **$^1\text{H}$  NMR** (400 MHz,  $\text{CDCl}_3$ ):  $\delta$  (ppm) 8.06 (d,  $J = 7.7$  Hz, 1H), 7.67 (d,  $J = 7.5$  Hz, 2H), 7.54-7.36 (m, 3H), 7.27-7.21 (m, 5H), 7.18-7.01 (m, 5H), 6.38 (s, 1H), 6.12 (s, 1H);  **$^{13}\text{C}$  NMR** (100 MHz,  $\text{CDCl}_3$ ):  $\delta$  (ppm) 166.4, 156.4, 146.4, 138.2, 137.3, 132.0, 131.1, 129.4, 129.1, 128.91, 128.89, 128.5, 128.22, 128.19, 128.0, 126.0, 125.4, 123.3, 122.1, 121.4, 116.8, 72.4, 63.2; **IR** (KBr,  $\tilde{\nu}$ ,  $\text{cm}^{-1}$ ): 1756; **HRMS** (ESI) for:  $\text{C}_{27}\text{H}_{19}\text{BrNO}_2$   $[\text{M}+\text{H}]^+$ : calcd 468.0594, found 468.0596.

**1,1-diphenyl-11-(trifluoromethyl)-1,12b-dihydro-2H-azeto[1,2-d]dibenzo[b,f][1,4]oxazepin-2-one (3oq)**

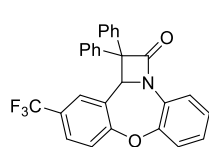

White solid, 63.1 mg, 92% yield; m.p.: 134-136 °C;  **$^1\text{H}$  NMR** (400 MHz,  $\text{CDCl}_3$ ):  $\delta$  (ppm) 8.08 (d,  $J = 7.6$  Hz, 1H), 7.69 (d,  $J = 7.6$  Hz, 2H), 7.50 (t,  $J = 7.5$  Hz, 2H), 7.44-7.39 (m, 2H), 7.30-7.10 (m, 7H), 7.02 (d,  $J = 7.3$  Hz, 2H), 6.57 (s, 1H), 6.16 (s, 1H);  **$^{13}\text{C}$  NMR** (100 MHz,  $\text{CDCl}_3$ ):  $\delta$  (ppm) 166.2, 159.6, 146.1, 138.1, 137.1, 129.0, 128.9, 128.8, 128.6, 128.3, 128.2, 128.1, 126.23 (q,  $J = 3.5$ ), 126.21, 126.1, 125.9, 125.7 (q,  $J = 3.6$ ), 125.5, 123.3 (q,  $J = 270$ ), 122.2, 122.1, 121.5, 72.6, 63.2;  **$^{19}\text{F}$  NMR** (400 MHz,  $\text{CDCl}_3$ ):  $\delta$  (ppm) -62.48; **IR** (KBr,  $\tilde{\nu}$ ,  $\text{cm}^{-1}$ ): 1754; **HRMS** (ESI) for:  $\text{C}_{28}\text{H}_{19}\text{F}_3\text{NO}_2$   $[\text{M}+\text{H}]^+$ : calcd 458.1362, found 458.1353.

**9-fluoro-1,1-diphenyl-1,12b-dihydro-2H-azeto[1,2-d]dibenzo[b,f][1,4]oxazepin-2-one (3pq)**

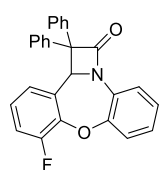

White solid, 61.1 mg, >99% yield; m.p.: 116-118 °C;  **$^1\text{H}$  NMR** (400 MHz,  $\text{CDCl}_3$ ):  $\delta$  (ppm) 8.09 (d,  $J = 7.7$  Hz, 1H), 7.68 (d,  $J = 7.5$  Hz, 2H), 7.56-7.33 (m, 4H), 7.23-7.11 (m, 5H), 7.04 (d,  $J = 7.2$  Hz, 2H), 6.97 (t,  $J = 9.1$  Hz, 1H), 6.70 (q,  $J = 7.5$  Hz, 1H), 6.21 (s, 1H), 6.11 (d,  $J = 7.9$  Hz, 1H);  **$^{13}\text{C}$  NMR** (100 MHz,  $\text{CDCl}_3$ ):  $\delta$  (ppm) 166.6, 154.4 (d,  $J = 249.6$  Hz), 146.4, 145.2 (d,  $J = 12.0$  Hz), 138.4, 137.7, 130.2, 129.5, 128.94, 128.91, 128.4, 128.2, 128.0, 125.9, 125.7, 124.3 (d,  $J = 7.5$  Hz), 122.9 (d,  $J = 3.9$  Hz), 122.0 (d,

$J = 9.1$  Hz), 116.2 (d,  $J = 18.8$  Hz), 72.3, 63.8;  $^{19}\text{F}$  NMR (400 MHz,  $\text{CDCl}_3$ ):  $\delta$  (ppm) -113.61; IR (KBr,  $\tilde{\nu}$ ,  $\text{cm}^{-1}$ ): 1749; HRMS (ESI) for:  $\text{C}_{27}\text{H}_{19}\text{FNO}_2$   $[\text{M}+\text{H}]^+$ : calcd 408.1394, found 408.1389.

#### 1,1-diphenyl-1,12b-dihydro-2H-azeto[1,2-d]dibenzo[*b,f*][1,4]thiazepin-2-one (3qq)

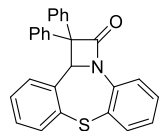

White solid, 60.8 mg, >99% yield; m.p.: 163-165 °C;  $^1\text{H}$  NMR (400 MHz,  $\text{CDCl}_3$ ):  $\delta$  (ppm) 7.92 (d,  $J = 7.9$  Hz, 1H), 7.72 (d,  $J = 7.6$  Hz, 2H), 7.57-7.36 (m, 5H), 7.30 (t,  $J = 7.7$  Hz, 1H), 7.22-7.02 (m, 7H), 6.98 (t,  $J = 7.6$  Hz, 1H), 6.70 (d,  $J = 7.7$  Hz, 1H), 6.34 (s, 1H);  $^{13}\text{C}$  NMR (100 MHz,  $\text{CDCl}_3$ ):  $\delta$  (ppm) 167.6, 139.1, 138.3, 138.1, 136.6, 134.2, 132.5, 132.0, 129.4, 129.3, 128.9, 128.8, 128.2, 128.1, 127.8, 127.7, 127.5, 127.4, 126.6, 124.2, 72.7, 67.1; IR (KBr,  $\tilde{\nu}$ ,  $\text{cm}^{-1}$ ): 1760; HRMS (ESI) for:  $\text{C}_{27}\text{H}_{20}\text{NOS}$   $[\text{M}+\text{H}]^+$ : calcd 406.1260, found 406.1264.

#### 5-Chloro-1,1-diphenyl-1,12b-dihydro-2H-azeto[1,2-d]dibenzo[*b,f*][1,4]thiazepin-2-one (3rq)

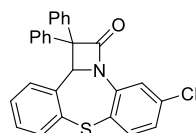

White solid, 64.7 mg, 98% yield; m.p.: 185-187 °C;  $^1\text{H}$  NMR (400 MHz,  $\text{CDCl}_3$ ):  $\delta$  (ppm) 8.10 (t,  $J = 2.0$  Hz, 1H), 7.68 (d,  $J = 8.0$  Hz, 2H), 7.53-7.38 (m, 5H), 7.23-6.90 (m, 8H), 6.59 (d,  $J = 7.8$  Hz, 1H), 6.51 (s, 1H);  $^{13}\text{C}$  NMR (100 MHz,  $\text{CDCl}_3$ ):  $\delta$  (ppm) 167.6, 139.0, 138.8, 138.0, 137.0, 135.0, 134.5, 132.9, 132.6, 129.0, 128.96, 128.90, 128.5, 128.3, 128.13, 128.08, 127.9, 127.8, 126.0, 123.6, 123.3, 72.3, 67.2; IR (KBr,  $\tilde{\nu}$ ,  $\text{cm}^{-1}$ ): 1770; HRMS (ESI) for:  $\text{C}_{27}\text{H}_{19}\text{ClNOS}$   $[\text{M}+\text{H}]^+$ : calcd 440.0870, found 440.0874.

## 5. X-ray crystal structure of 3aa

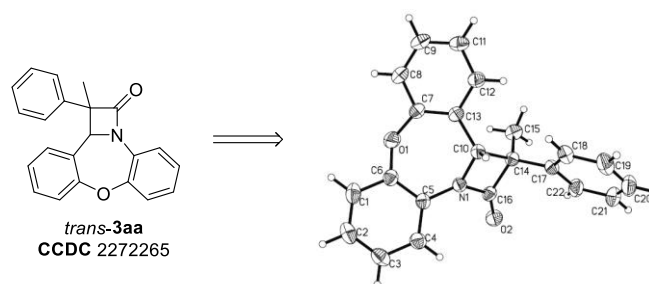

## References

- (a) G. J. Wang, Z. Q. Fu and W. Huang, *Org. Lett.*, 2017, **19**, 3362-3365; (b) M. Frías, A. C. Carrasco, A. *Chem. Eur. J.*, 2018, **24**, 3117-3121.
- (a) B. Xu, S. F. Zhu, X. D. Zuo, Z. C. Zhang and Q. L. Zhou, *Angew. Chem., Int. Ed.*, 2014, **53**, 3913-3916; (b) J. Yang, C. Q. Ke, X. H. Liu and X. M. Feng, *Org. Lett.*, 2018, **20**, 4536-4539.
- H. Yang, H.-J. Li, G. Wei and Z.-Y. Jiang, *Angew. Chem. Int. Ed.*, 2021, **60**, 19696-19700.

## 6. Copies of $^1\text{H}$ and $^{13}\text{C}$ NMR Spectra

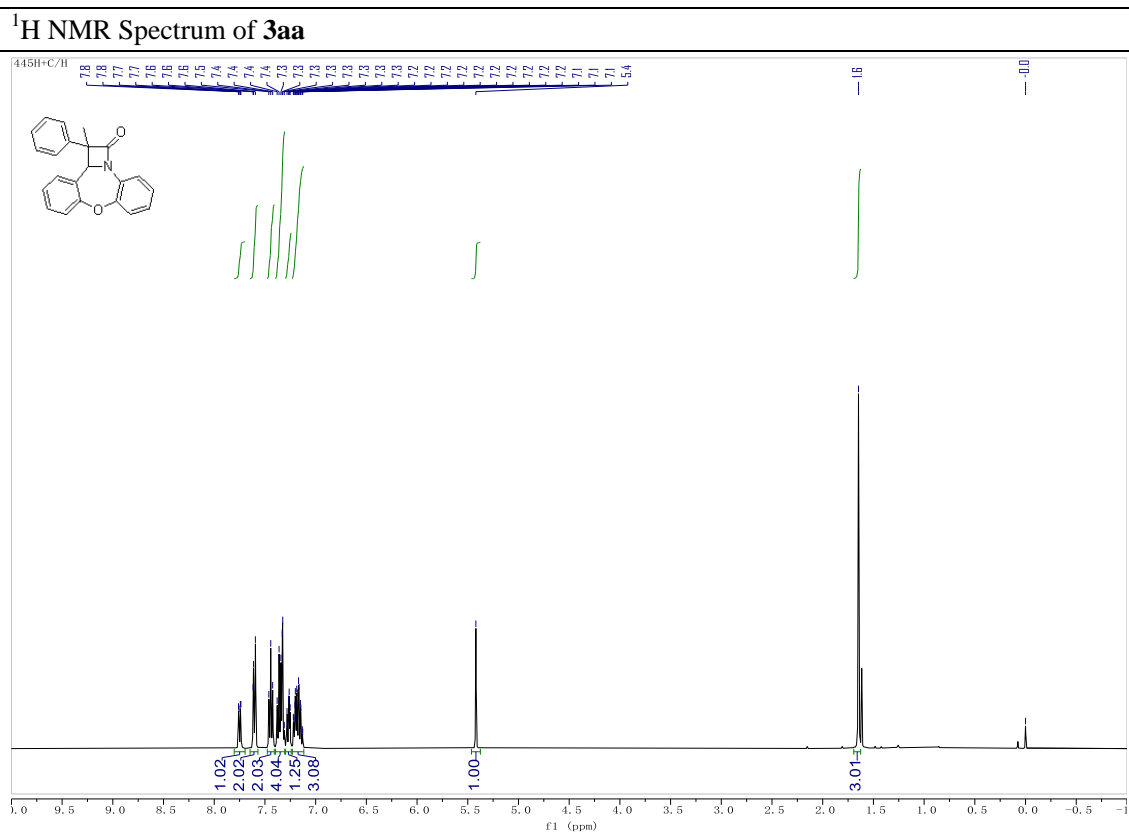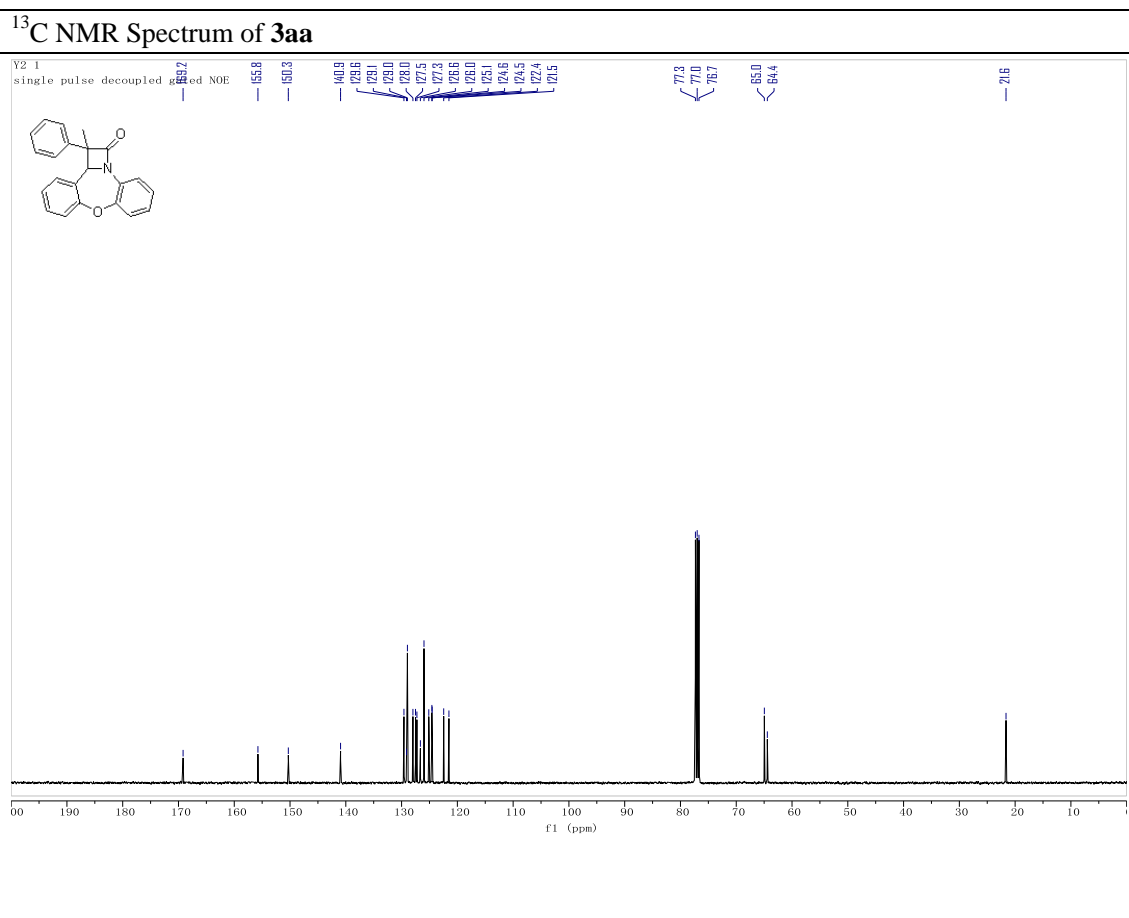

### <sup>1</sup>H NMR Spectrum of **3ab**

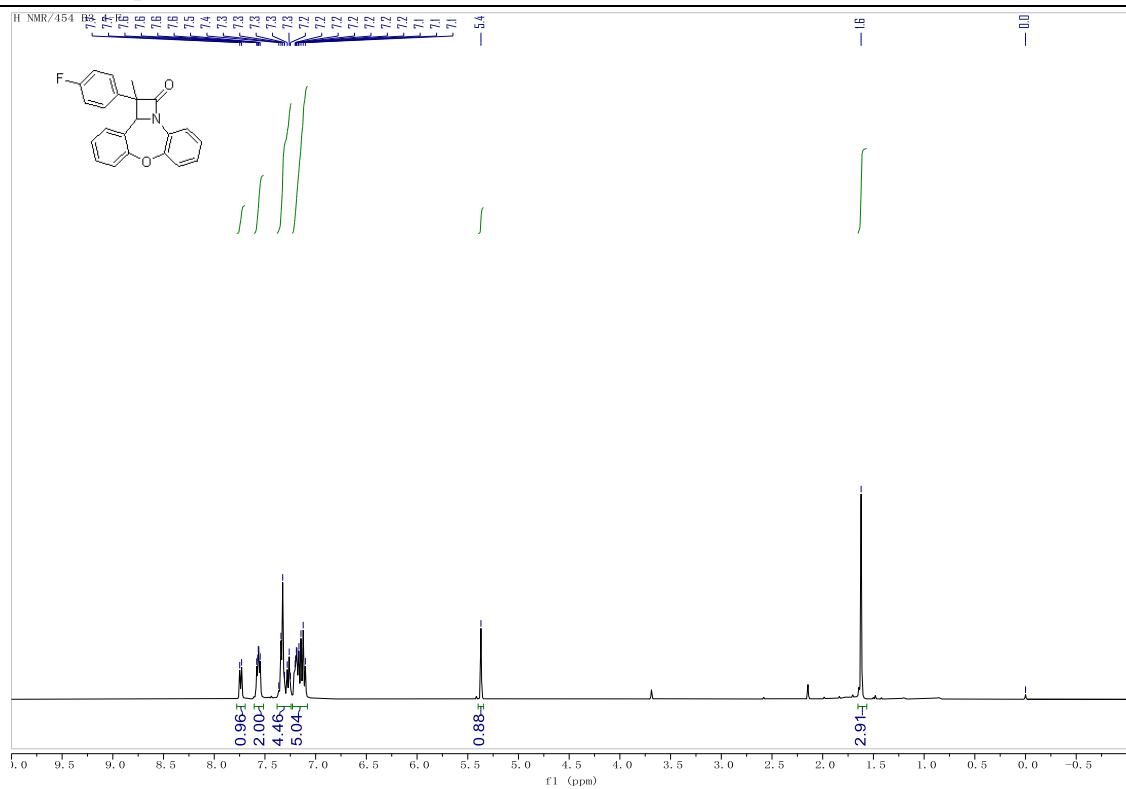

### <sup>13</sup>C NMR Spectrum of **3ab**

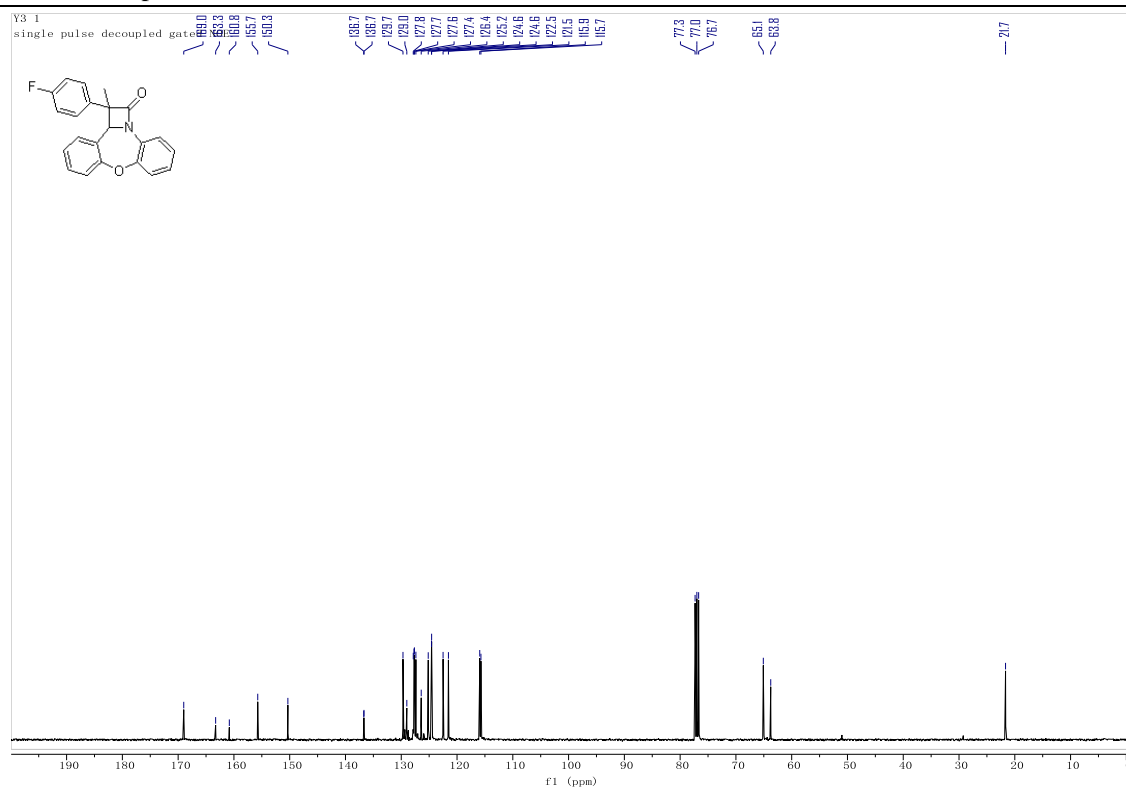

F NMR/454 B3 4-F

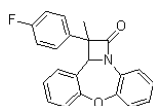

116.6

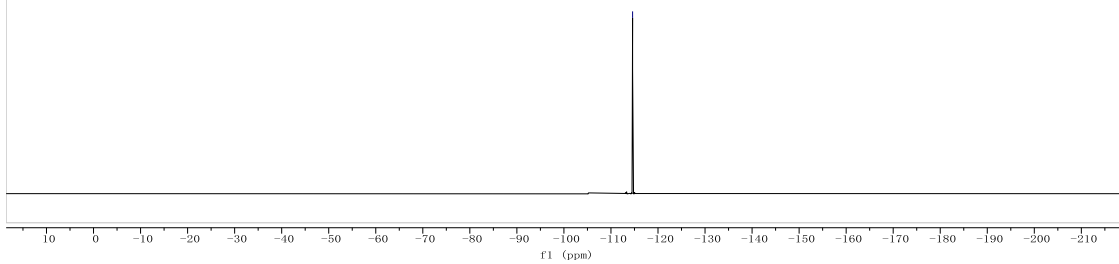



# <sup>1</sup>H NMR Spectrum of 3ac

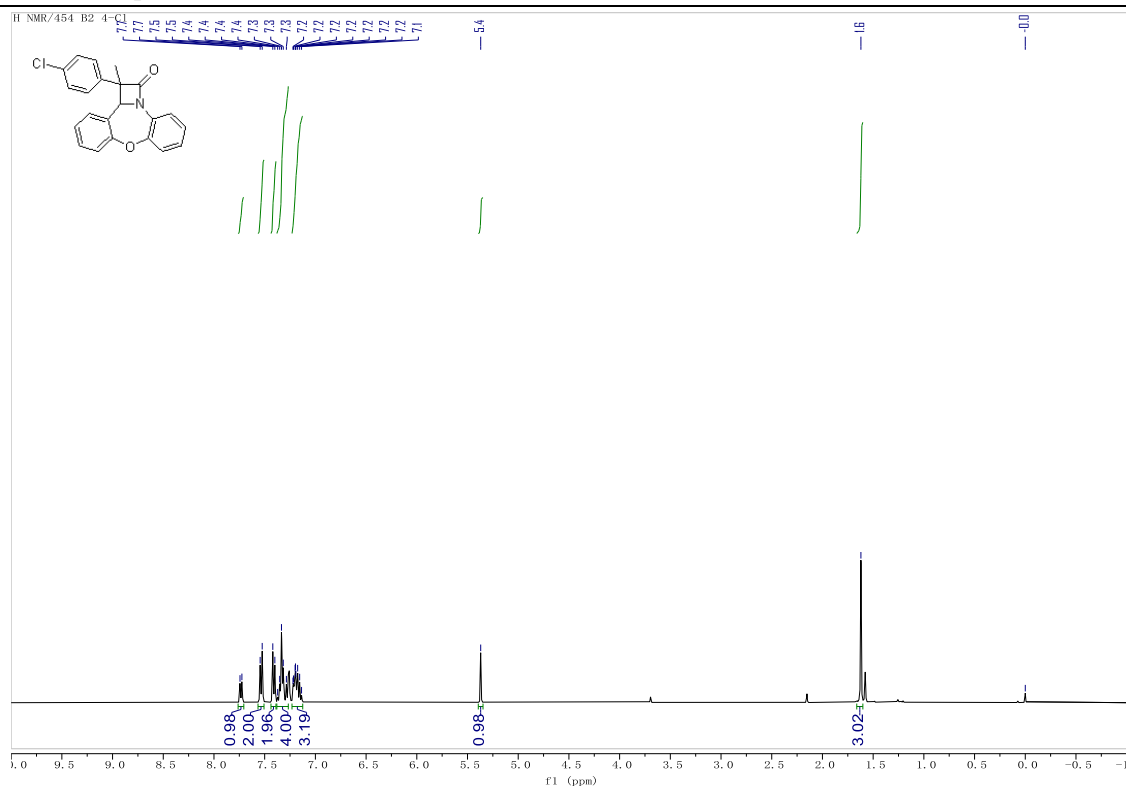

# <sup>13</sup>C NMR Spectrum of 3ac

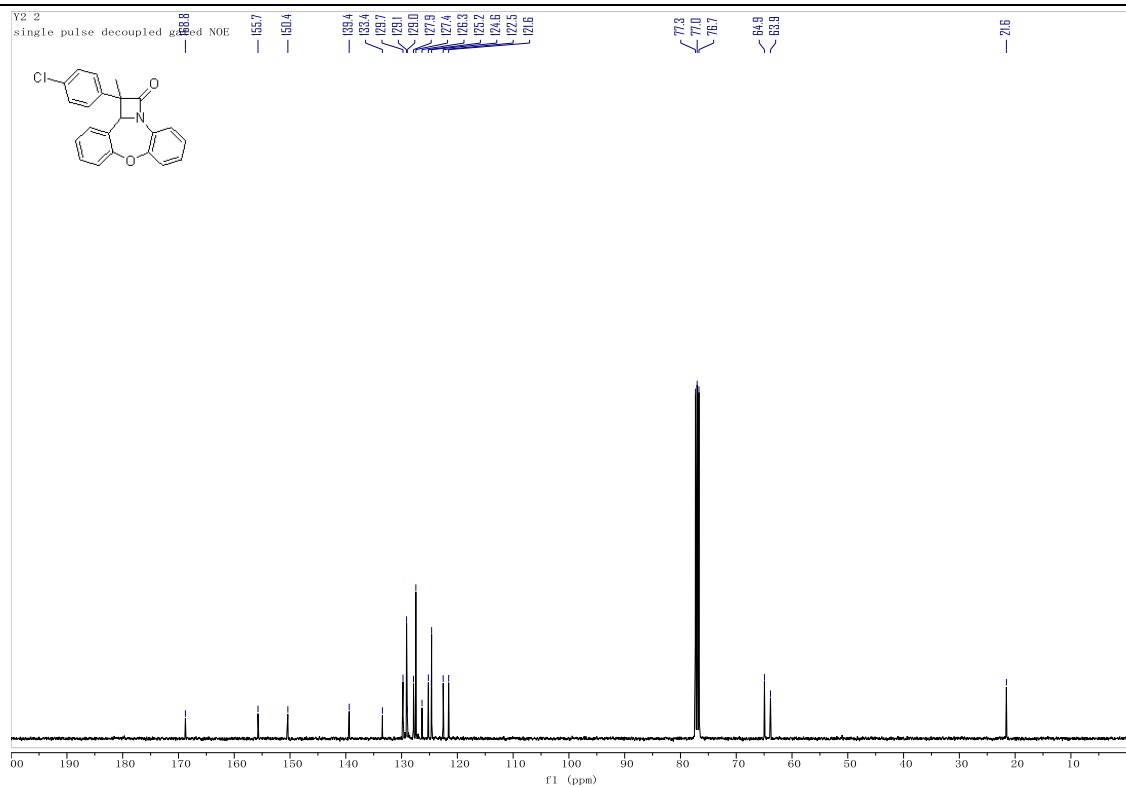

# <sup>1</sup>H NMR Spectrum of 3ad

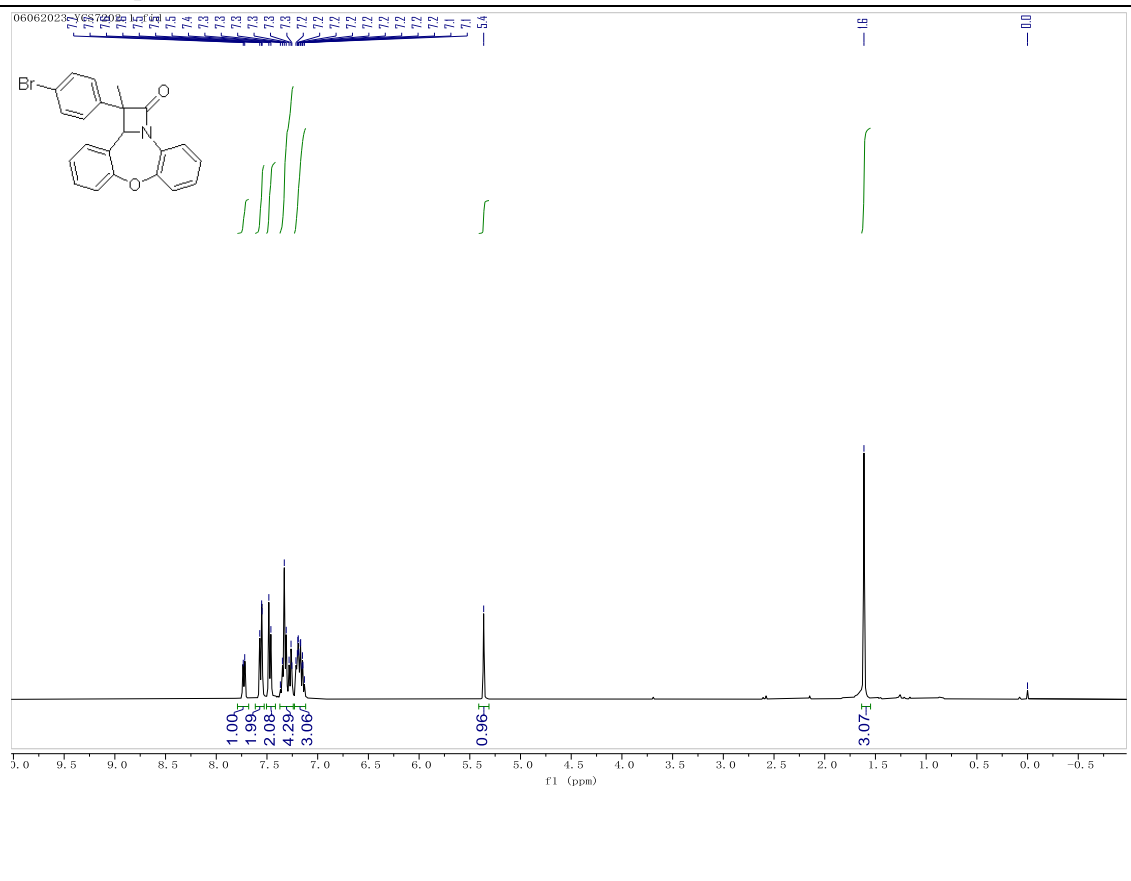

# <sup>13</sup>C NMR & F NMR Spectrum of 3ad

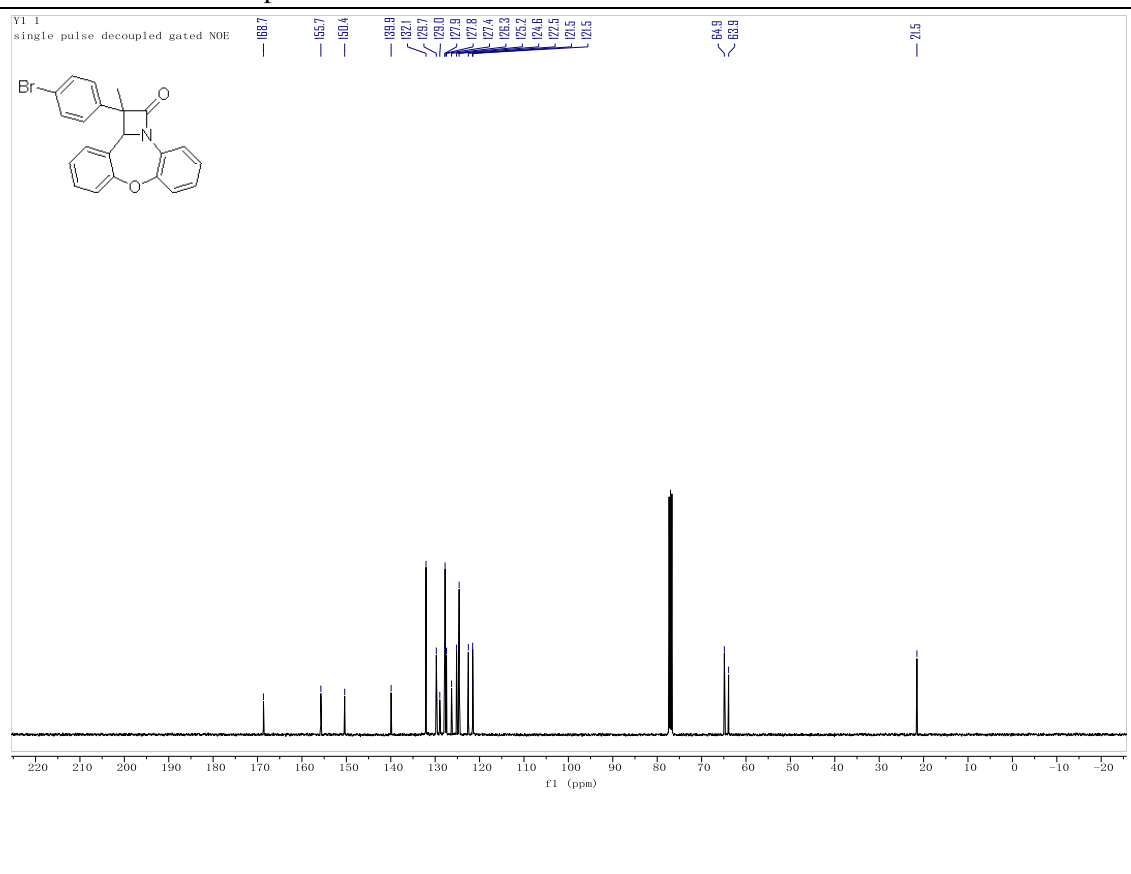

# <sup>1</sup>H NMR Spectrum of 3ae

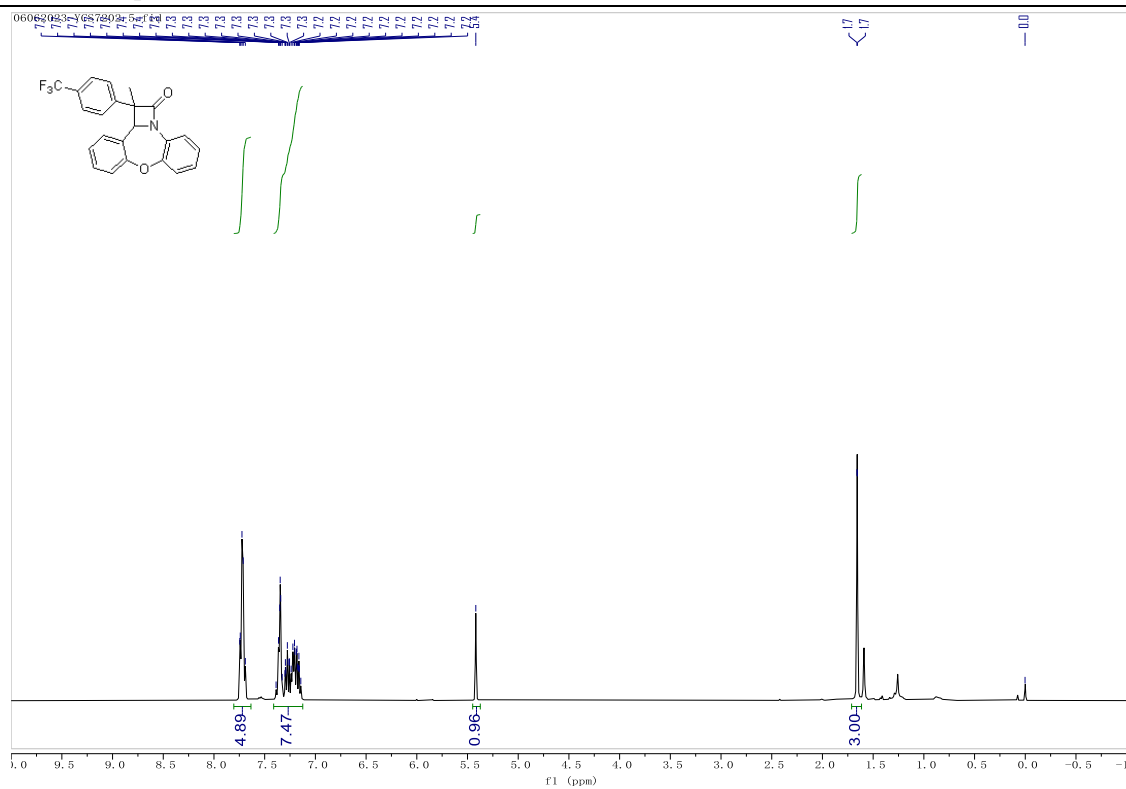

# <sup>13</sup>C NMR Spectrum of 3ae

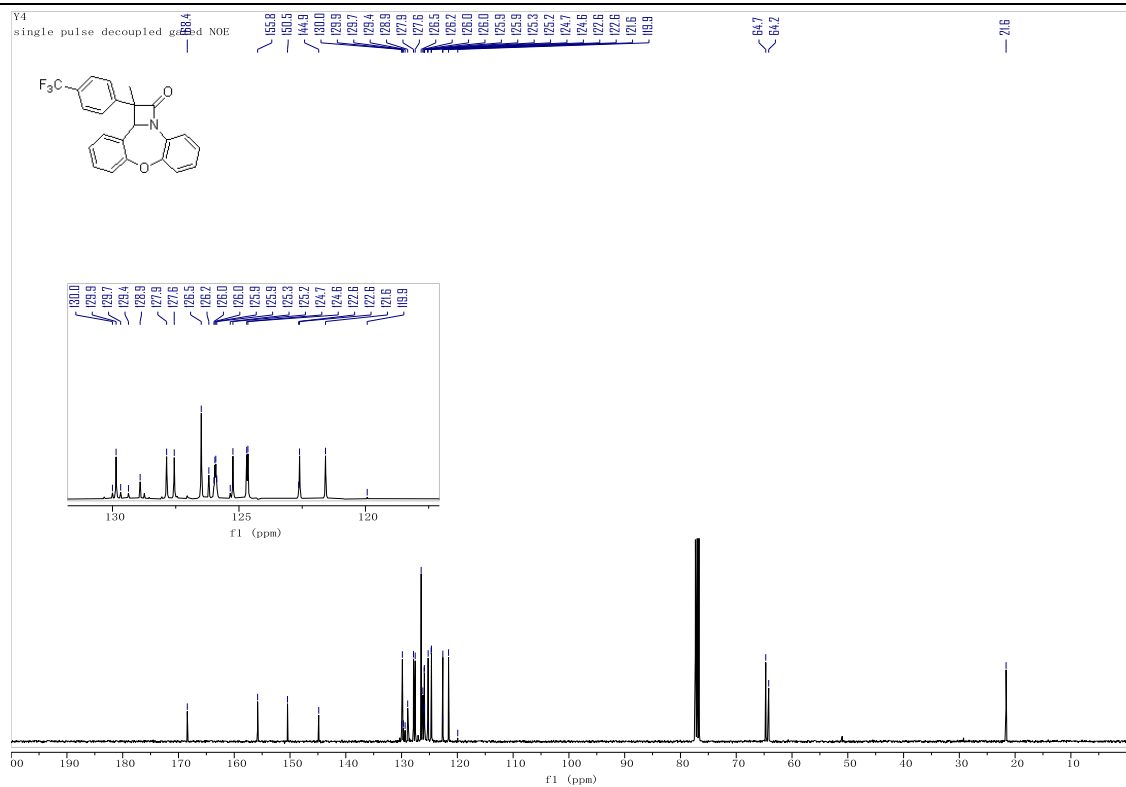

F NMR/454 B4 4-CF3

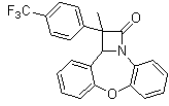

62.5

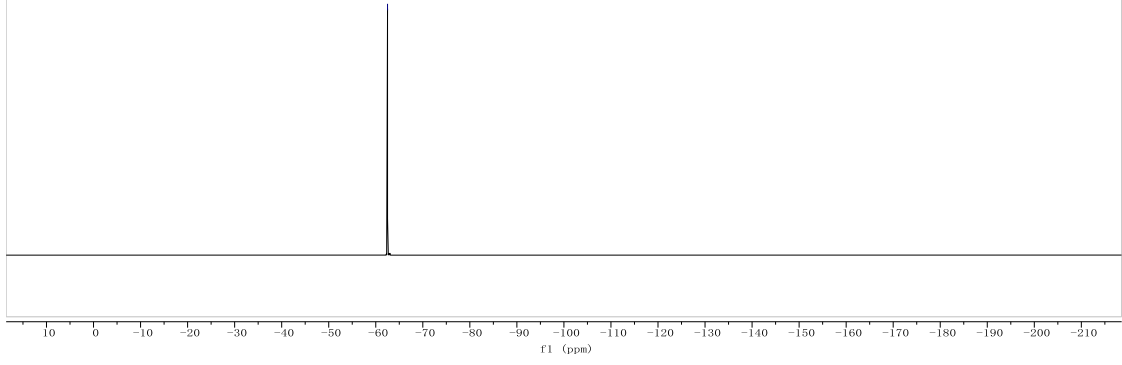

### <sup>1</sup>H NMR Spectrum of 3af

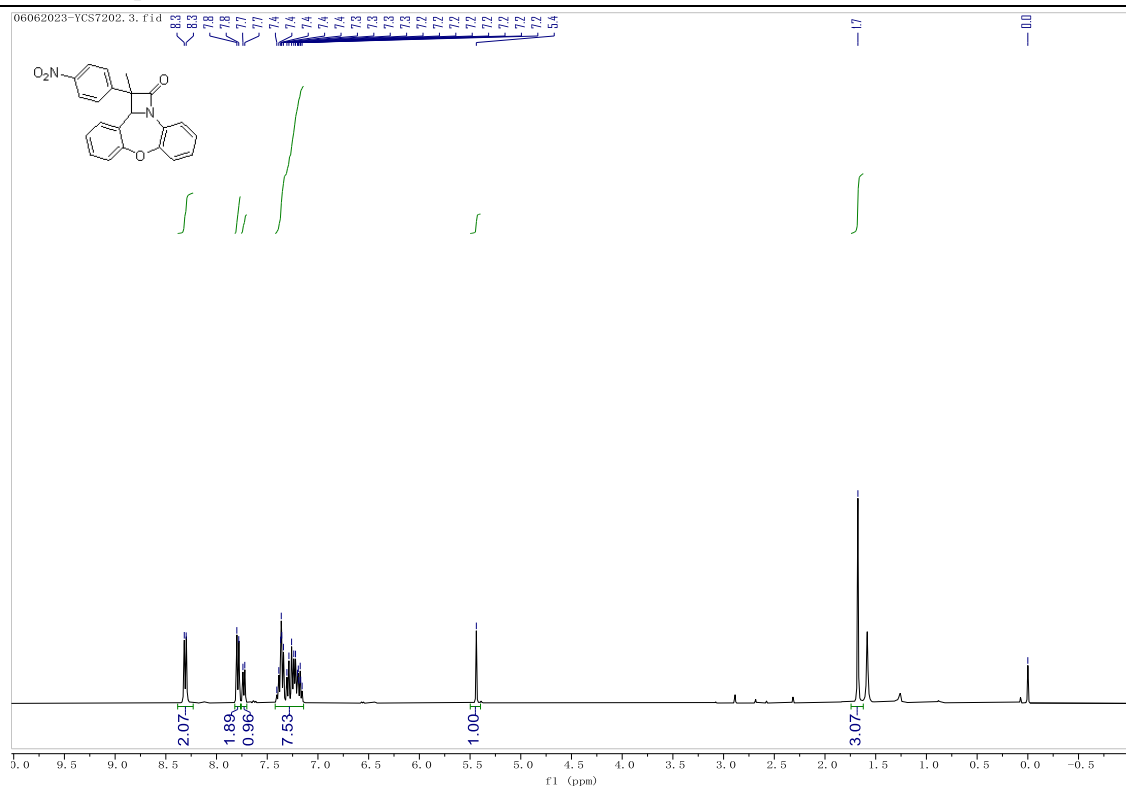

### <sup>13</sup>C NMR Spectrum of 3af

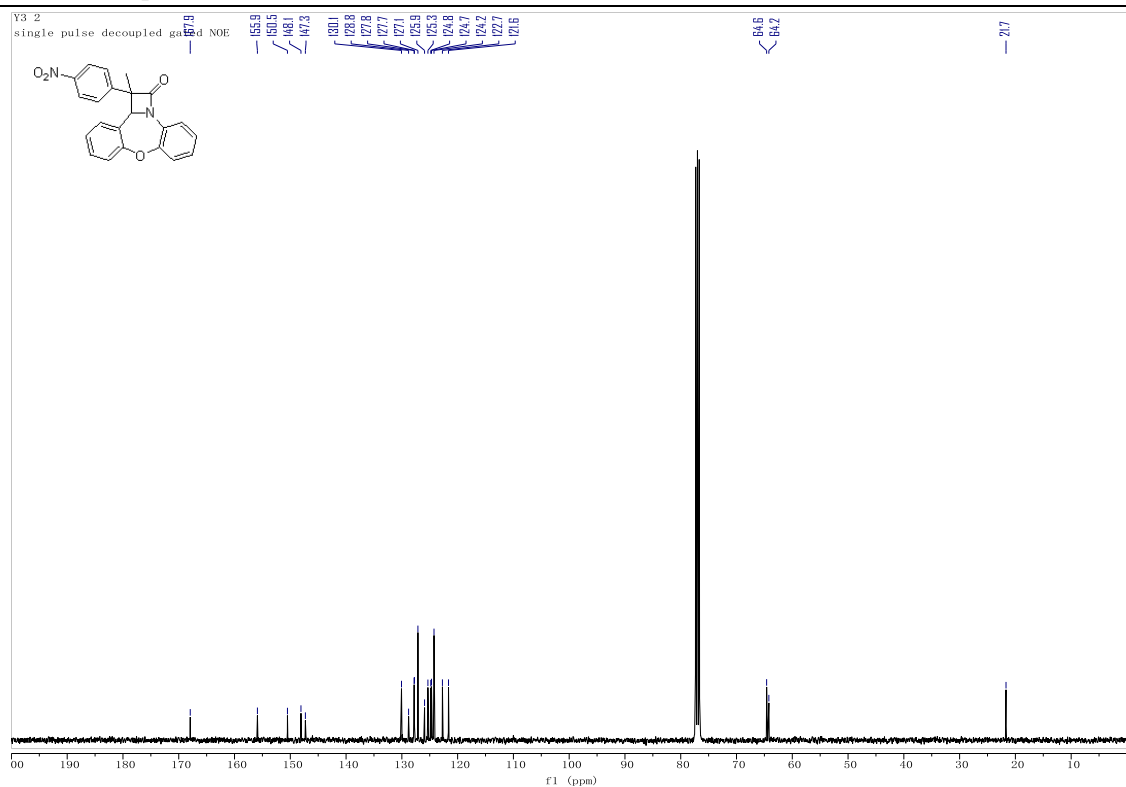

# <sup>1</sup>H NMR Spectrum of **3ag**

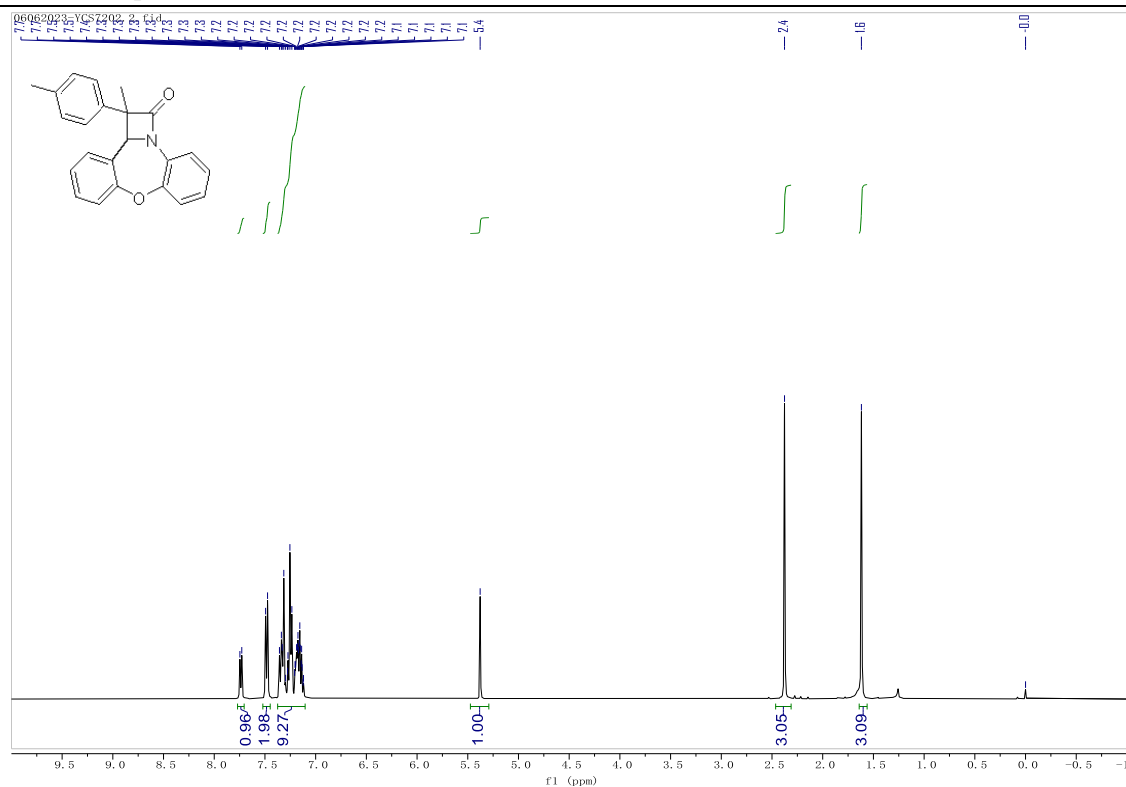

# <sup>13</sup>C NMR Spectrum of **3ag**

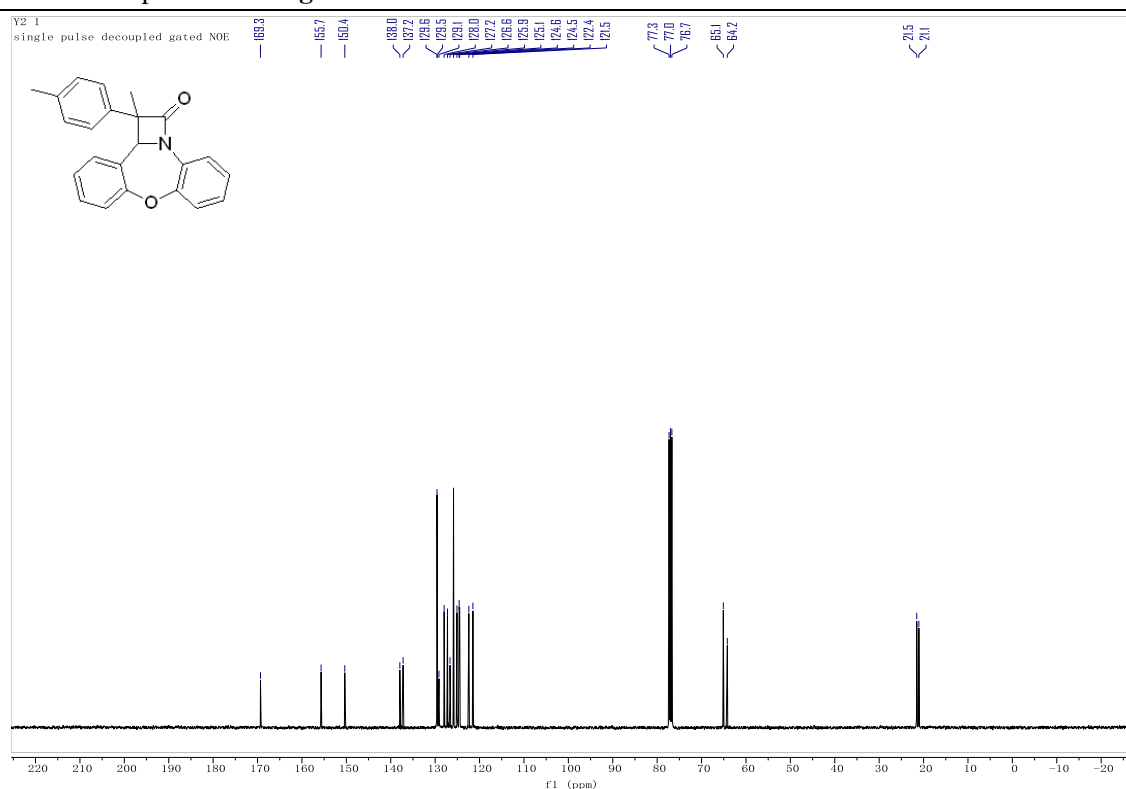

### <sup>1</sup>H NMR Spectrum of 3ah

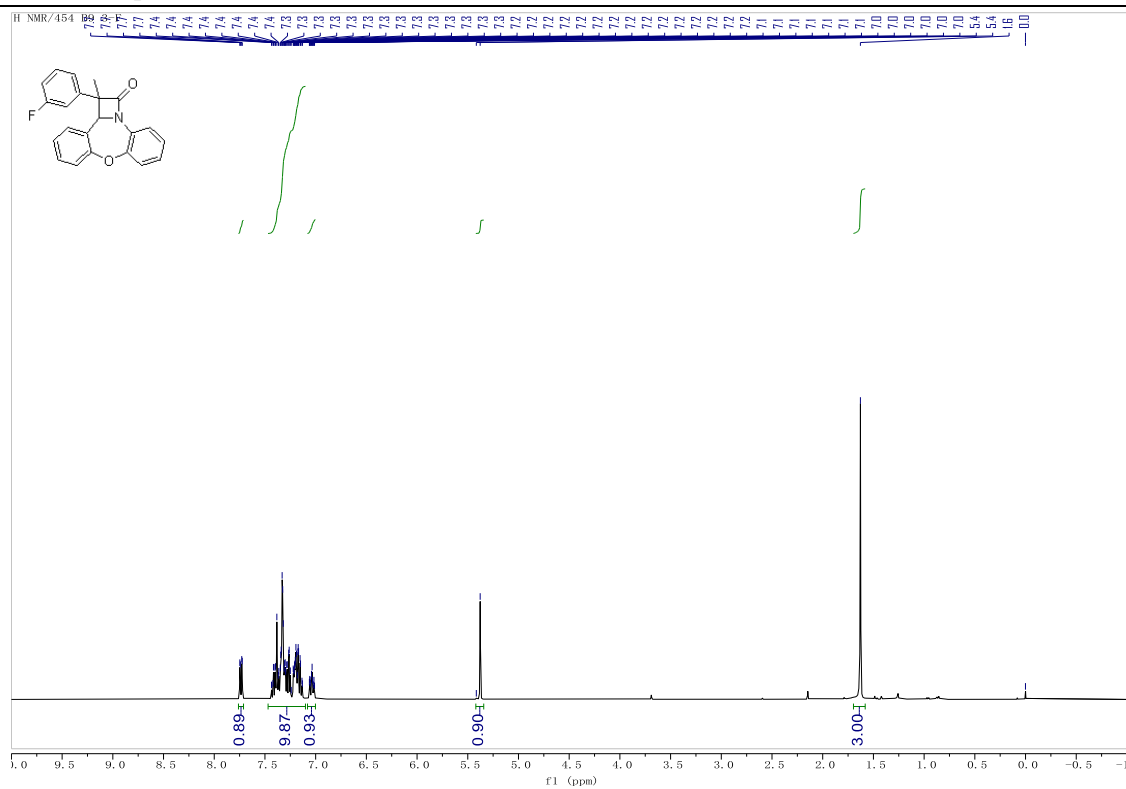

### <sup>13</sup>C NMR Spectrum of 3ah

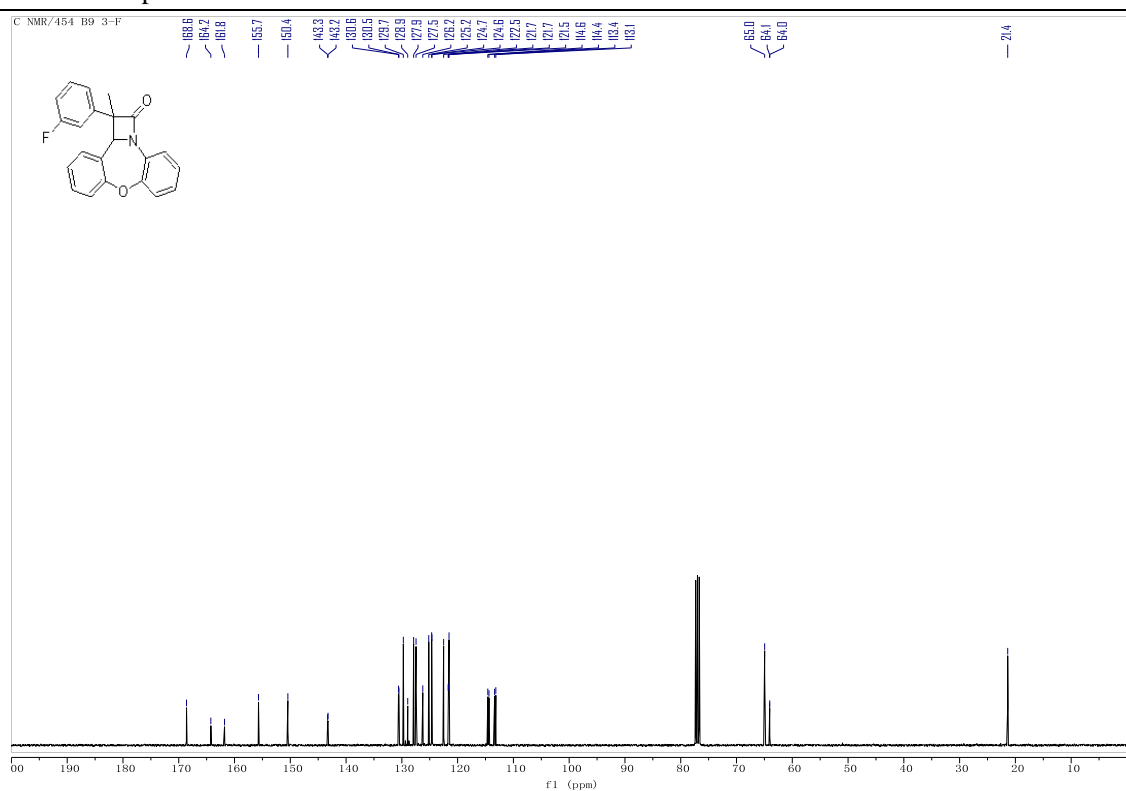

F NMR/454 B9 3-F

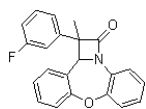

9.114

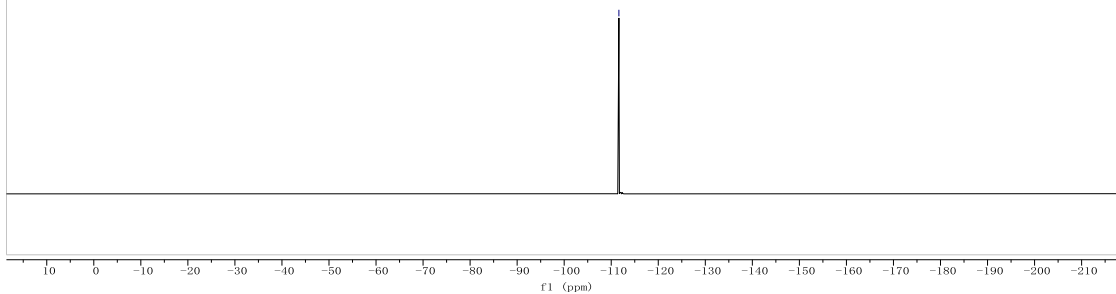



### <sup>1</sup>H NMR Spectrum of **3ai**

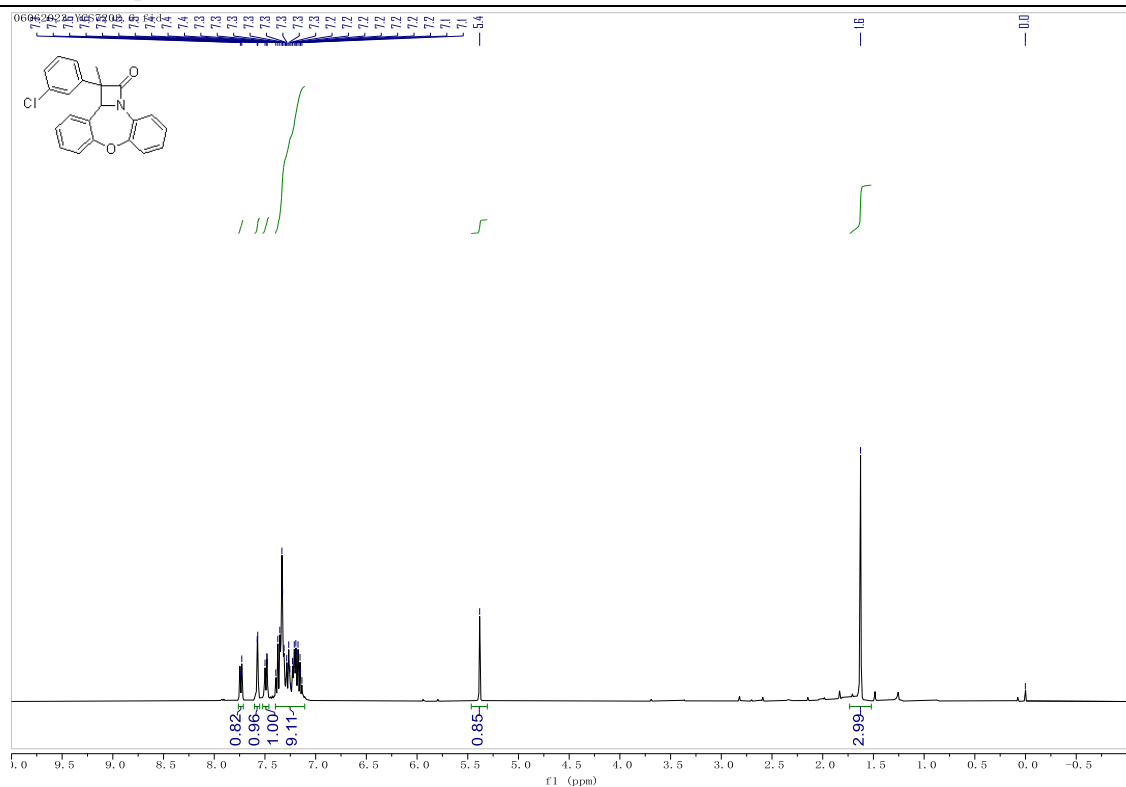

### <sup>13</sup>C NMR Spectrum of **3ai**

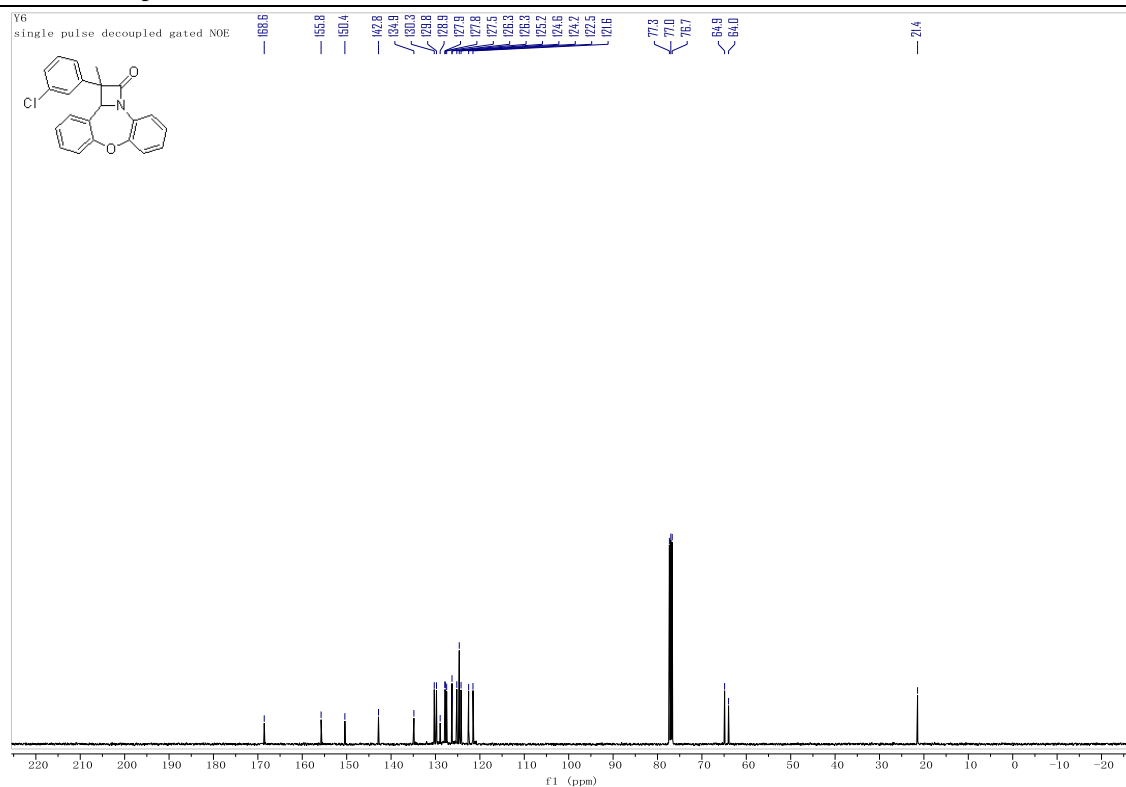

### <sup>1</sup>H NMR Spectrum of **3aj**

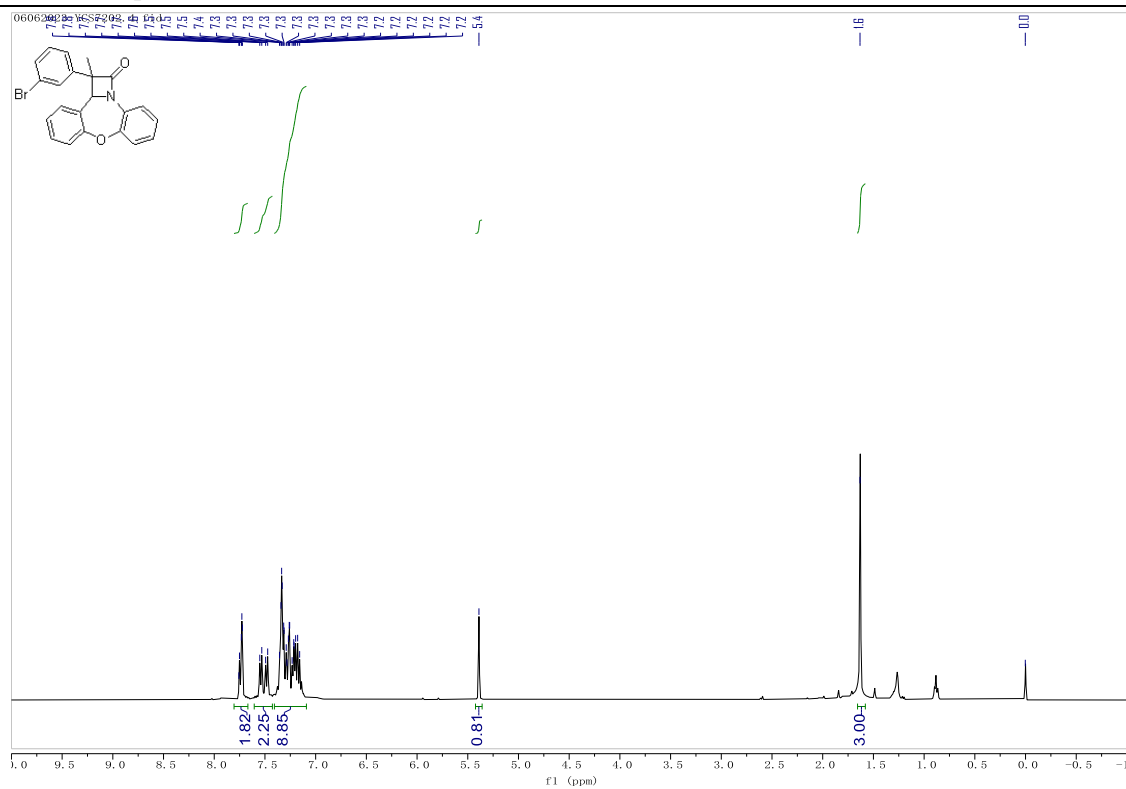

### <sup>13</sup>C NMR Spectrum of **3aj**

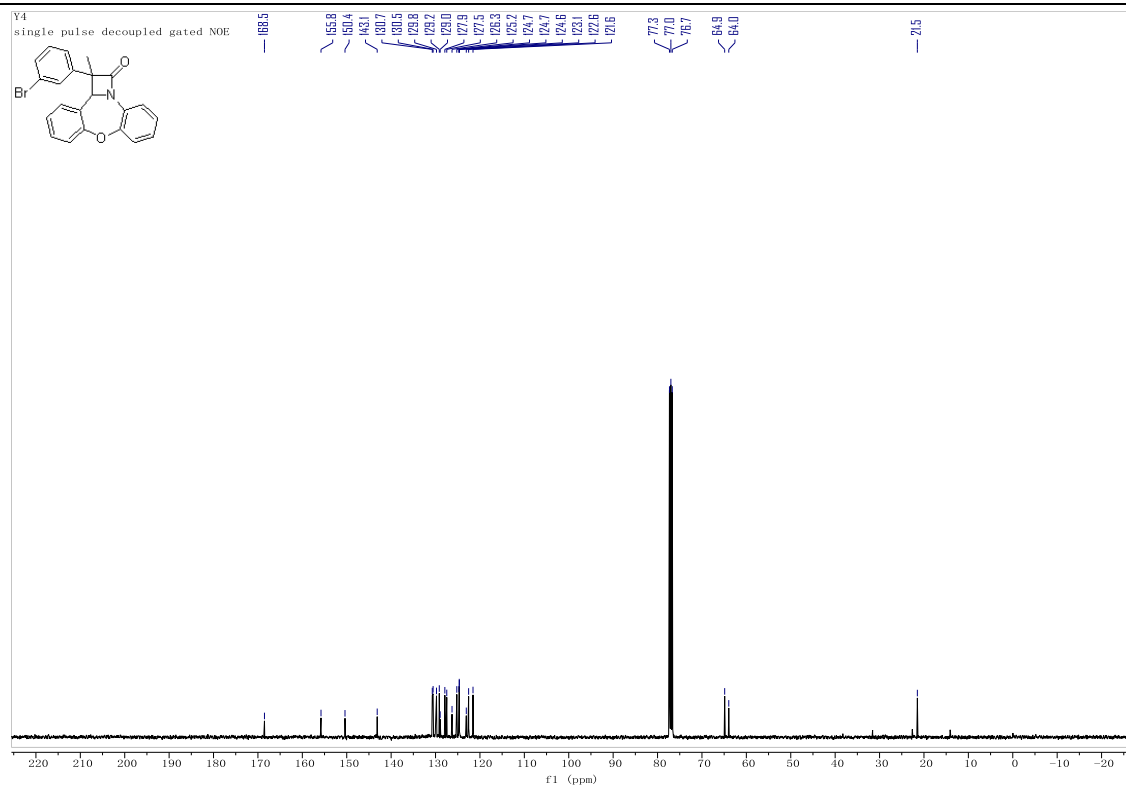

### <sup>1</sup>H NMR Spectrum of **3ak**

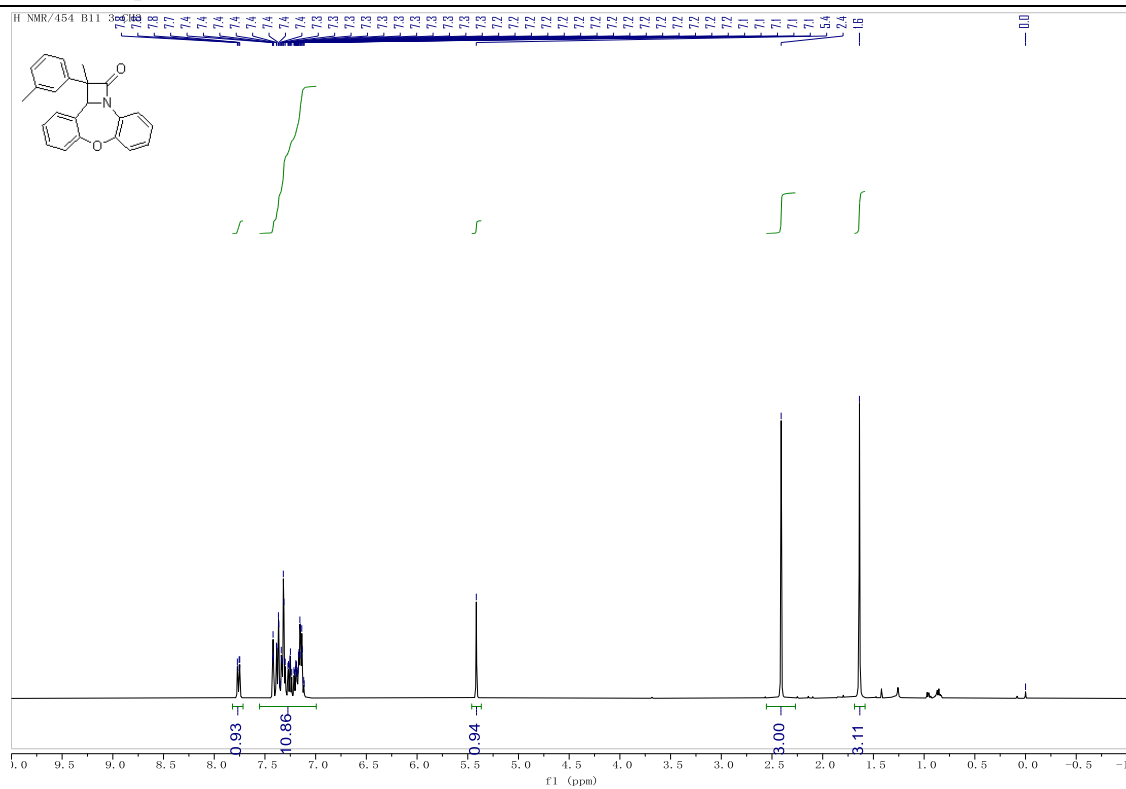

### <sup>13</sup>C NMR Spectrum of **3ak**

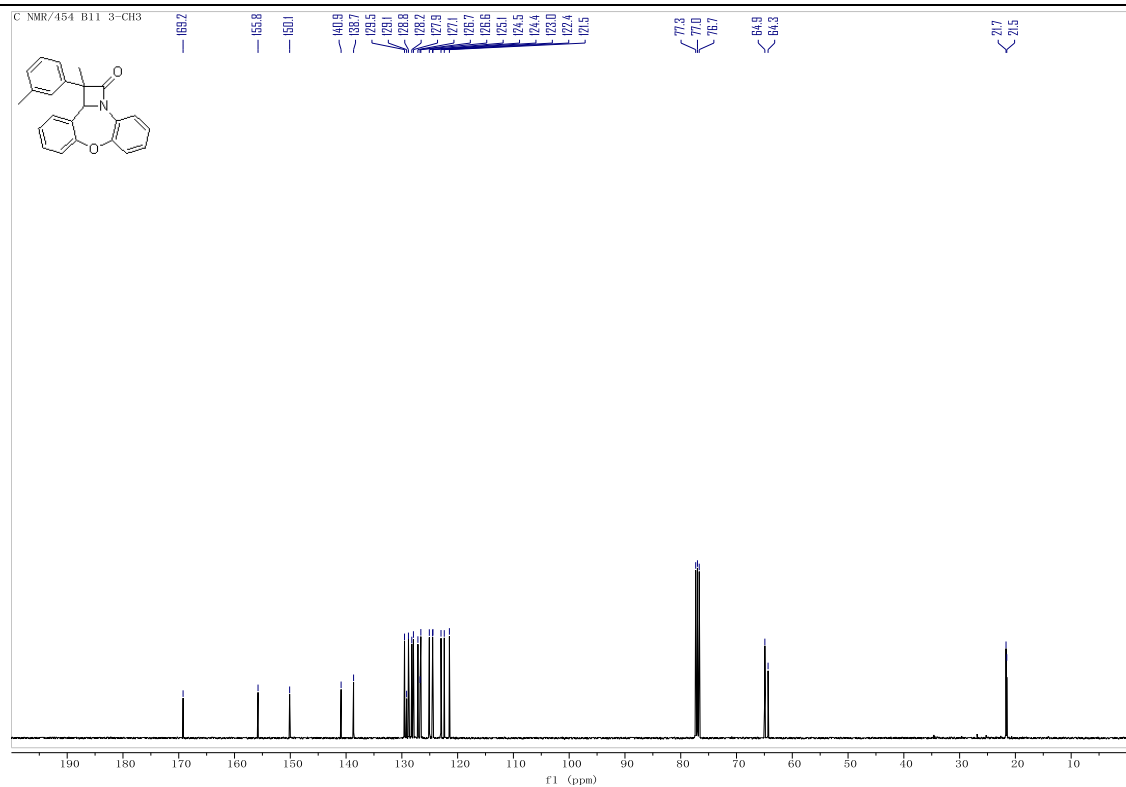

# <sup>1</sup>H NMR Spectrum of 3al

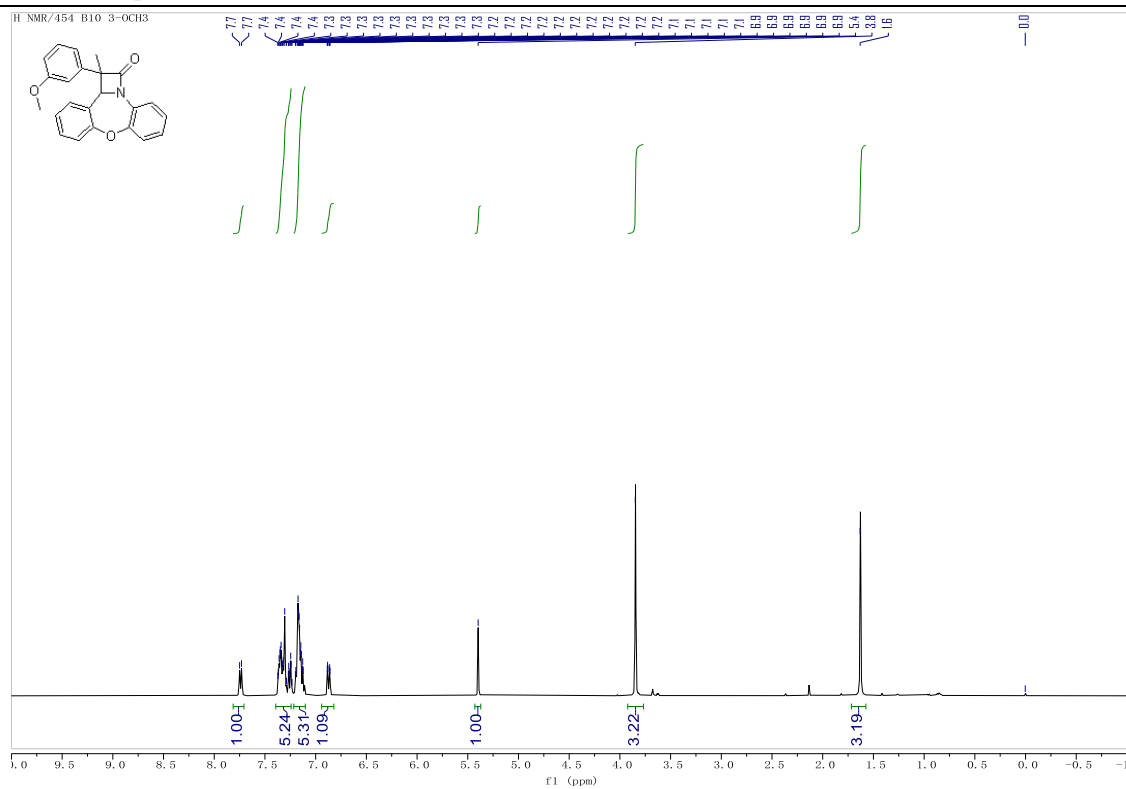

# <sup>13</sup>C NMR Spectrum of 3al

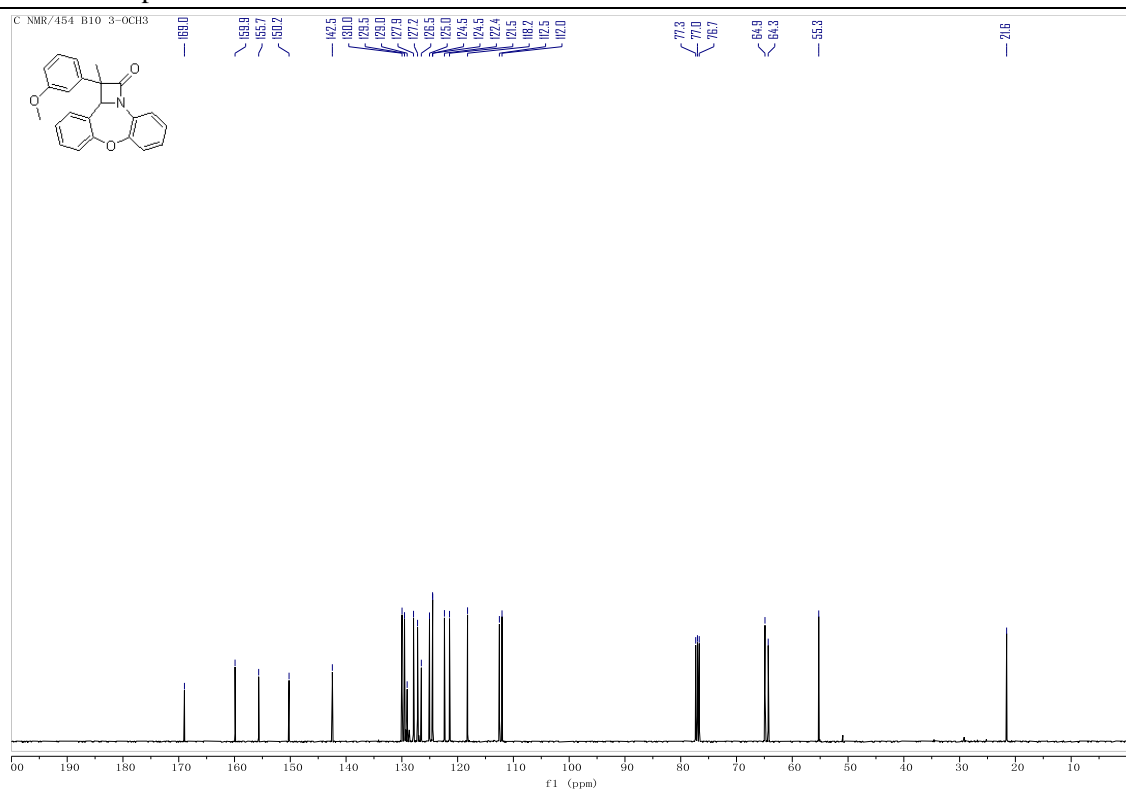

# <sup>1</sup>H NMR Spectrum of **3am**

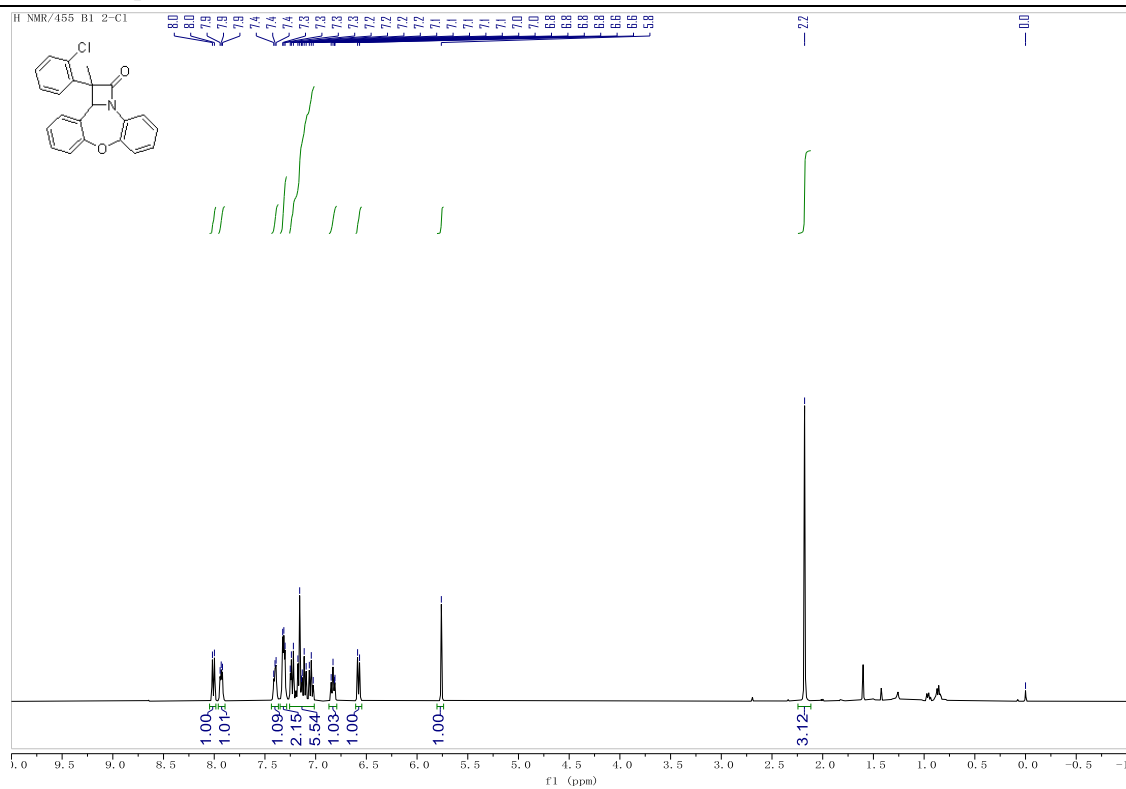

# <sup>13</sup>C NMR Spectrum of **3am**

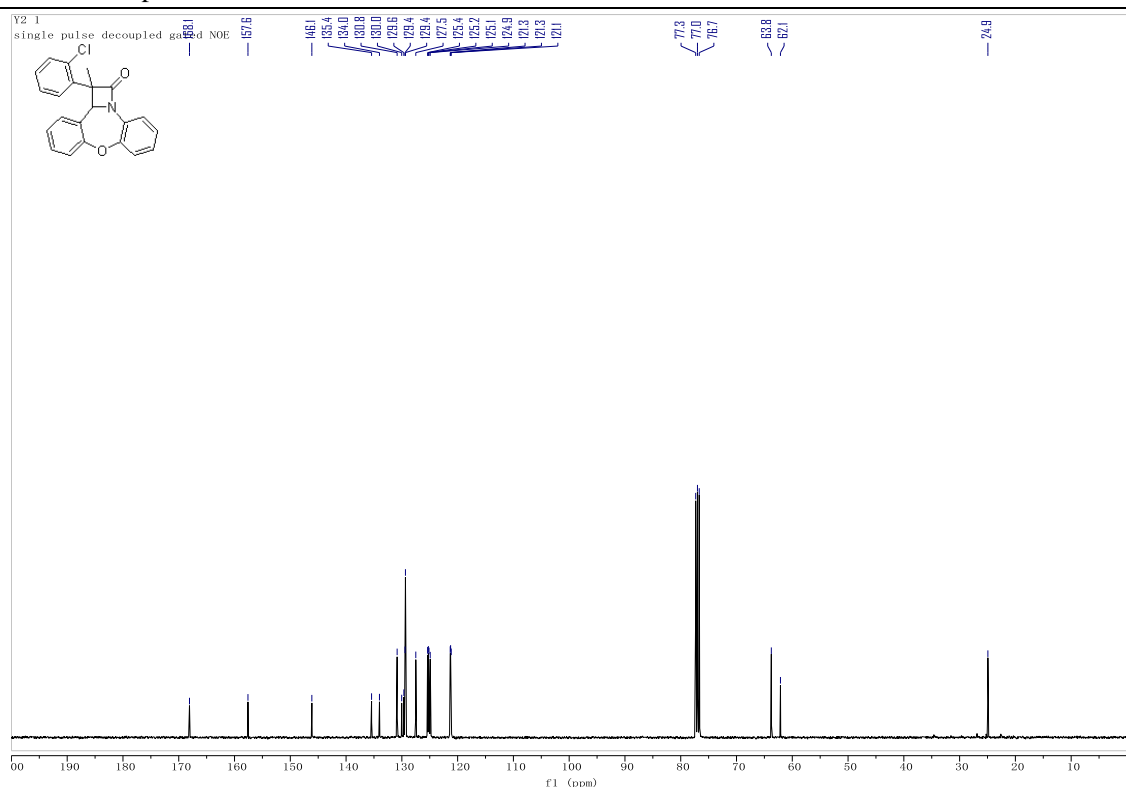

# <sup>1</sup>H NMR Spectrum of 3an

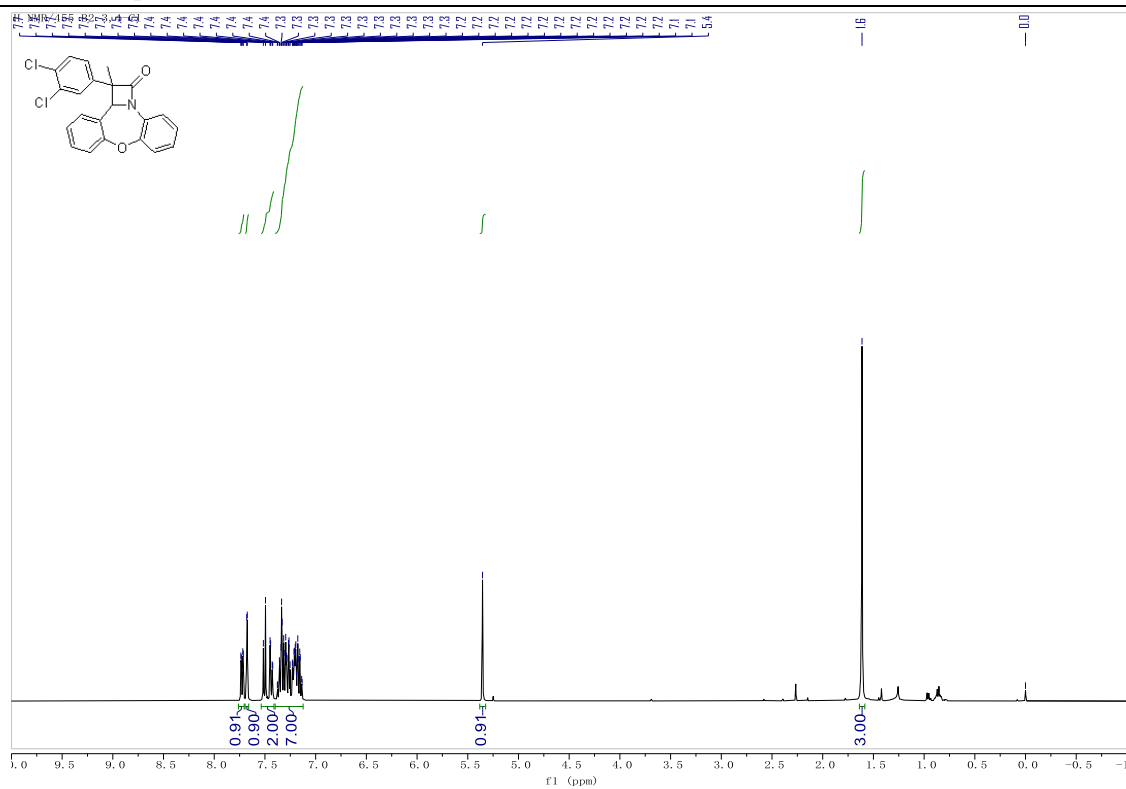

# <sup>13</sup>C NMR Spectrum of 3an

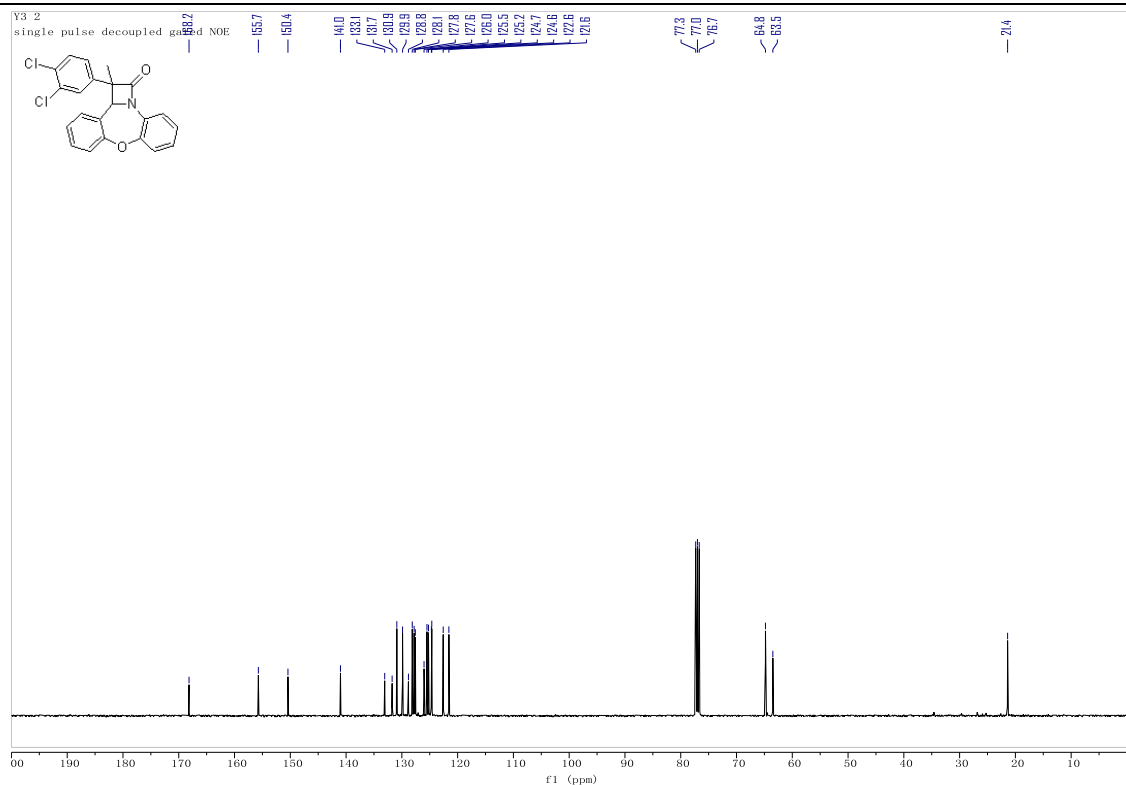

### <sup>1</sup>H NMR Spectrum of 3ao

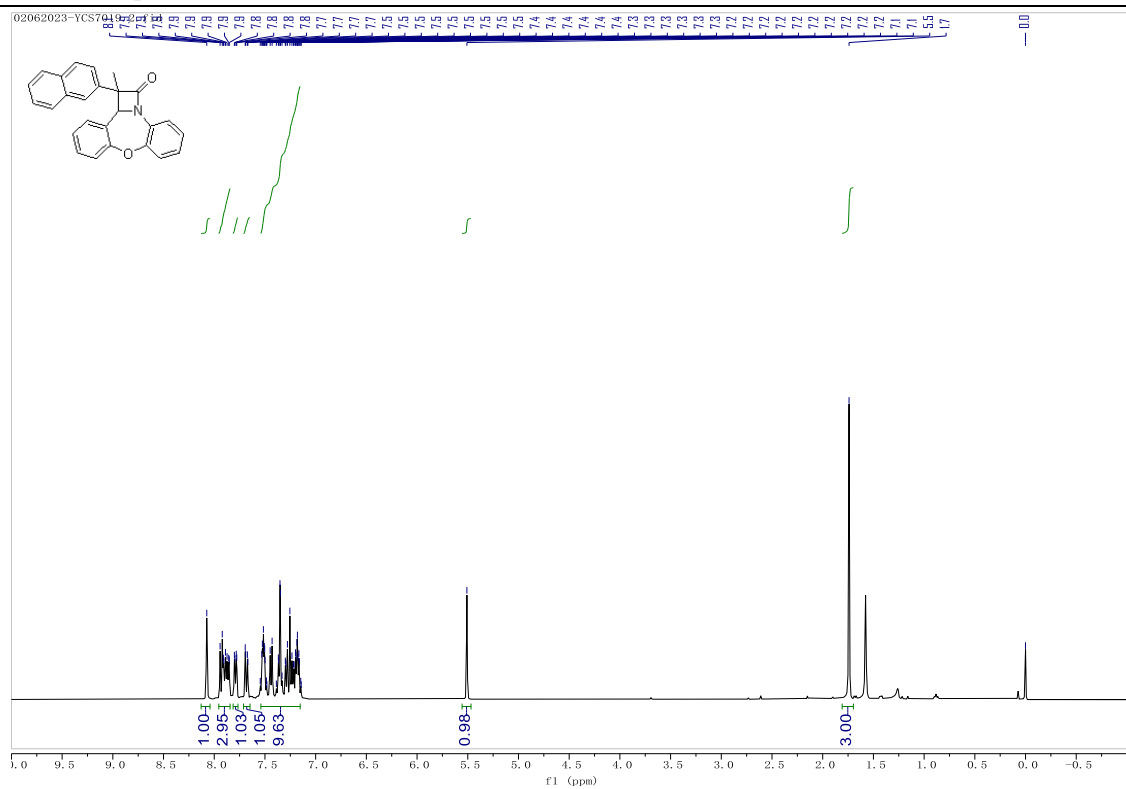

### <sup>13</sup>C NMR Spectrum of 3ao

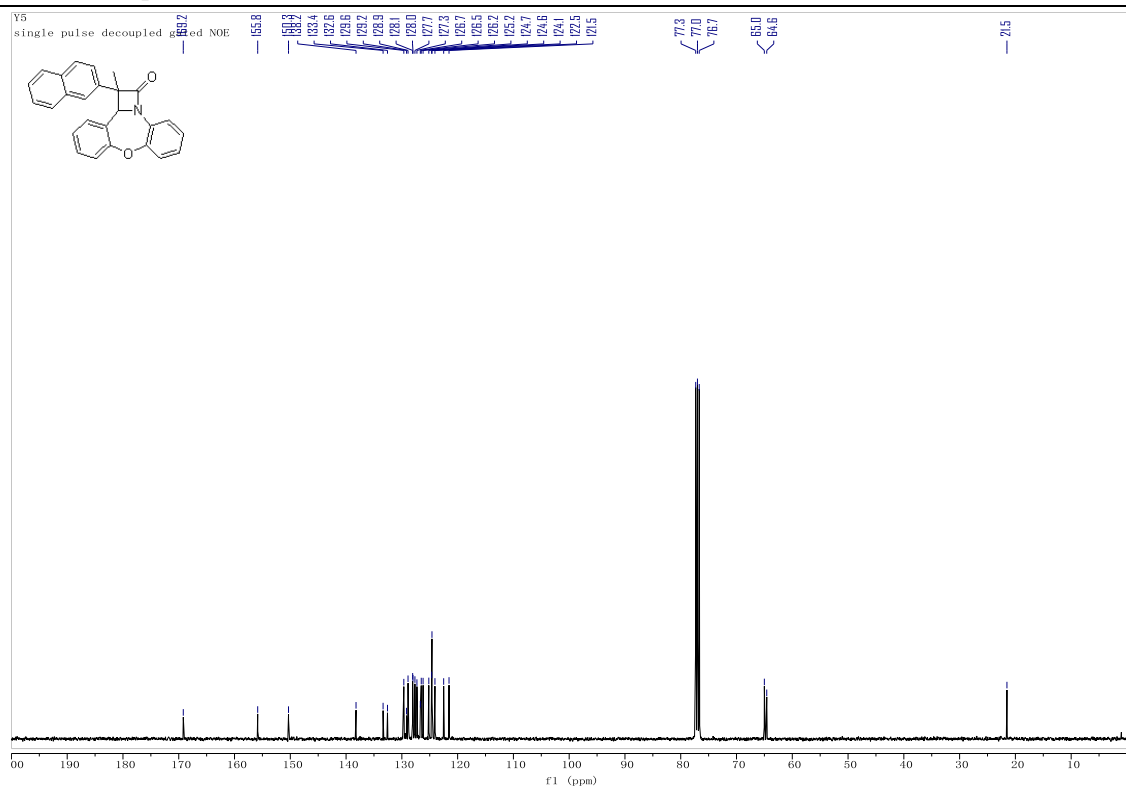

# <sup>1</sup>H NMR Spectrum of 3ap

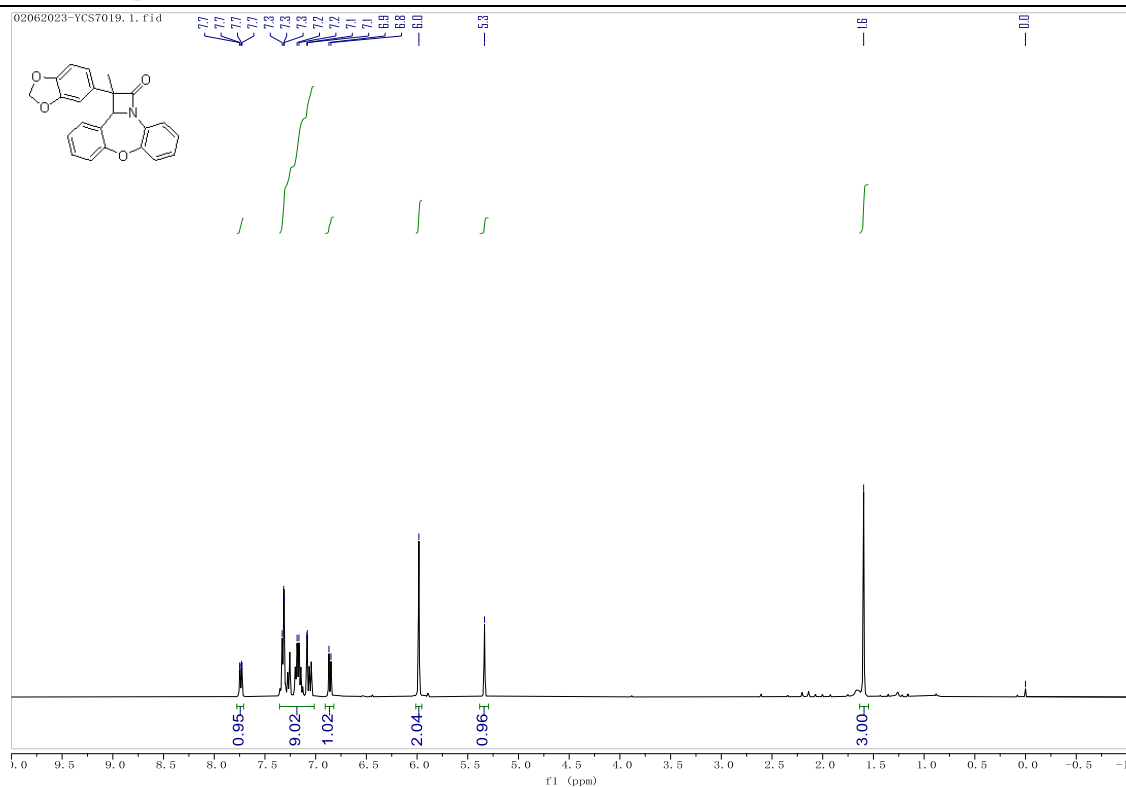

# <sup>13</sup>C NMR Spectrum of 3ap

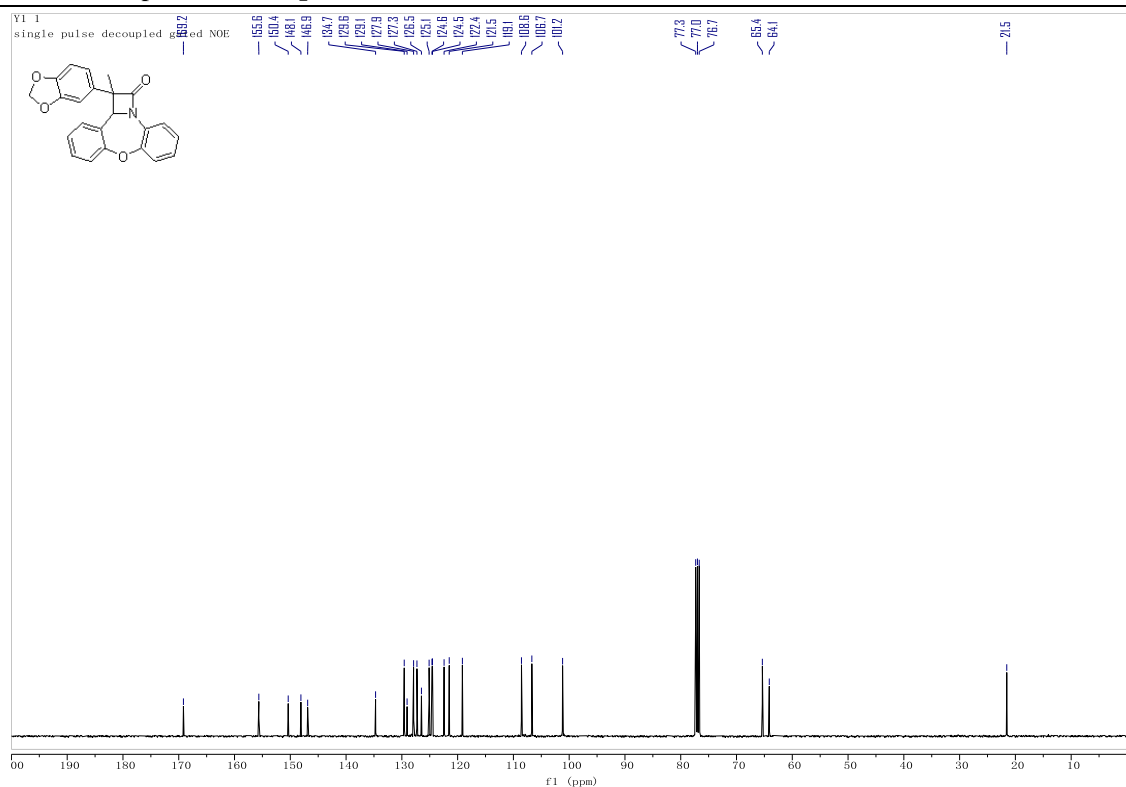



### <sup>1</sup>H NMR Spectrum of 3aq

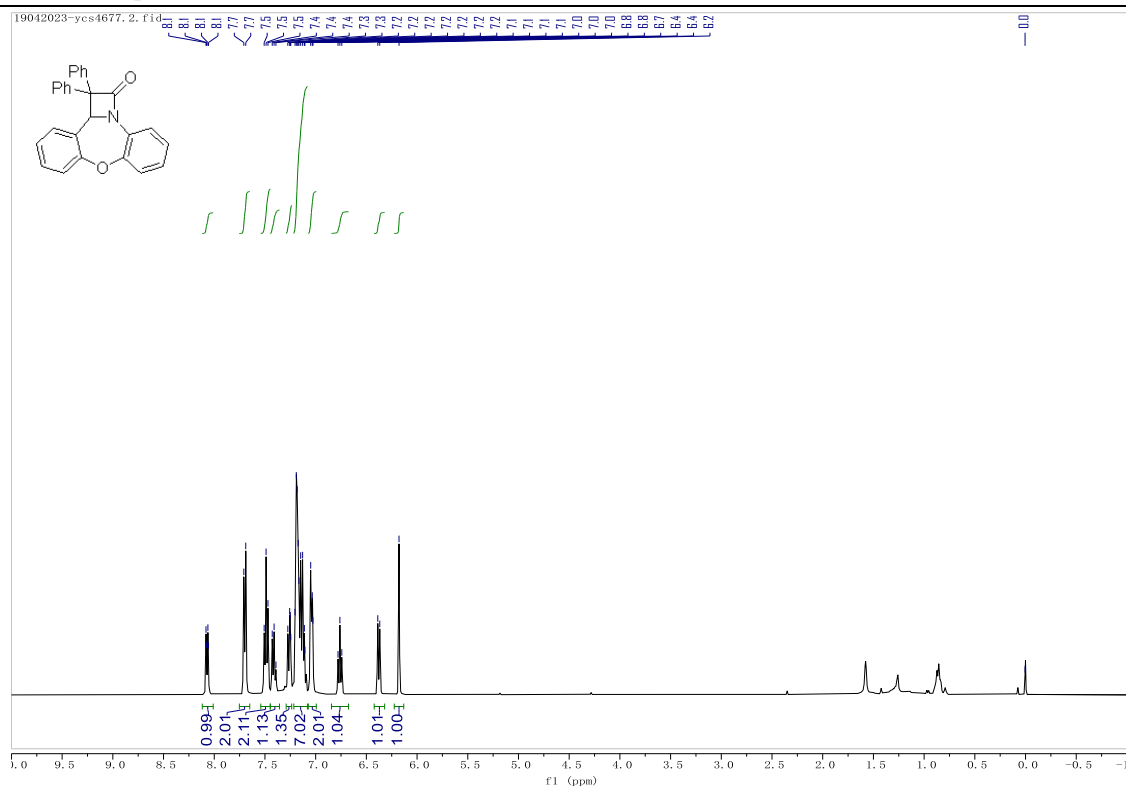

### <sup>13</sup>C NMR Spectrum of 3aq

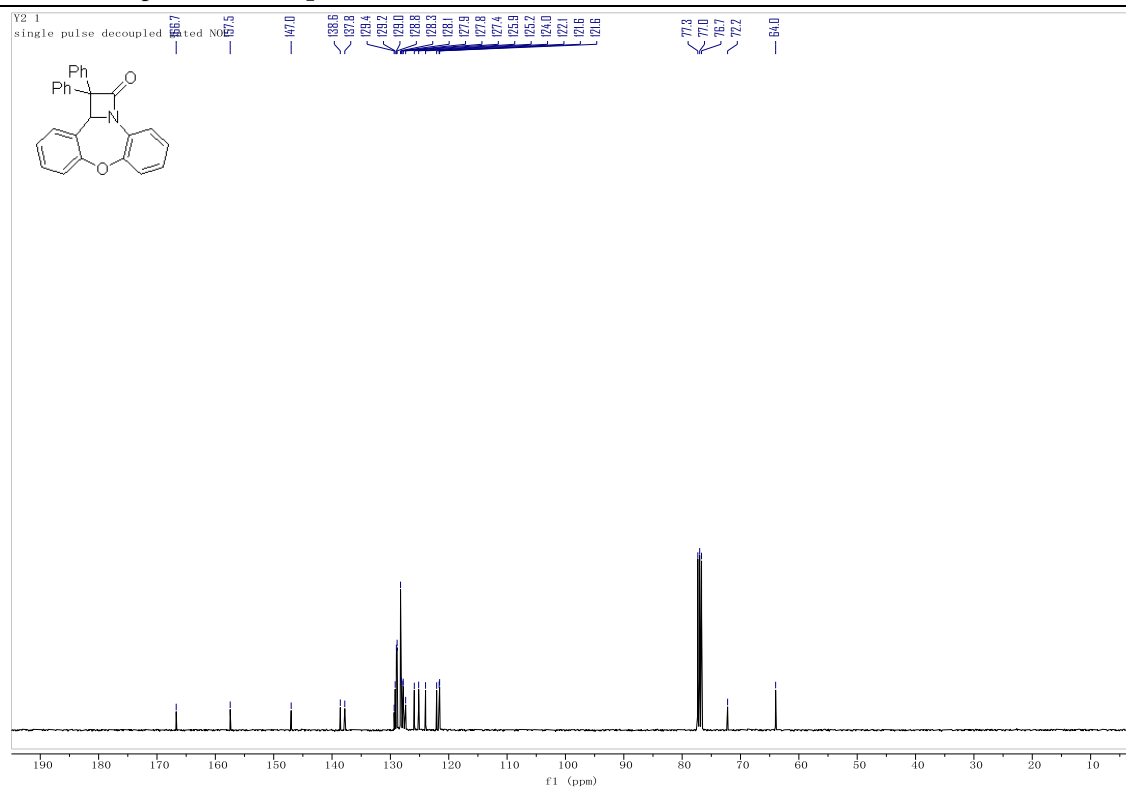

### <sup>1</sup>H NMR Spectrum of 3ar

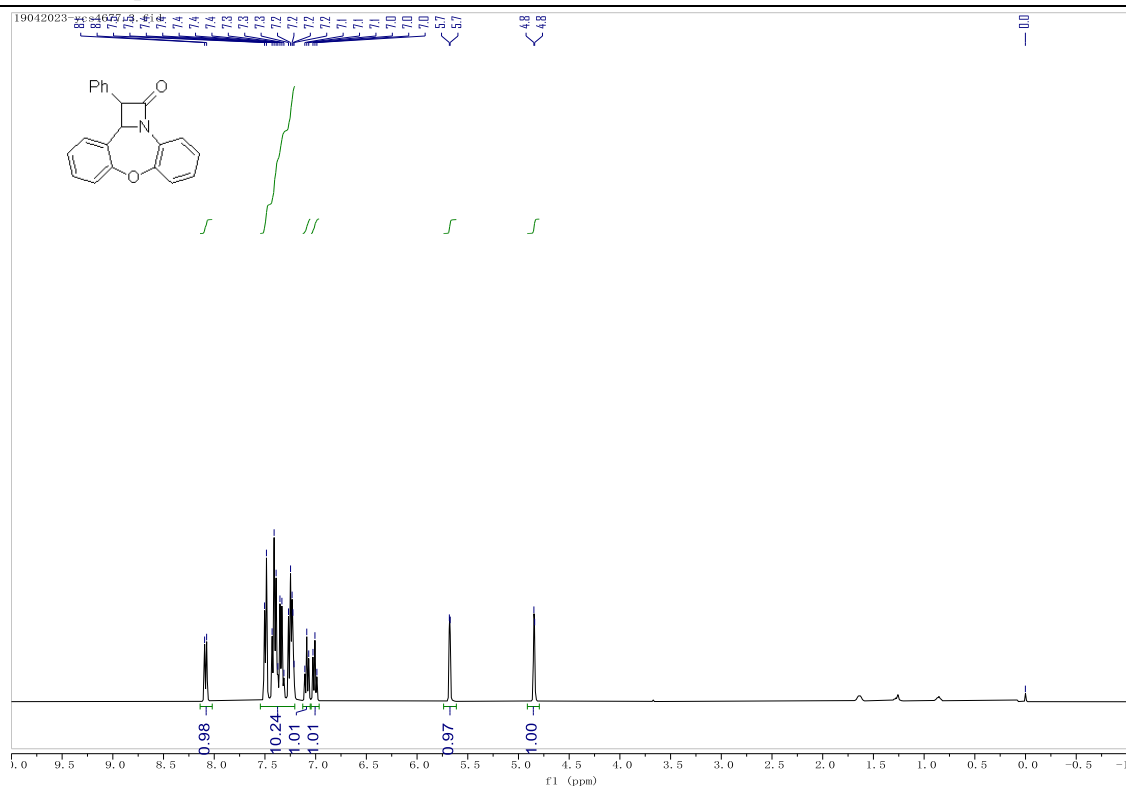

### <sup>13</sup>C NMR & <sup>19</sup>F NMR Spectrum of 3ar

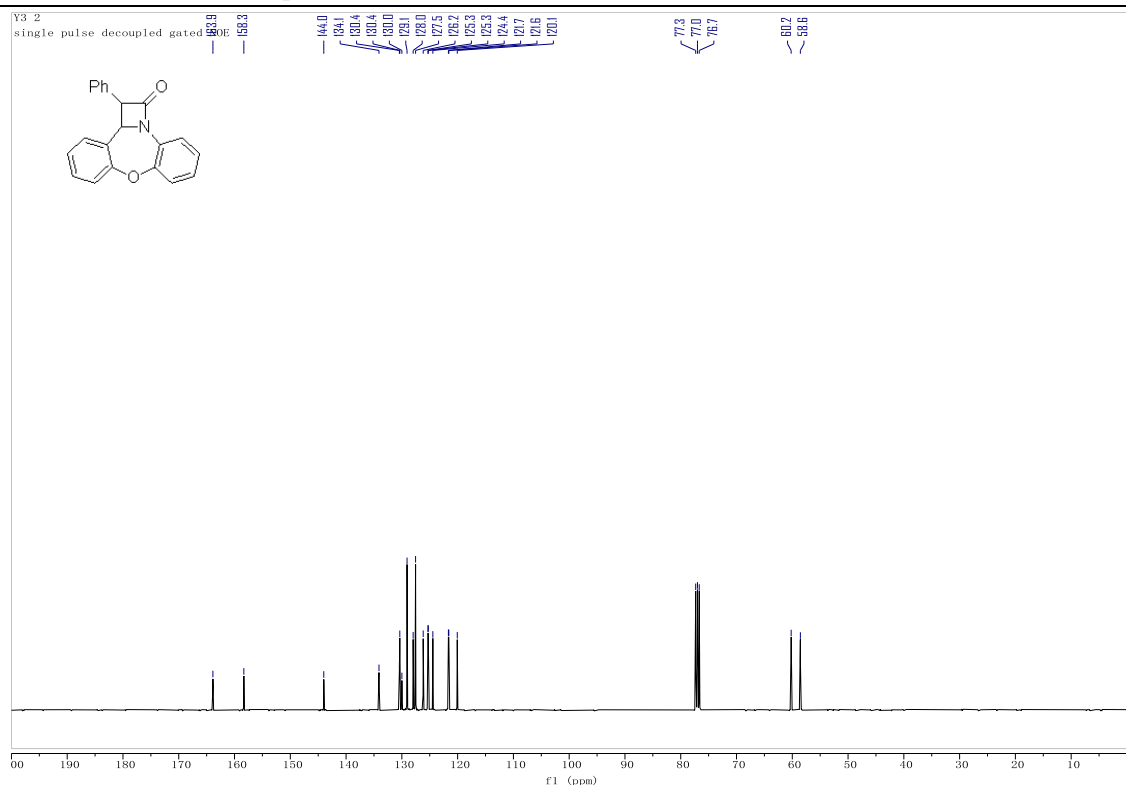

### <sup>1</sup>H NMR Spectrum of 3as

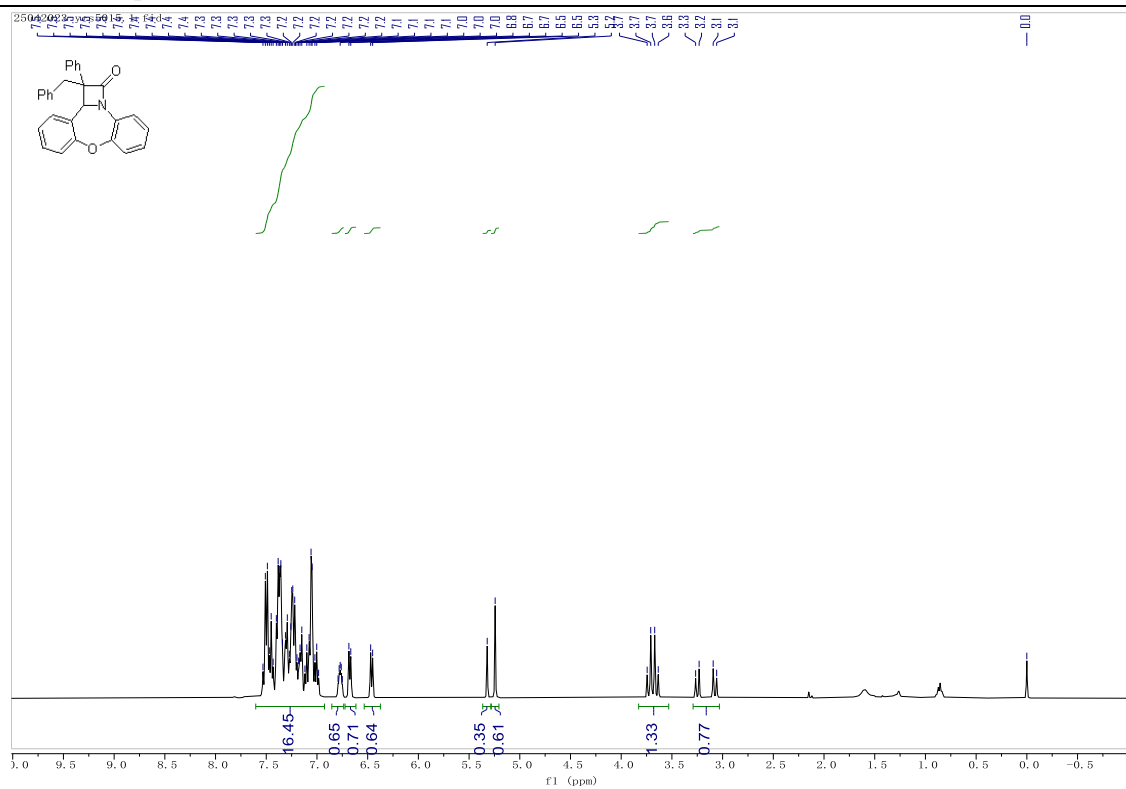

### <sup>13</sup>C NMR Spectrum of 3as

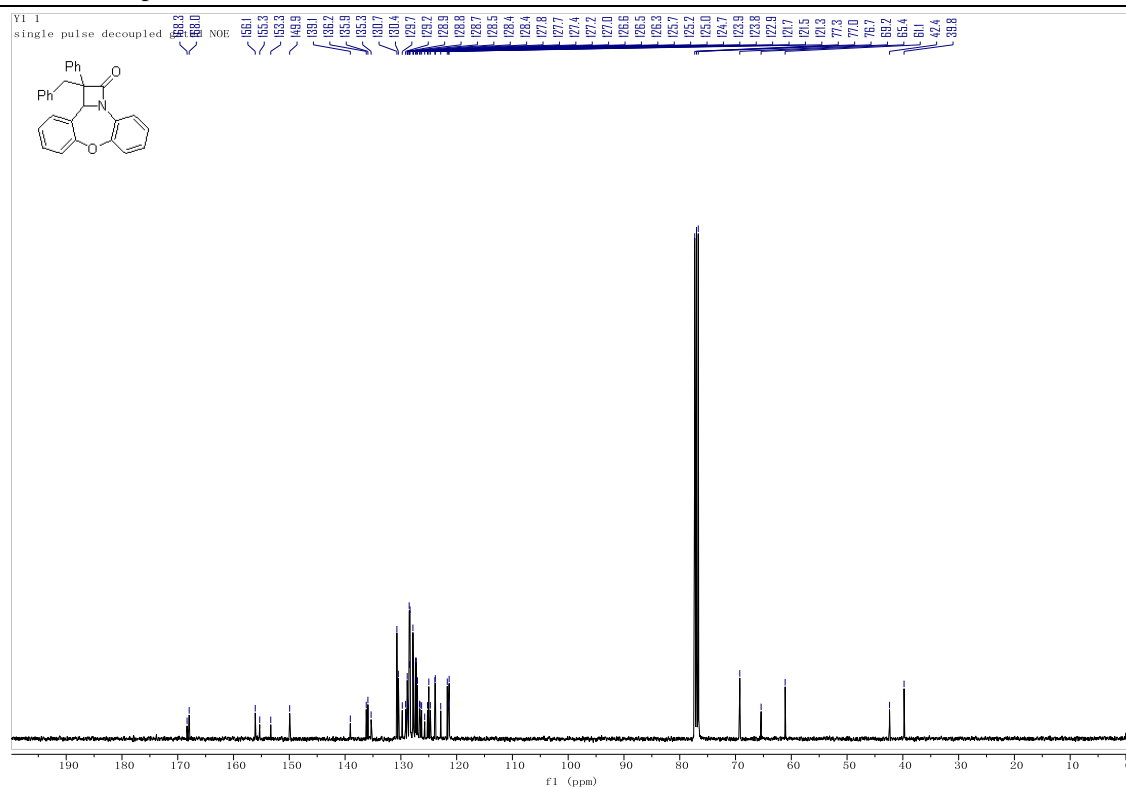



### <sup>1</sup>H NMR Spectrum of 3bq

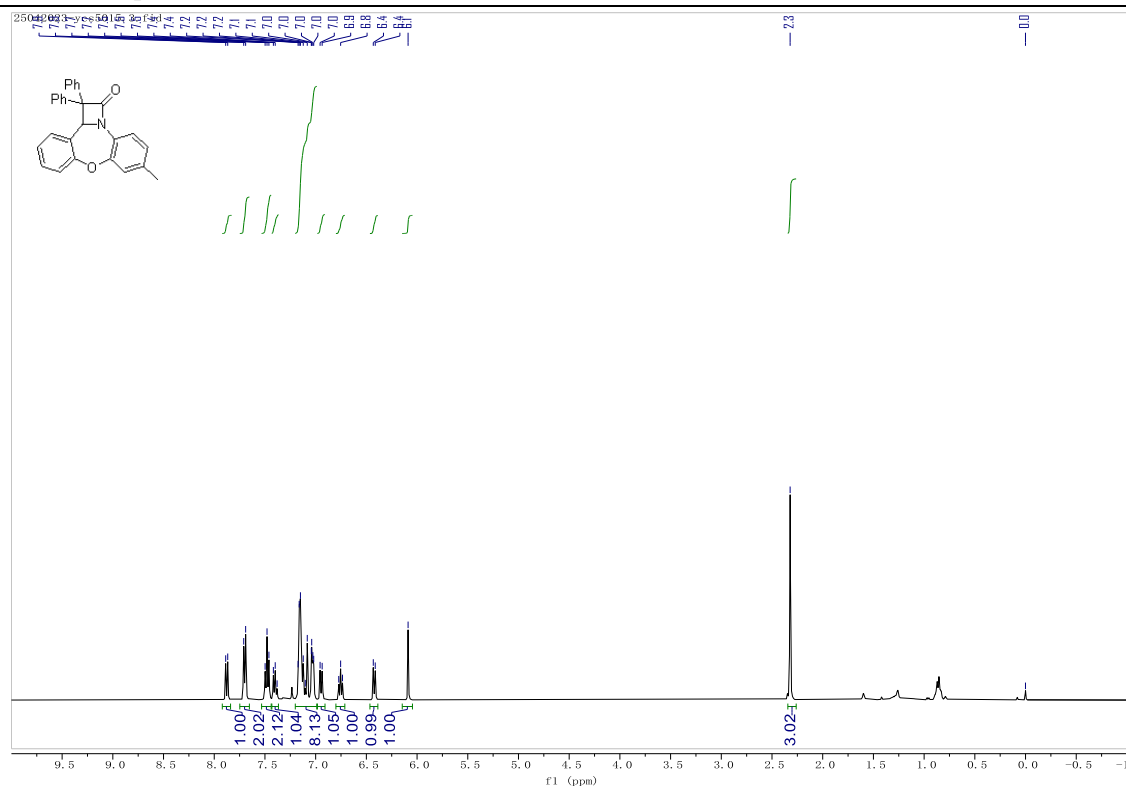

### <sup>13</sup>C NMR Spectrum of 3bq

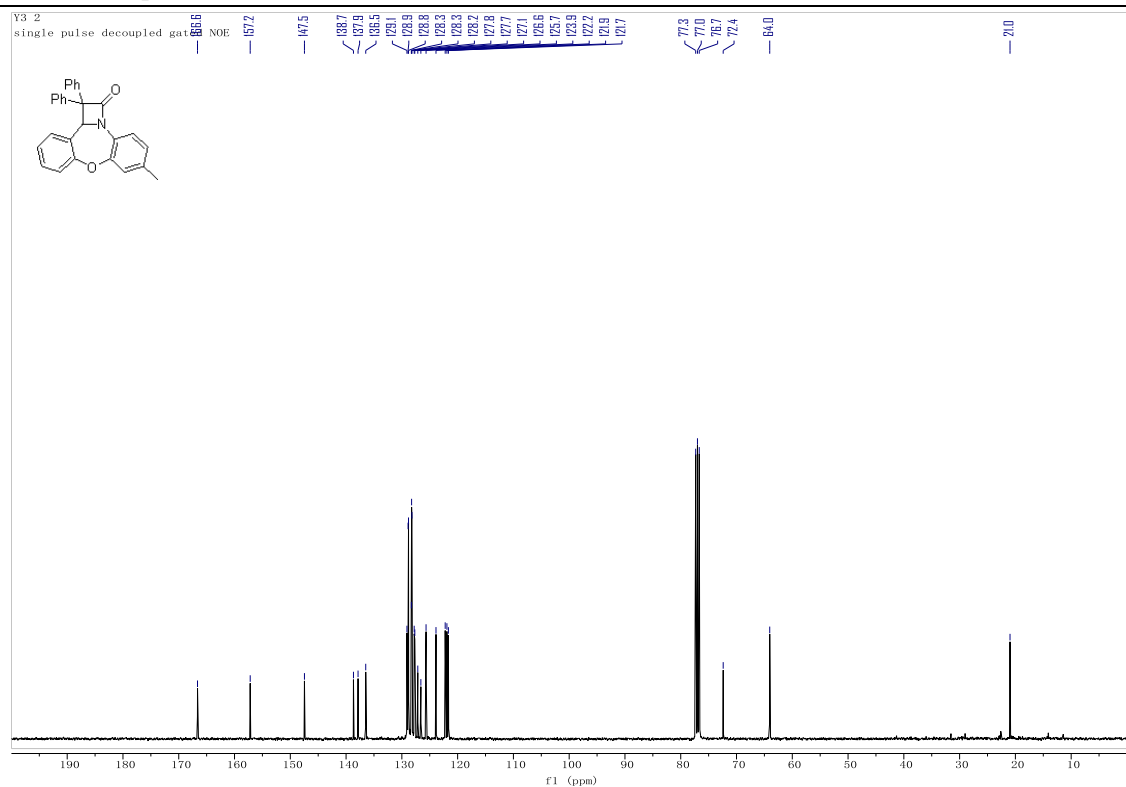

# <sup>1</sup>H NMR Spectrum of 3cq

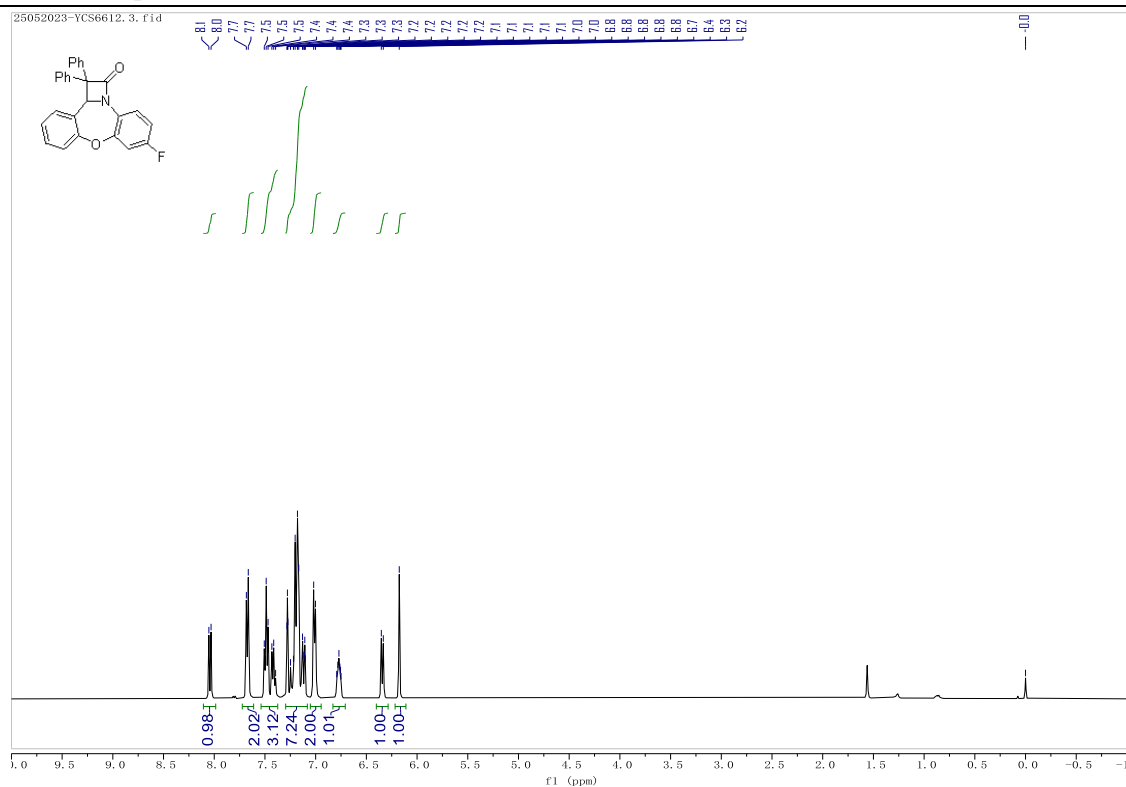

# <sup>13</sup>C NMR Spectrum of 3cq

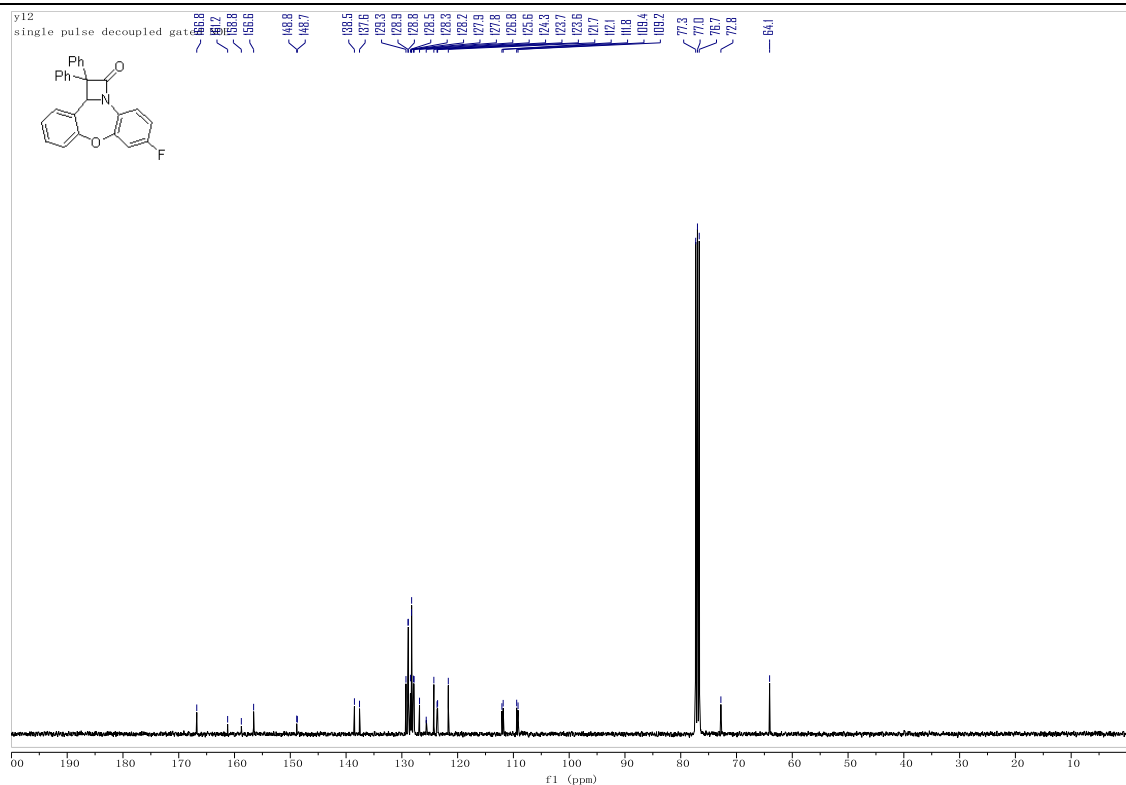

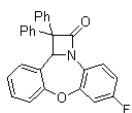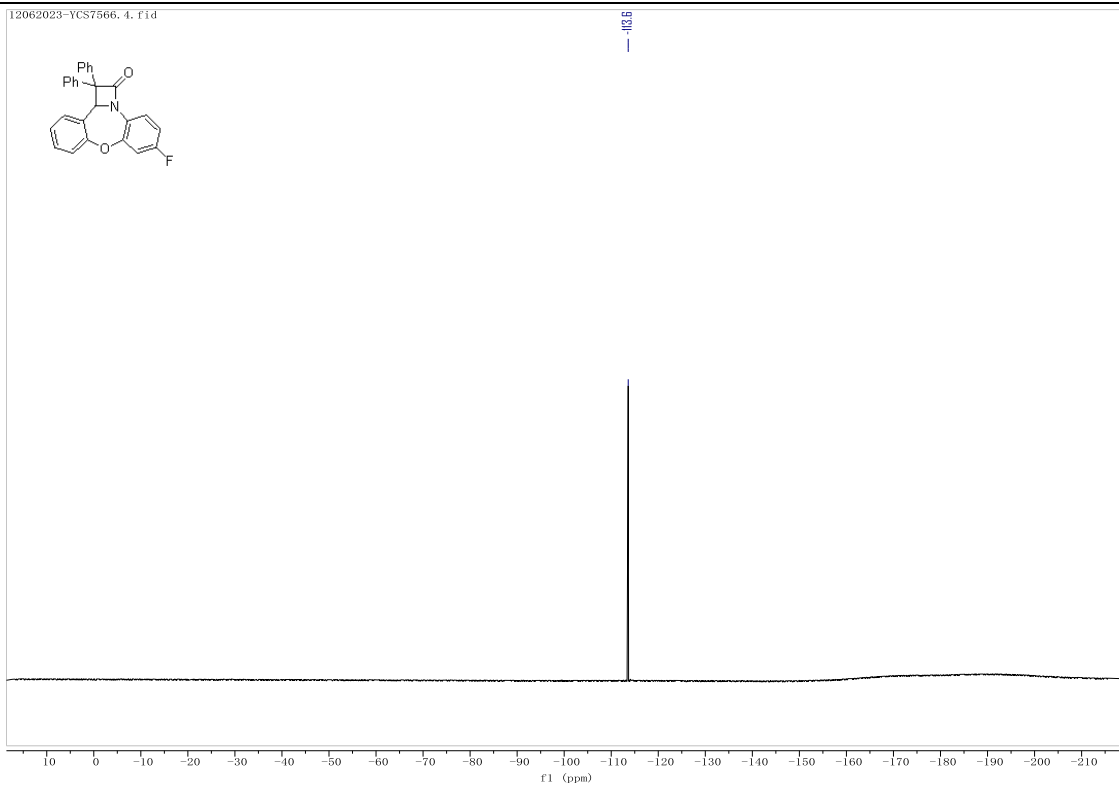

### <sup>1</sup>H NMR Spectrum of 3dq

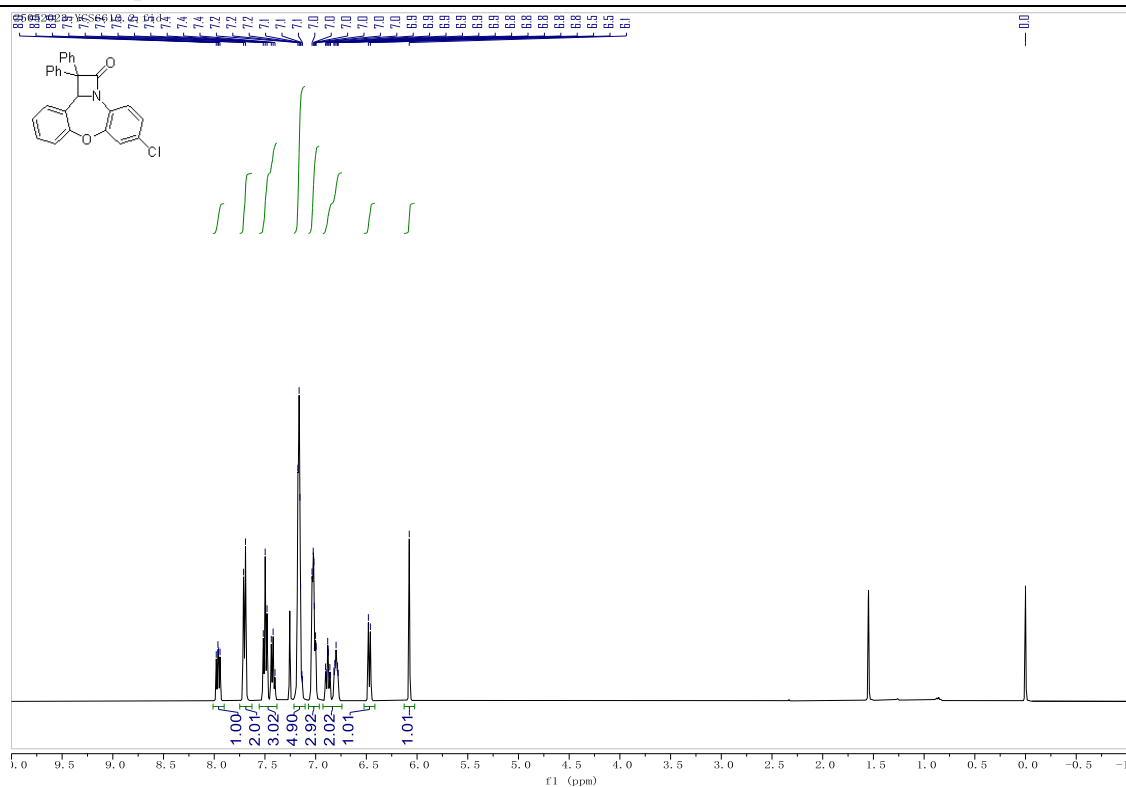

### <sup>13</sup>C NMR Spectrum of 3dq

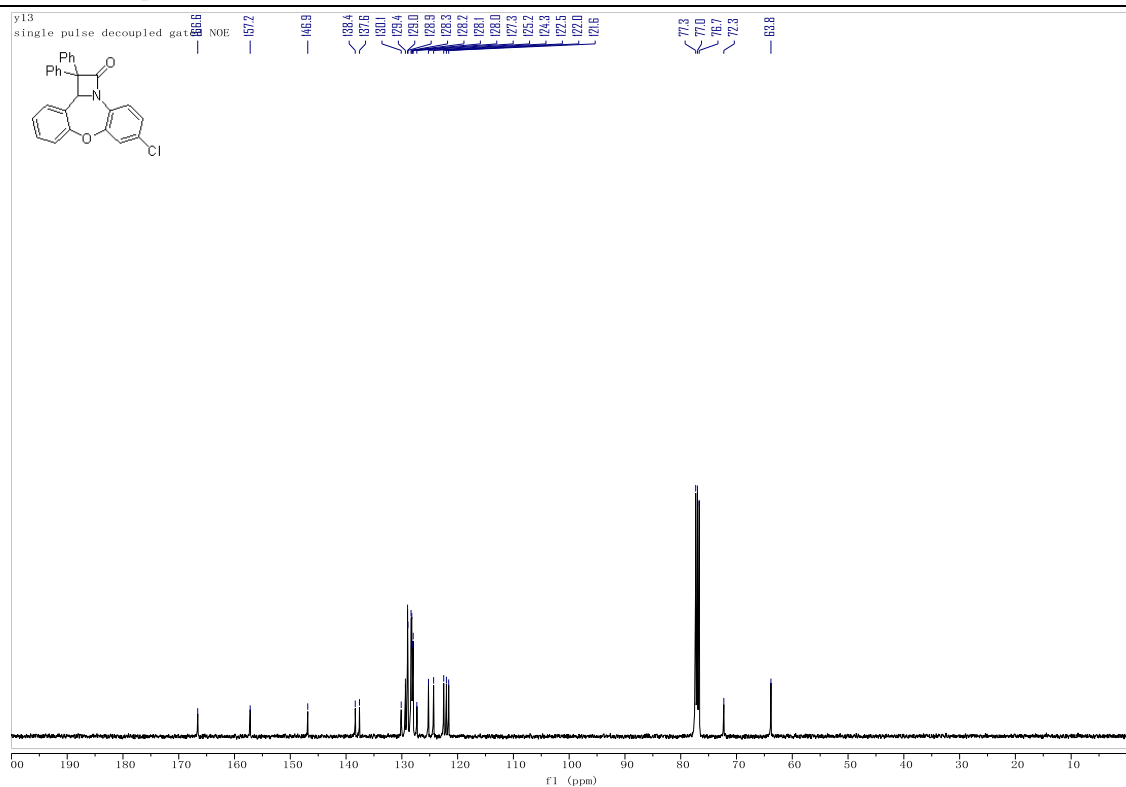



### <sup>1</sup>H NMR Spectrum of **3eq**

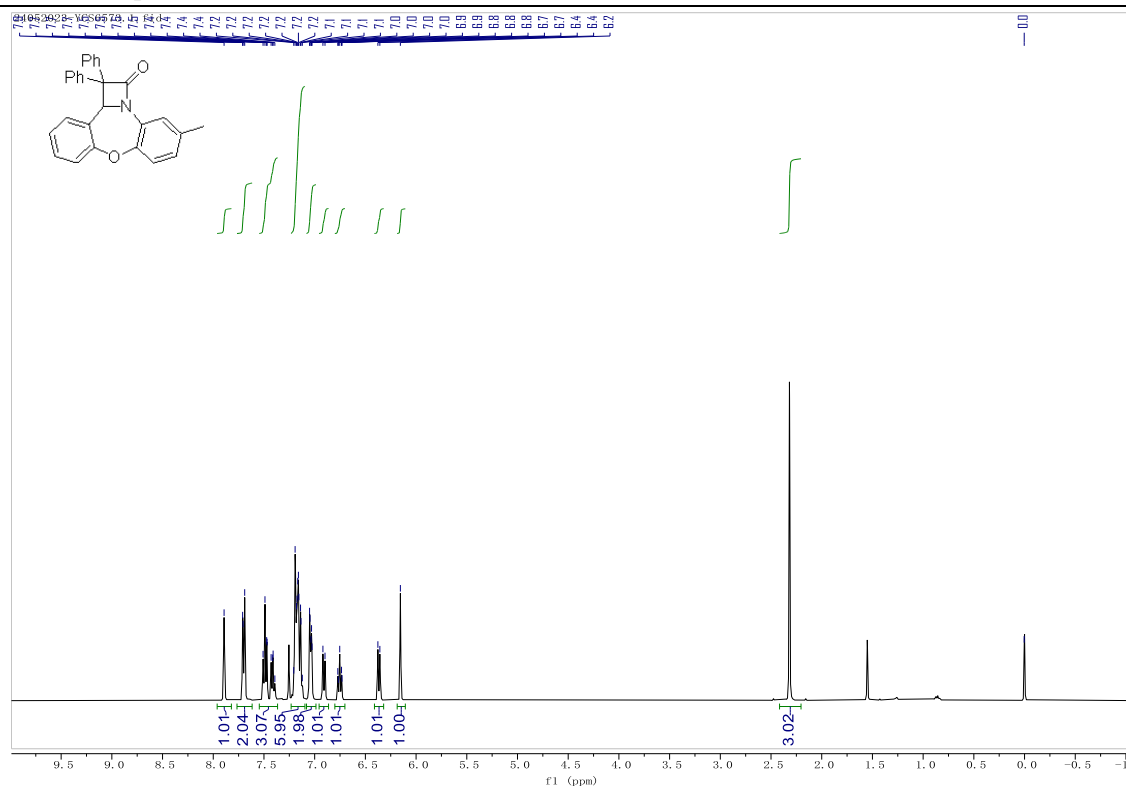

### <sup>13</sup>C NMR Spectrum of **3eq**

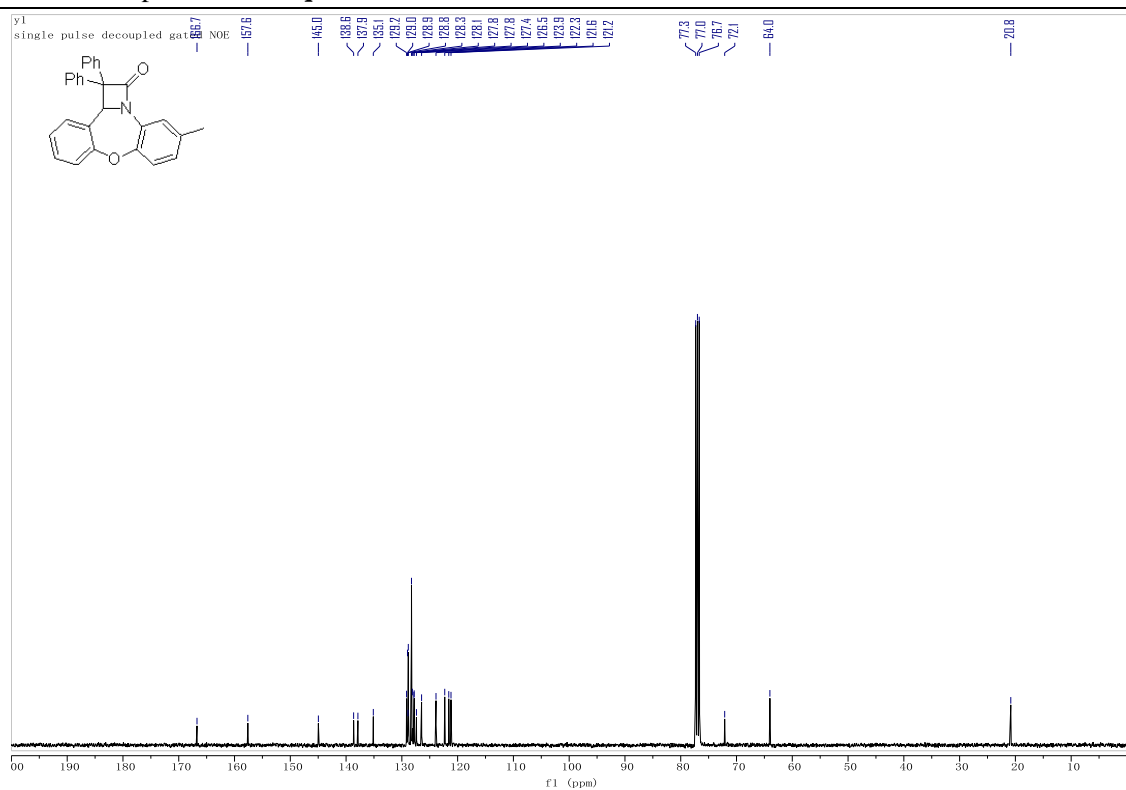

### <sup>1</sup>H NMR Spectrum of 3fq

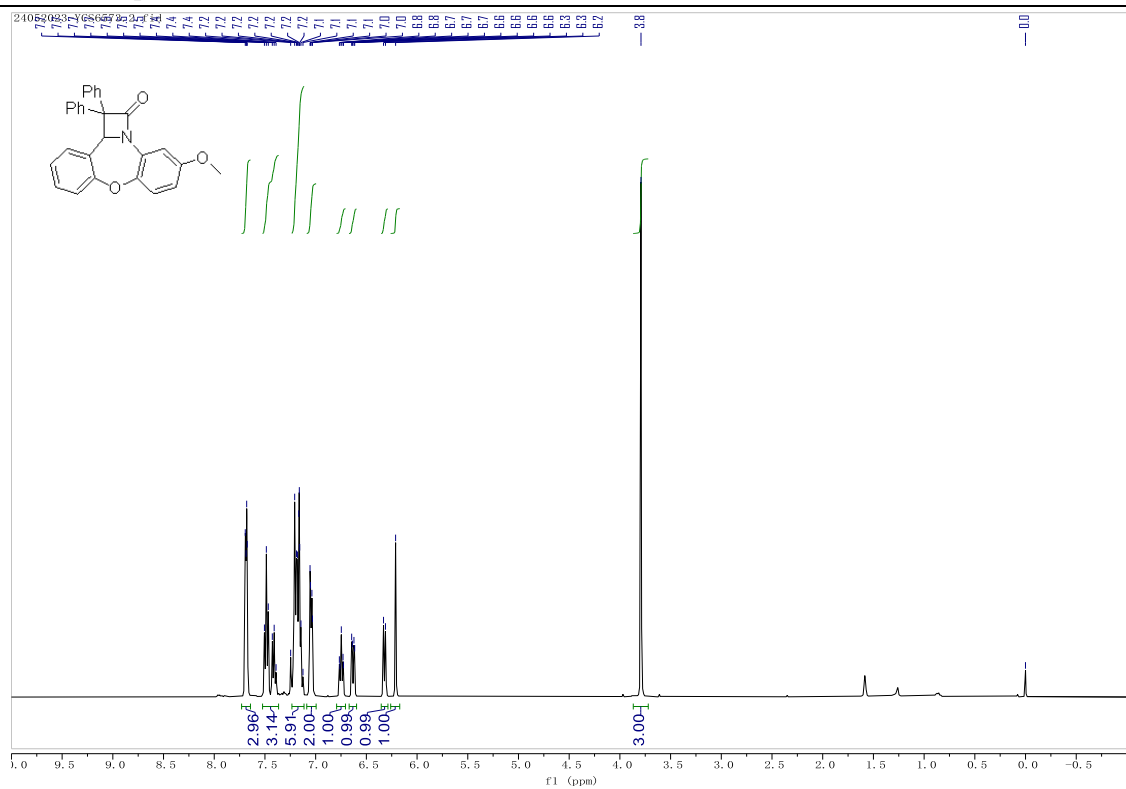

### <sup>13</sup>C NMR Spectrum of 3fq

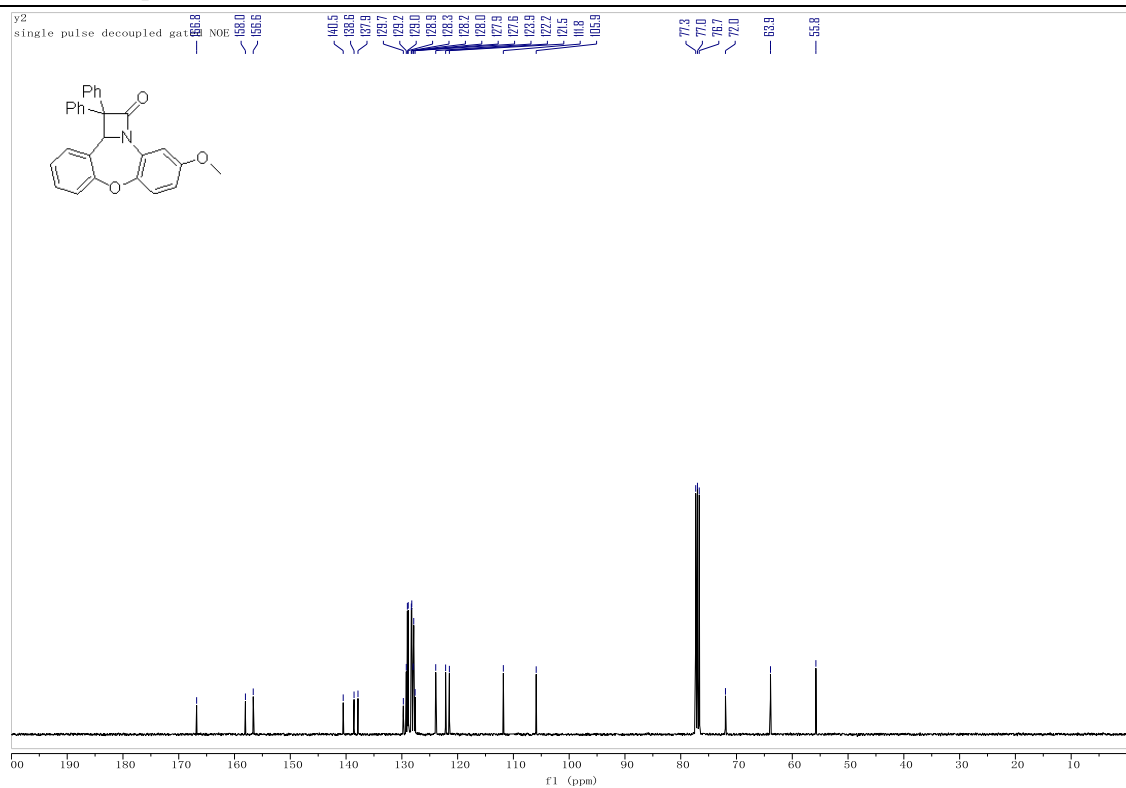

### <sup>1</sup>H NMR Spectrum of 3gq

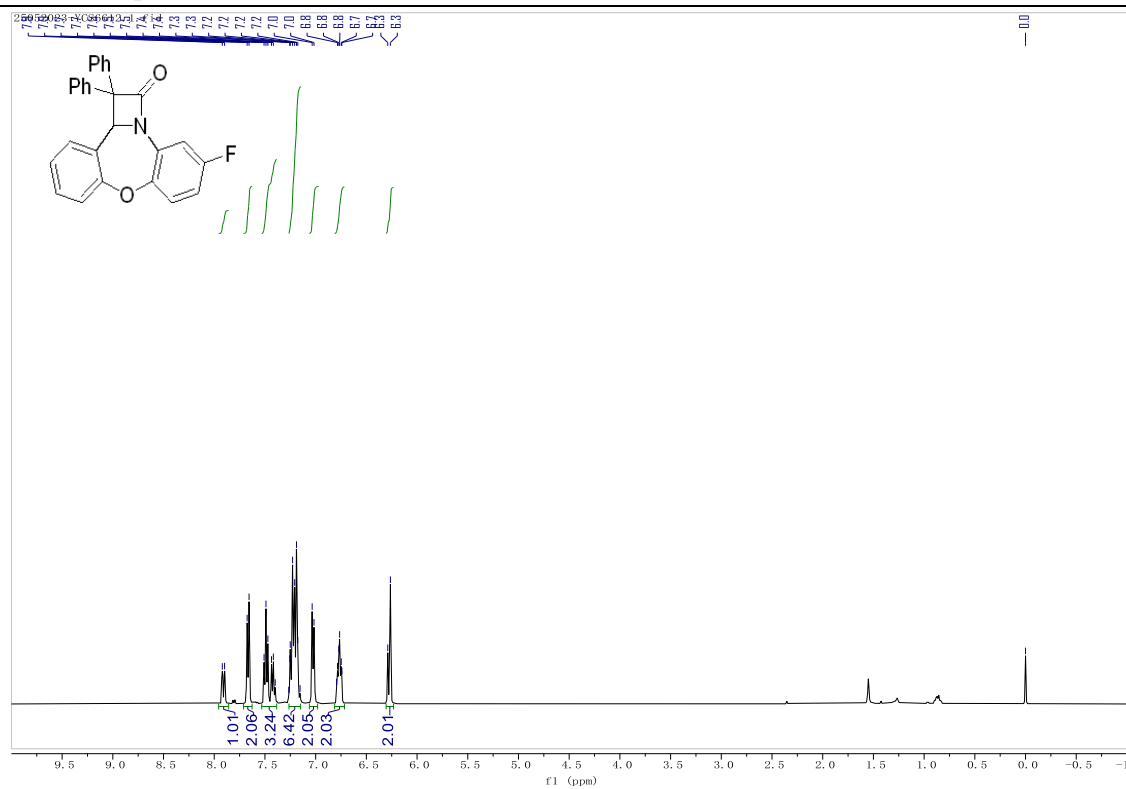

### <sup>13</sup>C NMR Spectrum of 3gq

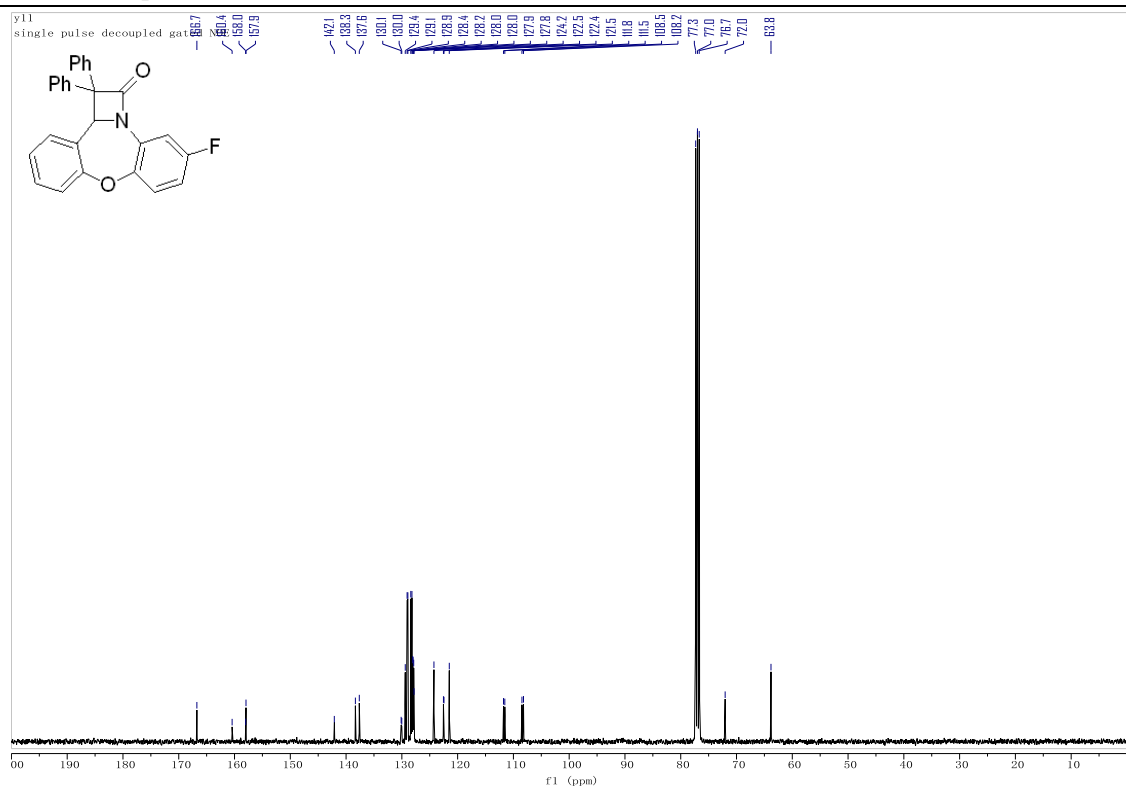

12062023-YCS7566\_5.f1d

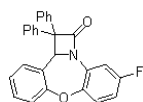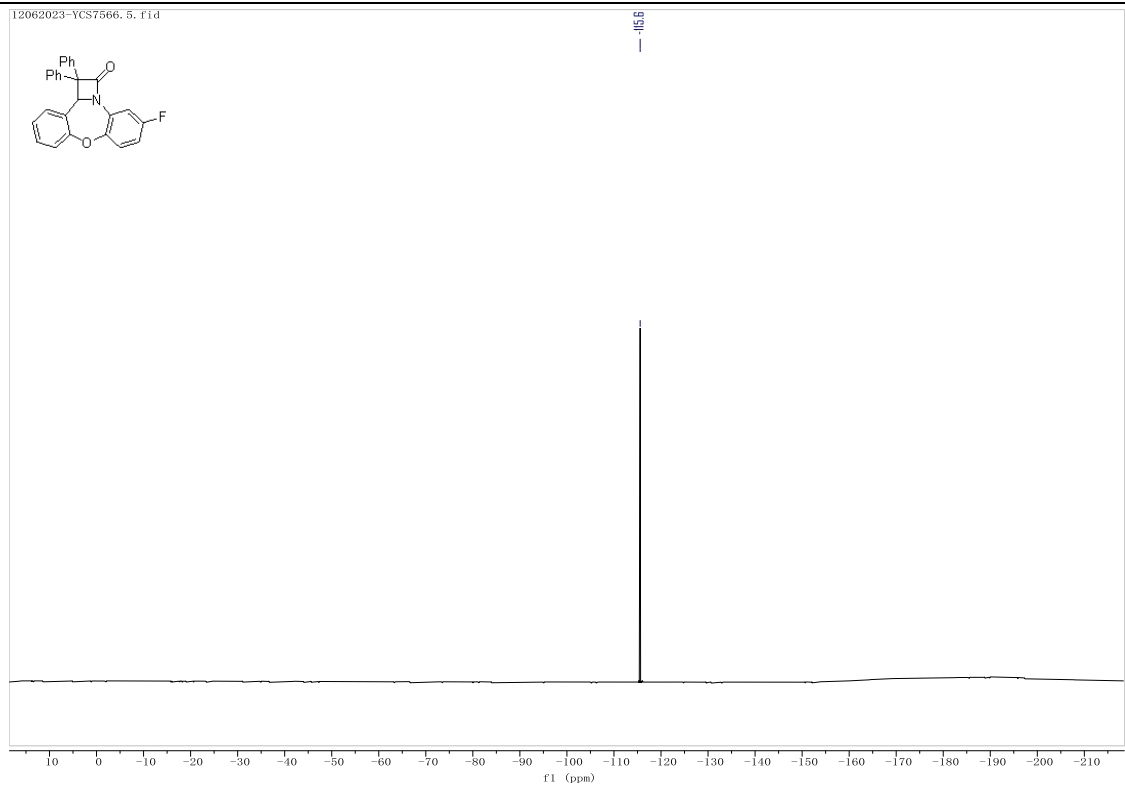

### <sup>1</sup>H NMR Spectrum of 3hq

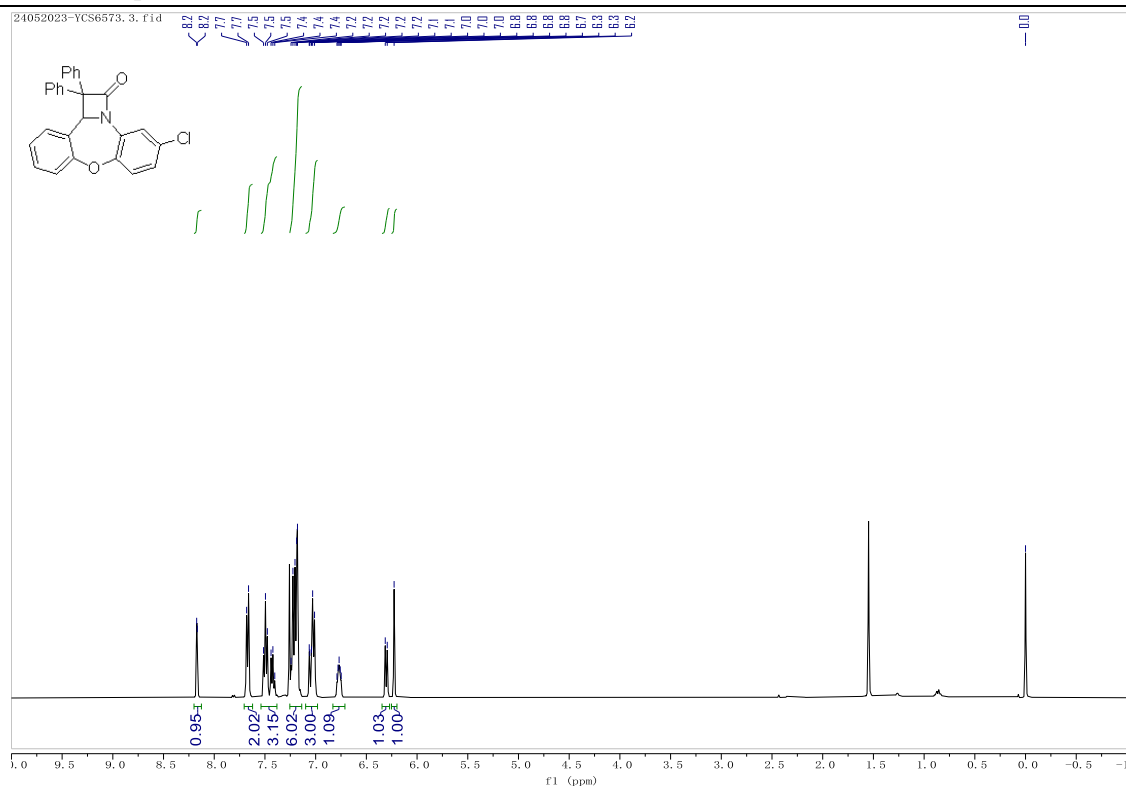

### <sup>13</sup>C NMR Spectrum of 3hq

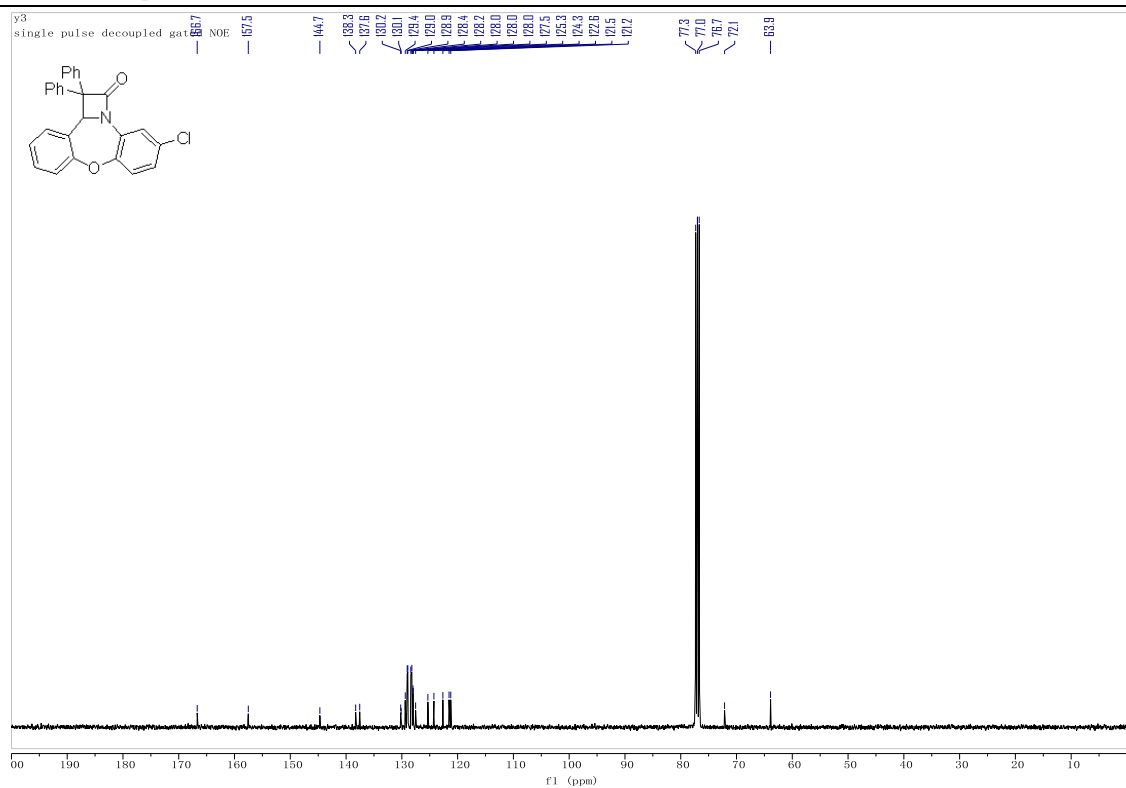

# <sup>1</sup>H NMR Spectrum of **3iq**

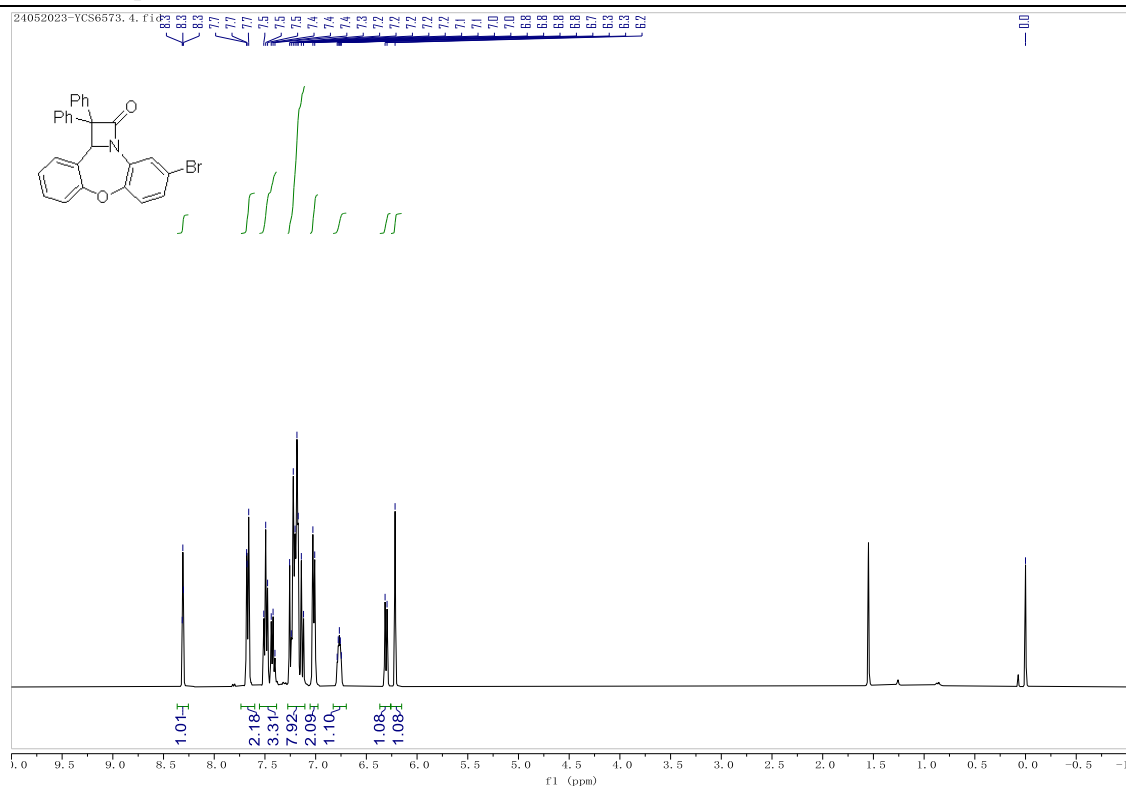

# <sup>13</sup>C NMR Spectrum of **3iq**

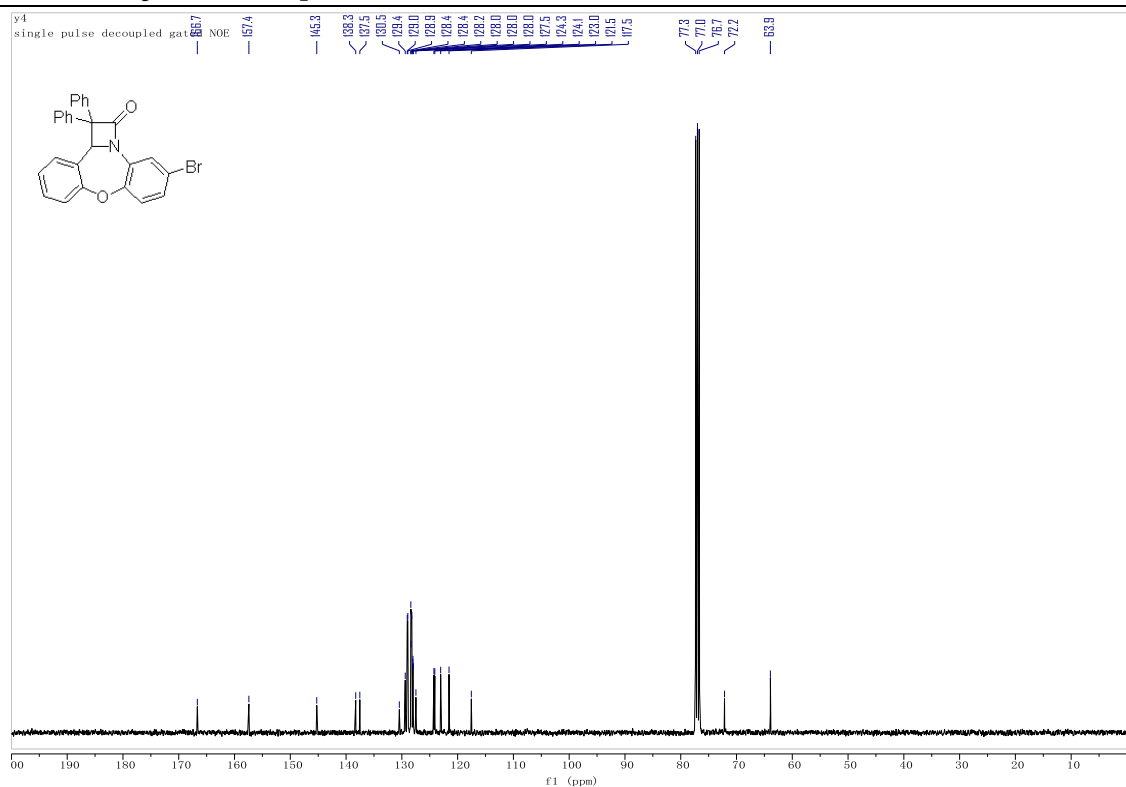

### <sup>1</sup>H NMR Spectrum of 3jq

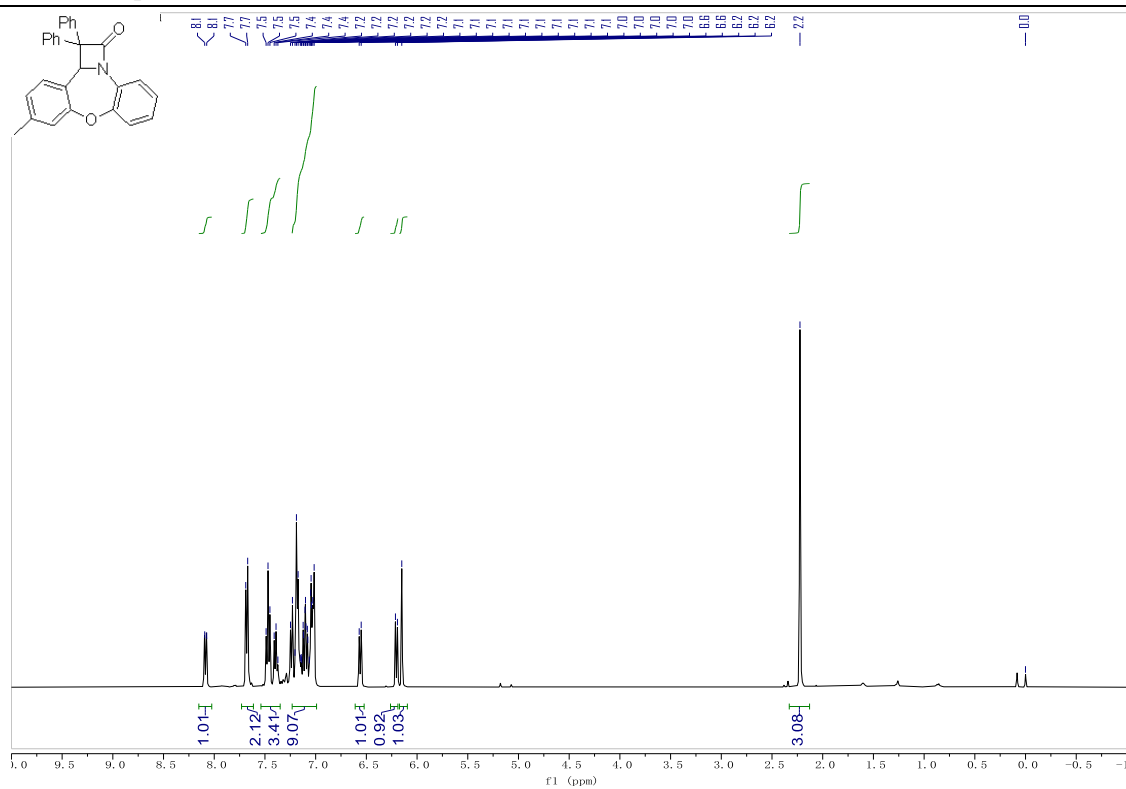

### <sup>13</sup>C NMR Spectrum of 3jq

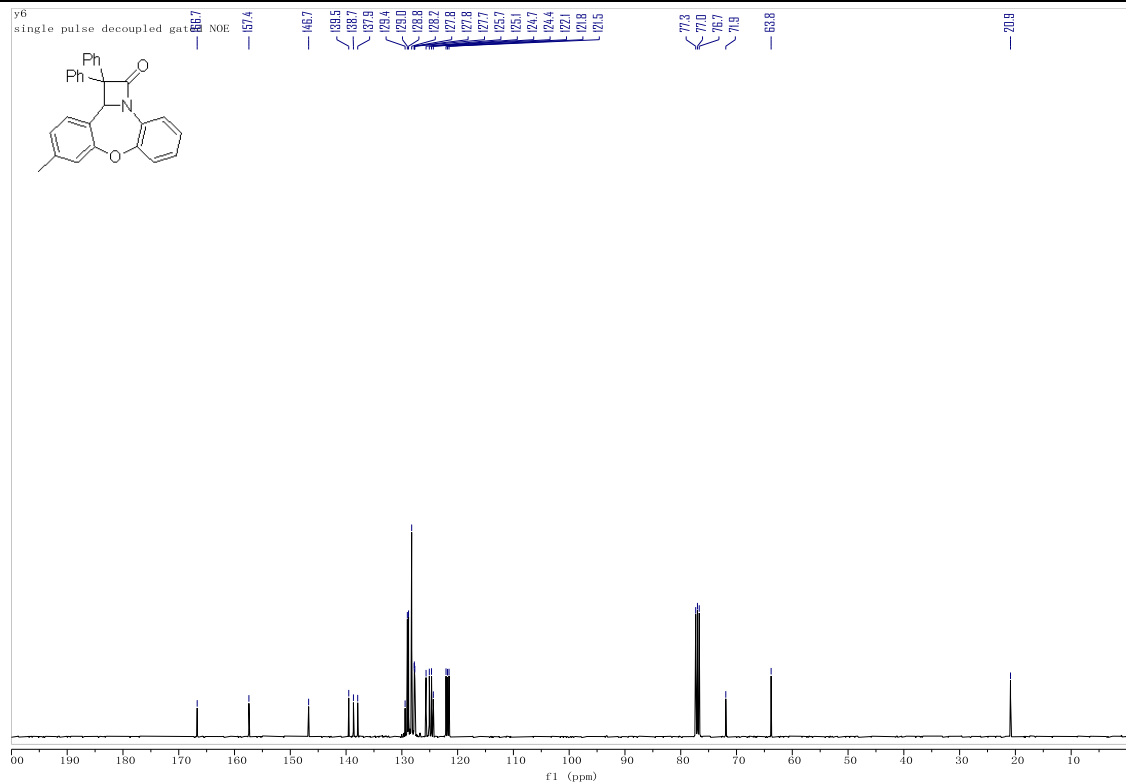

### <sup>1</sup>H NMR Spectrum of **3kq**

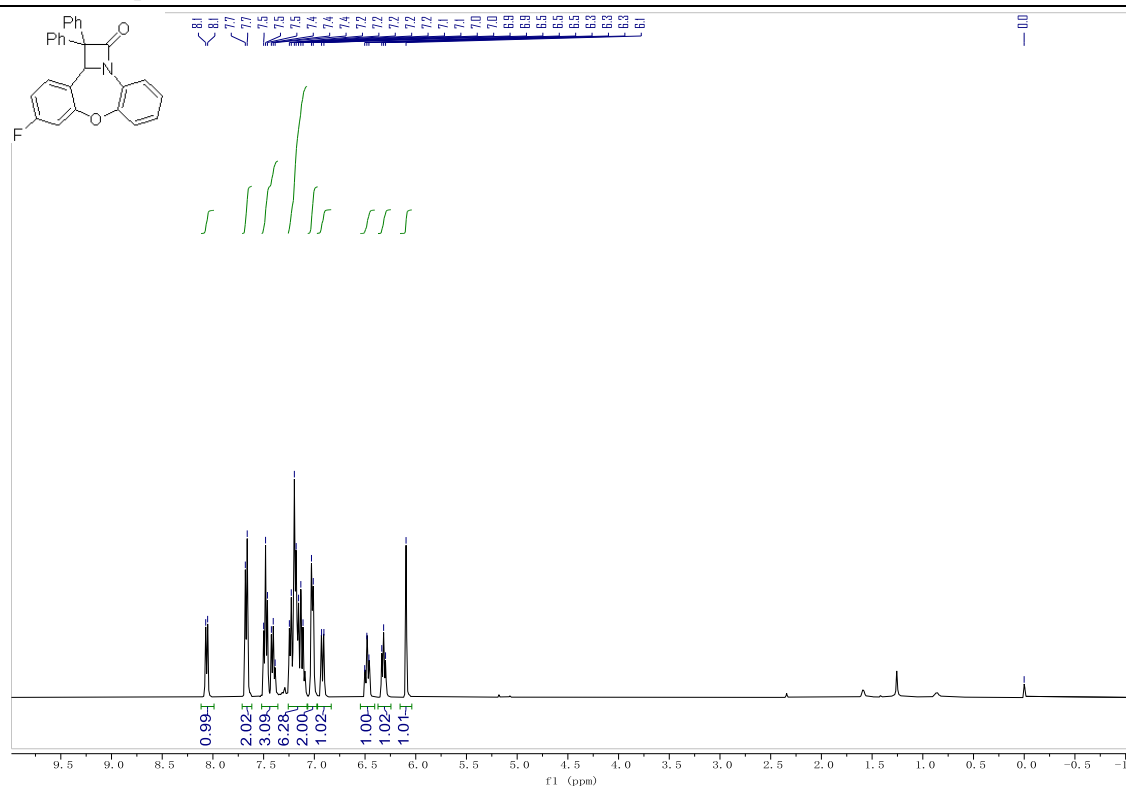

### <sup>13</sup>C NMR Spectrum of **3kq**

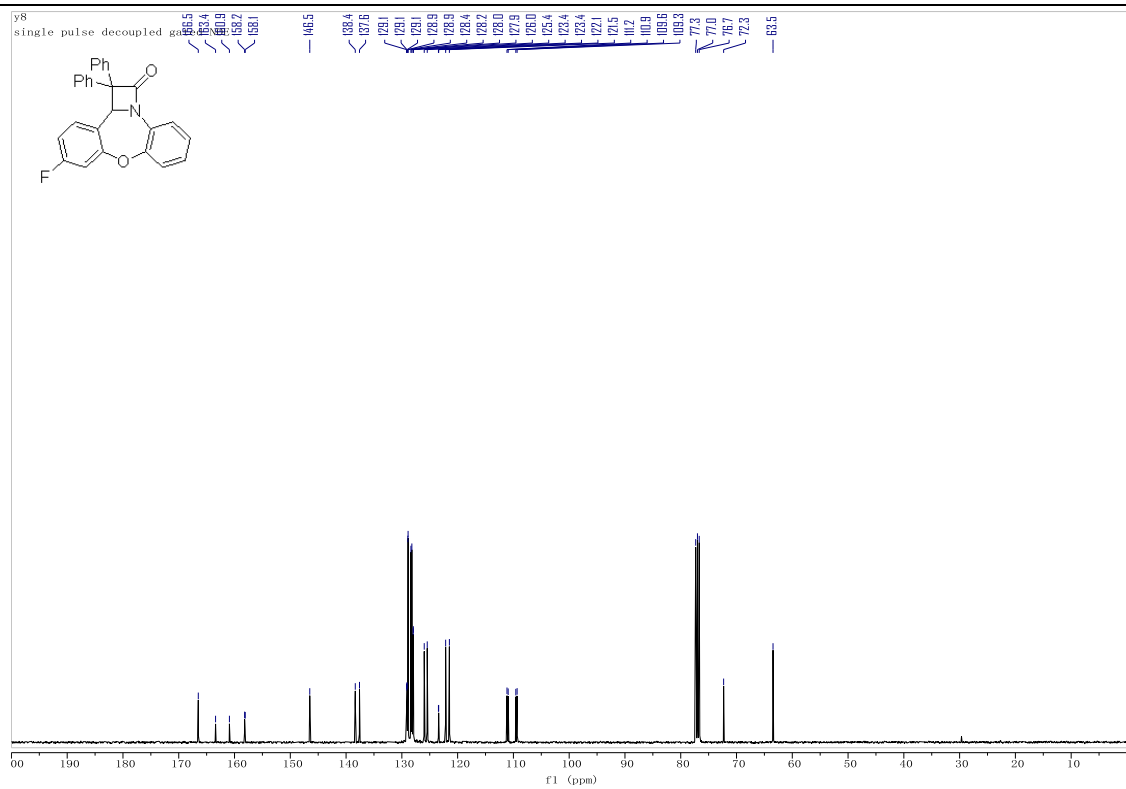



12062023-YCS7566, G. f1d

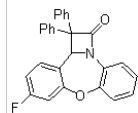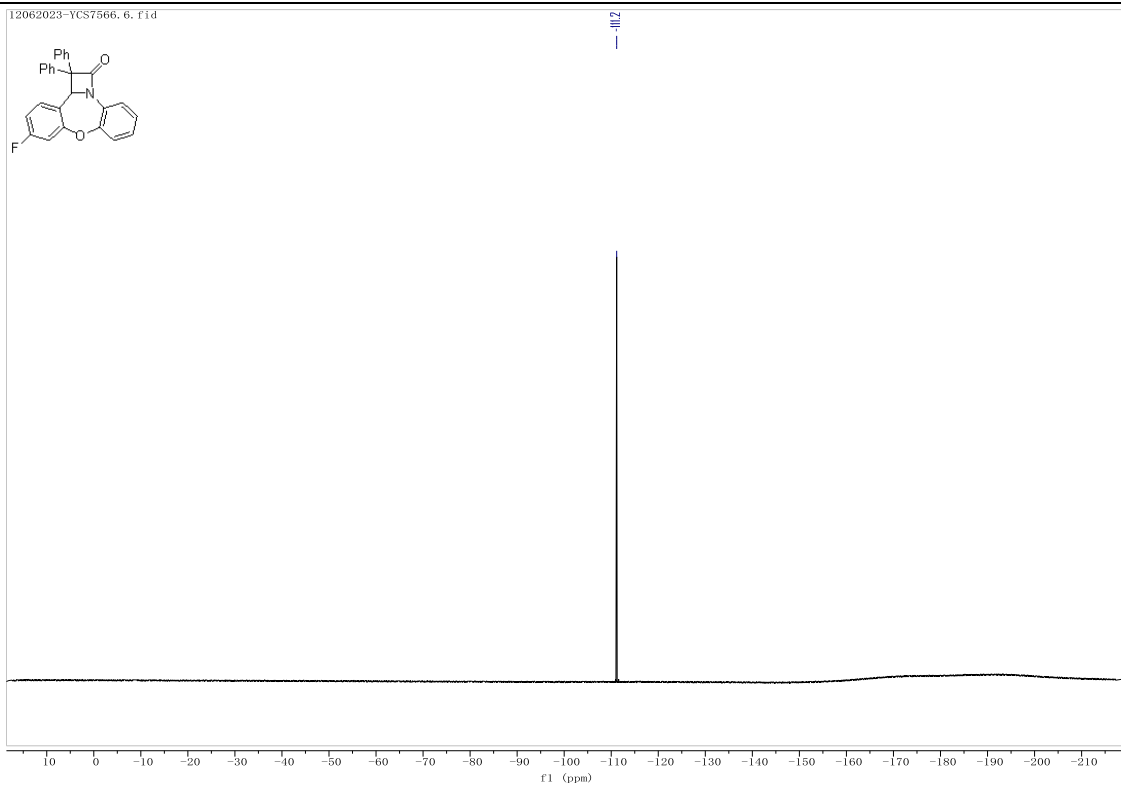

### <sup>1</sup>H NMR Spectrum of 3lq

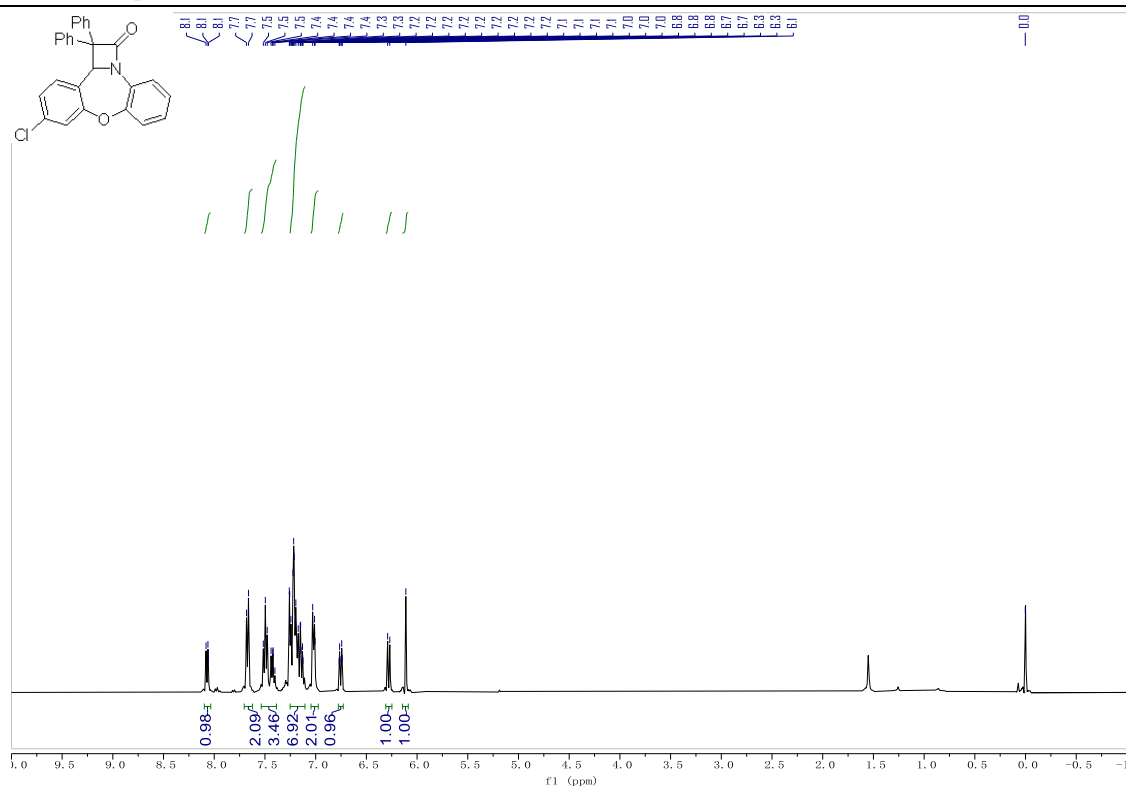

### <sup>13</sup>C NMR Spectrum of 3lq

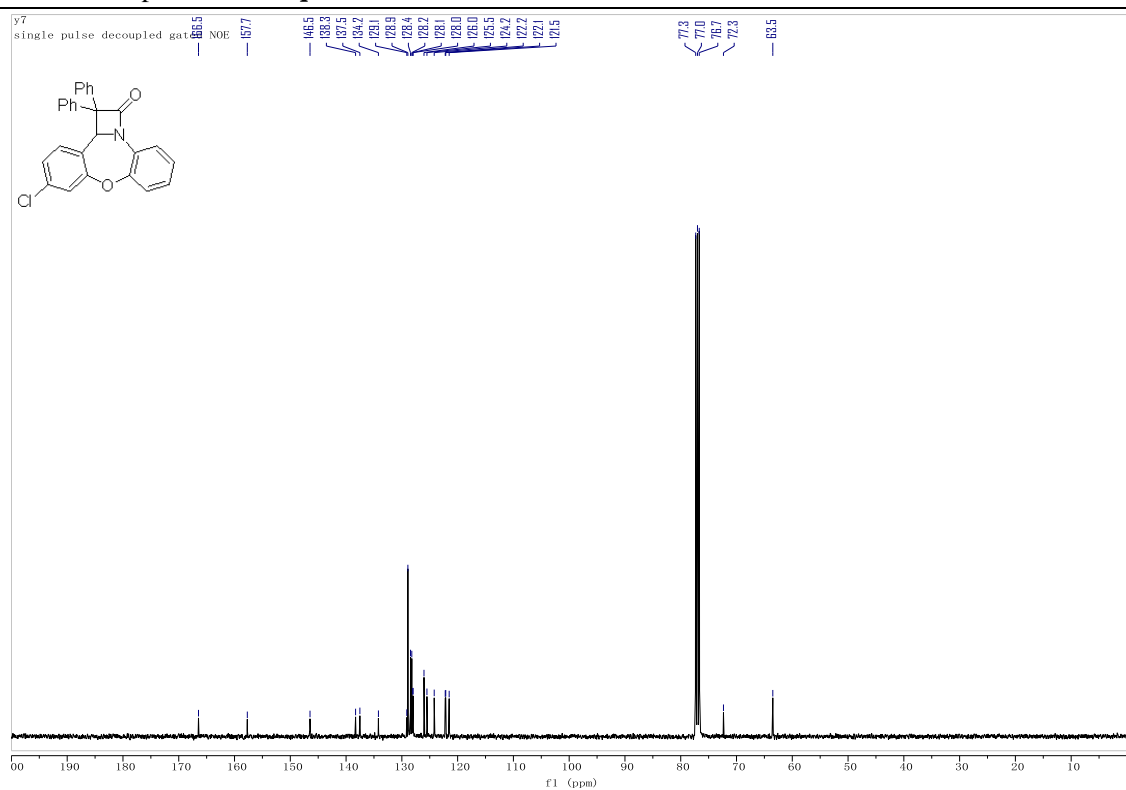

# <sup>1</sup>H NMR Spectrum of 3mq

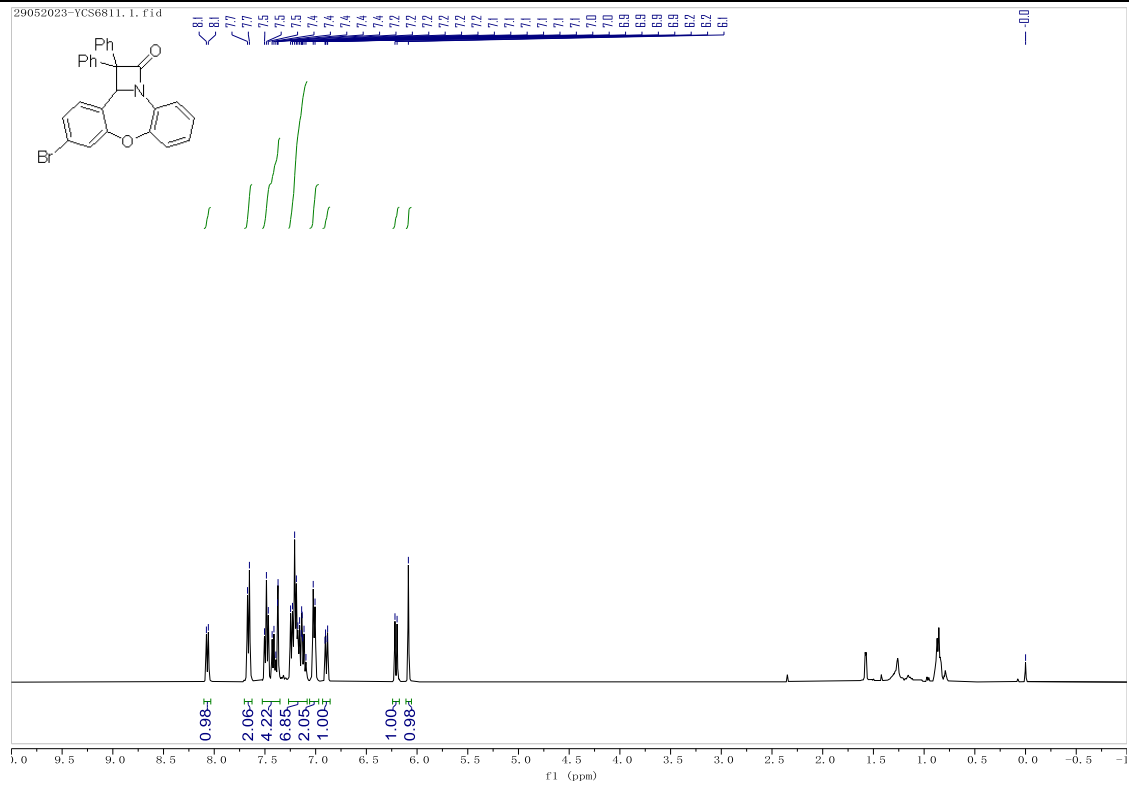

# <sup>13</sup>C NMR Spectrum of 3mq

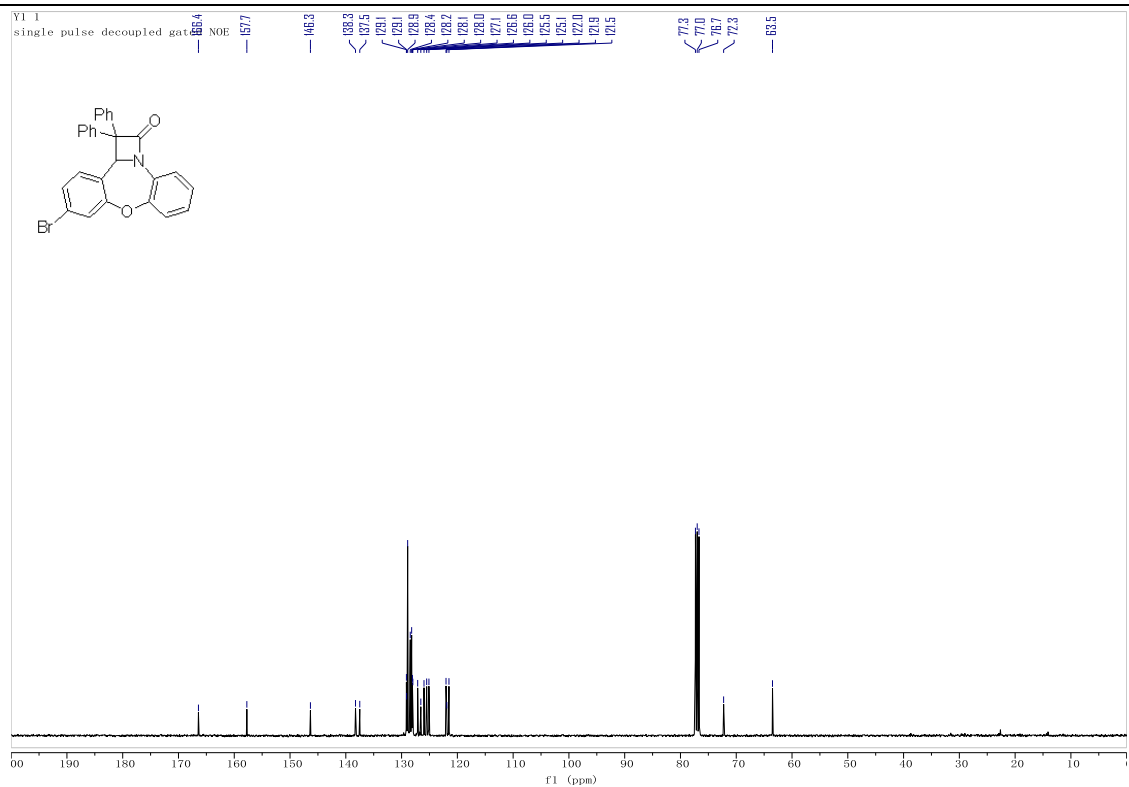





12062023-YCS7566\_3.f1d

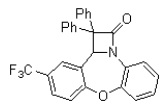

62.5

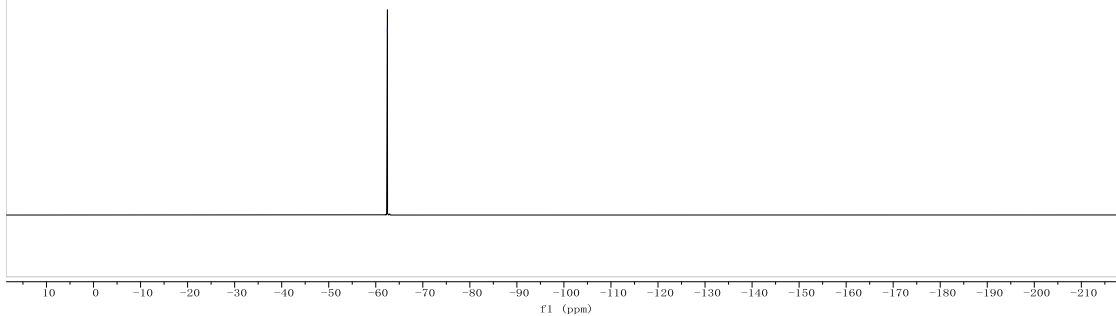

### <sup>1</sup>H NMR Spectrum of 3pq

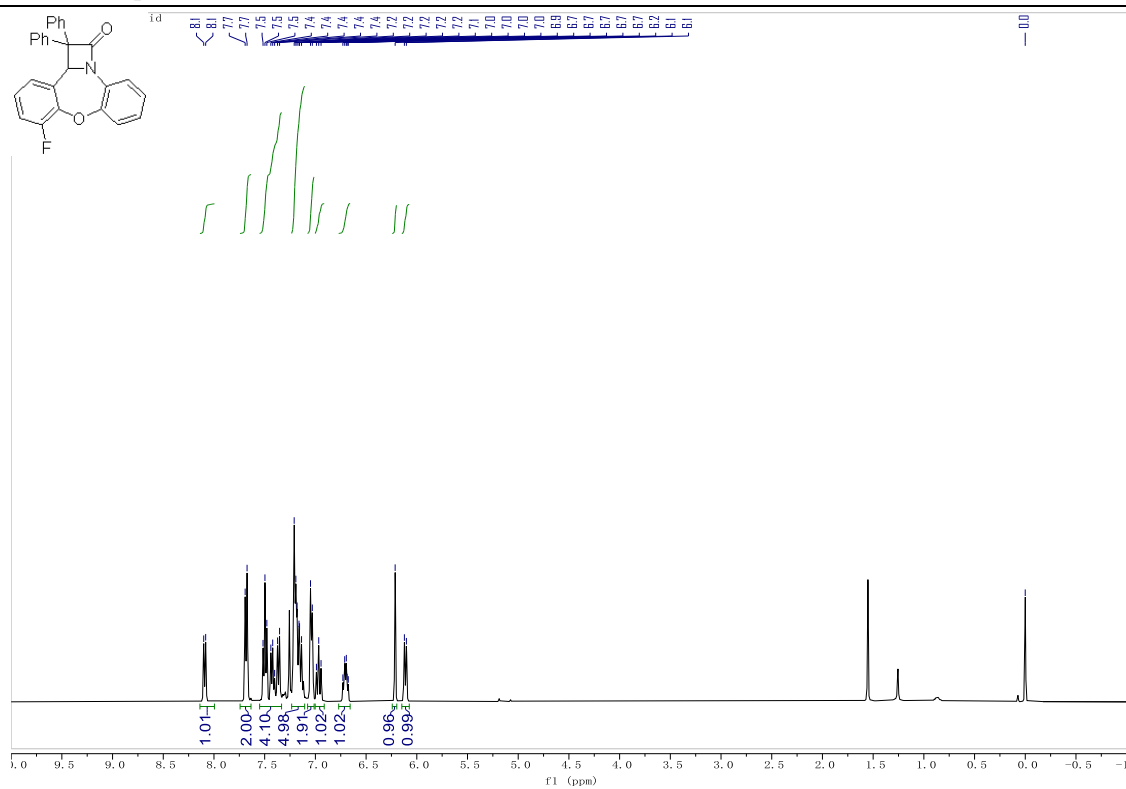

### <sup>13</sup>C NMR Spectrum of 3pq

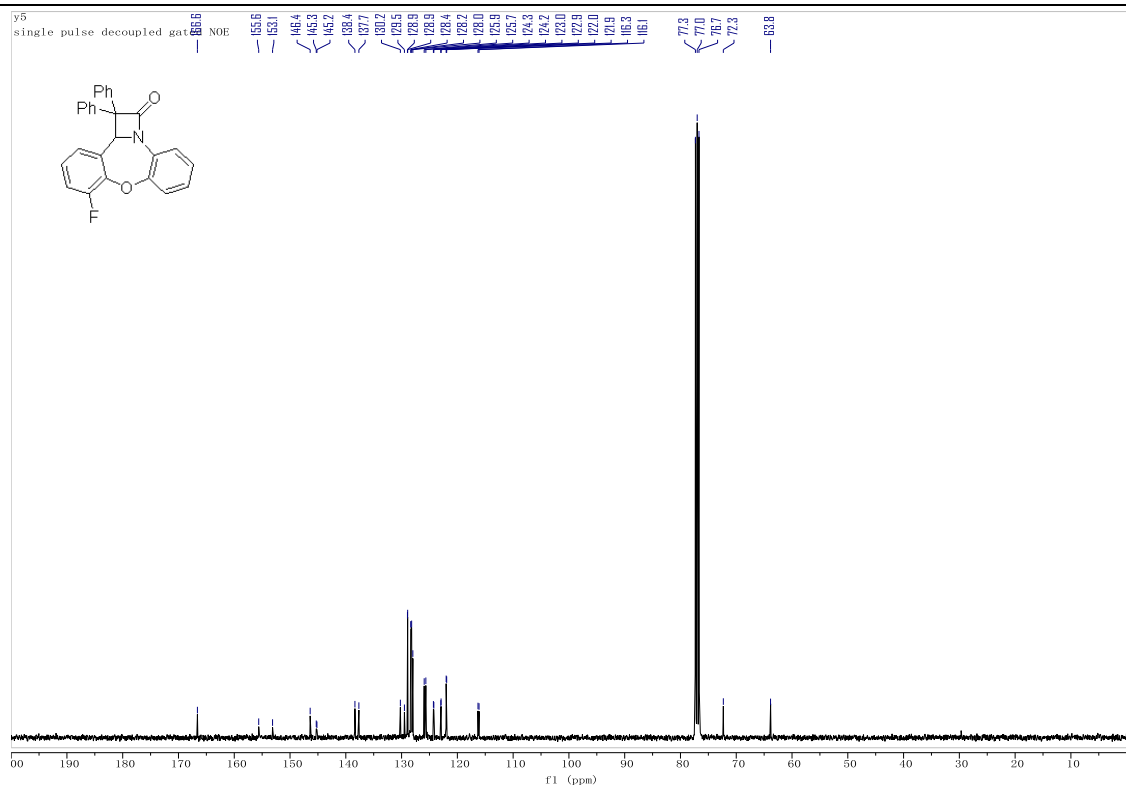

12062023-YCS7566. 7. f1d

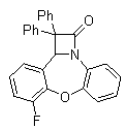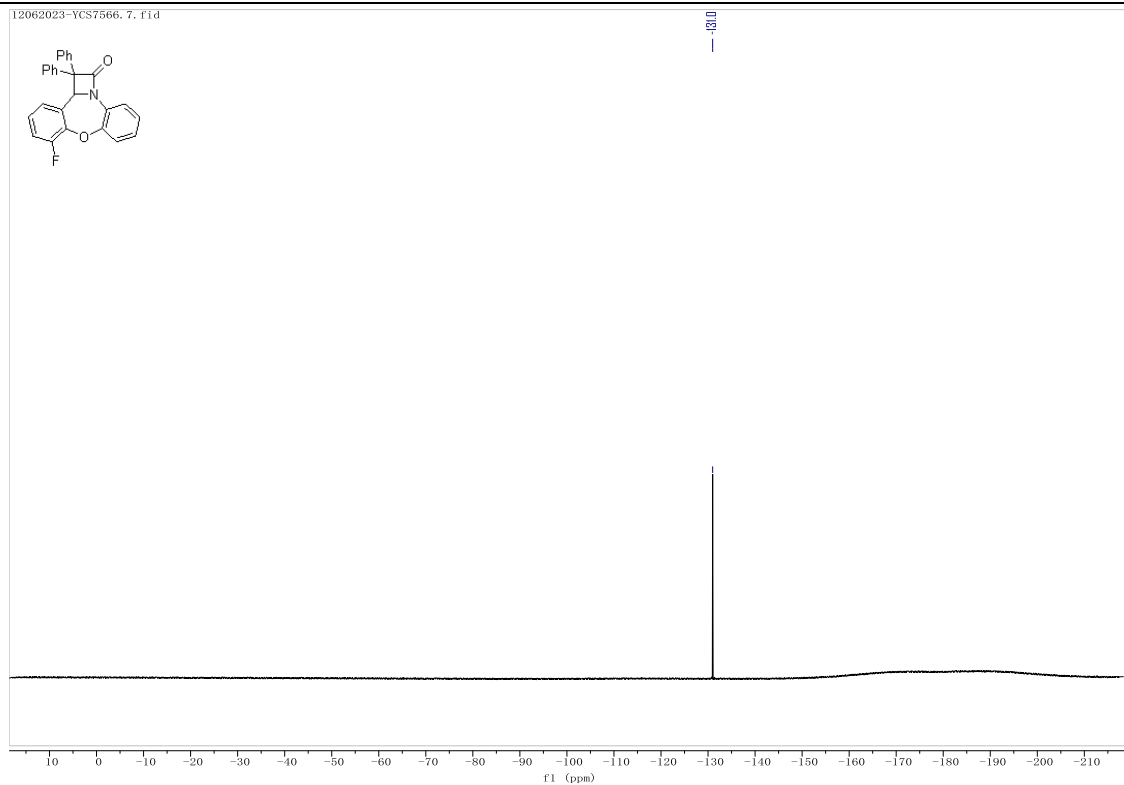



# <sup>1</sup>H NMR Spectrum of 3qq

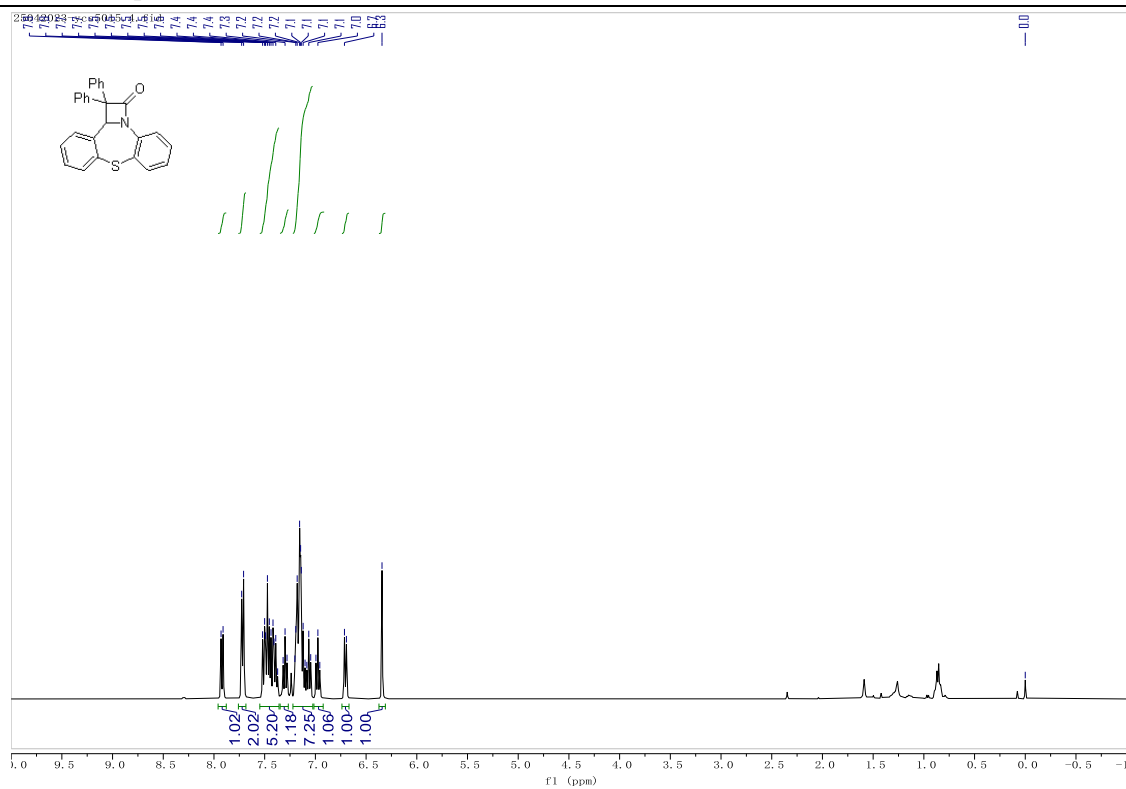

# <sup>13</sup>C NMR Spectrum of 3qq

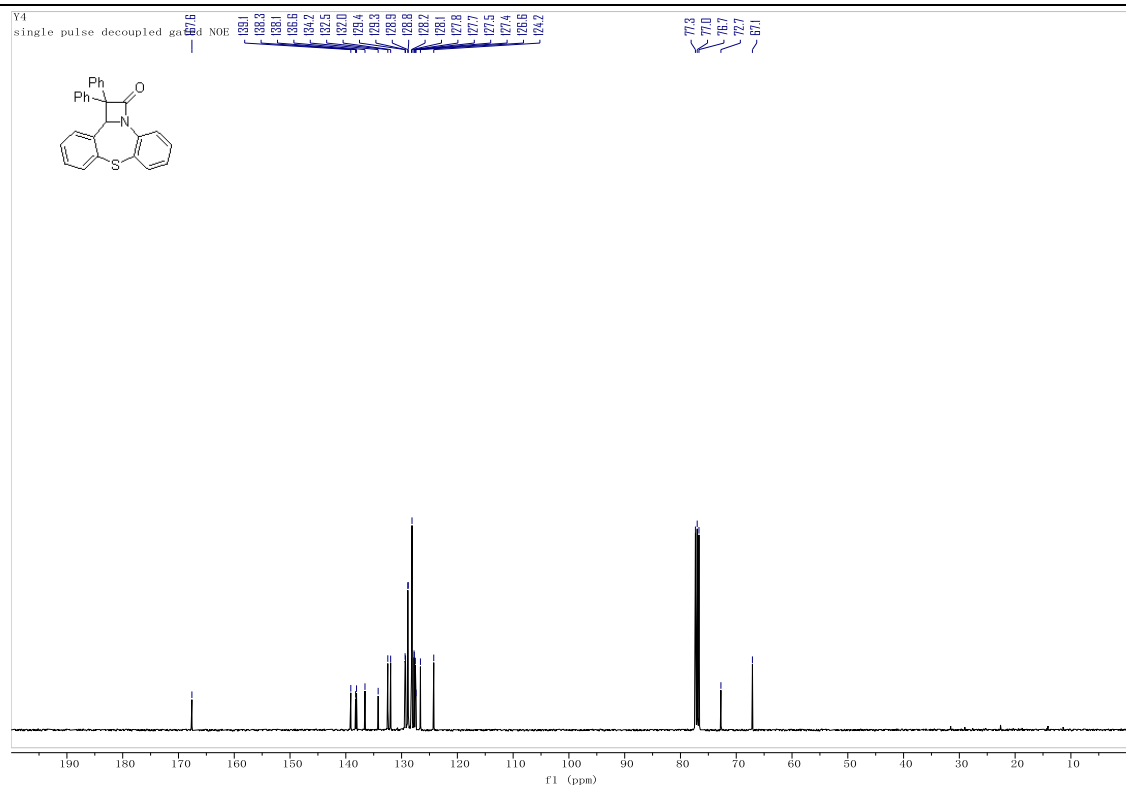

Supplement: d3ob01078c1.pdf [file d3ob01078c1.pdf]
